# Supplementary material for: Enforcement of developmental lineage specificity by transcription factor Oct1
Source: eLife. 2017 May 24;6:e20937. doi: 10.7554/eLife.20937 (PMC5466424; doi:10.7554/eLife.20937)
Supplement: Supplementary file 1. — DOI: http://dx.doi.org/10.7554/eLife.20937.031 [file elife-20937-supp1.xlsx]

## Sheet: day0_day14_comparison.xls
Shen et al Supplementary file 1-table 1: Normalized RNAseq gene expression changes
significantly changed (2.5 fold, P<0.05) genes in pluripotent and 14 day RA-differentiated parental and Oct1 defiicent cells are shown
Alt.Name	Gene.Name	day0.Log2Ratio	-log(10)day0.Adj.Pval	day14.Log2Ratio	-log(10)day14.Adj.Pval	d0_genes	d14_genes	both_genes
ENSMUSG00000001985	Grik3	1.37784	145.27	3.73435	814.626	TRUE	TRUE	TRUE
ENSMUSG00000009596	Taf7l	-1.51076	87.0348	1.41846	565.576	TRUE	TRUE	TRUE
ENSMUSG00000020467	Efemp1	1.42533	47.9025	-2.21028	1773.84	TRUE	TRUE	TRUE
ENSMUSG00000020788	Atp2a3	1.39096	97.855	1.51761	83.7246	TRUE	TRUE	TRUE
ENSMUSG00000021367	Edn1	1.61639	90.041	-1.32867	168.623	TRUE	TRUE	TRUE
ENSMUSG00000021508	Cxcl14	1.7927	113.665	2.32656	118.396	TRUE	TRUE	TRUE
ENSMUSG00000021803	Cdhr1	-1.36517	145.891	-2.0882	295.463	TRUE	TRUE	TRUE
ENSMUSG00000027188	Pamr1	1.67782	78.8382	1.35055	218.138	TRUE	TRUE	TRUE
ENSMUSG00000028341	Nr4a3	1.62249	76.1576	-1.83089	153.948	TRUE	TRUE	TRUE
ENSMUSG00000030218	Mgp	2.02211	92.184	1.40649	475.854	TRUE	TRUE	TRUE
ENSMUSG00000031375	Bgn	1.40234	45.8224	1.84614	1873.99	TRUE	TRUE	TRUE
ENSMUSG00000032015	Pou2f3	1.48692	50.3916	1.9273	177.181	TRUE	TRUE	TRUE
ENSMUSG00000032548	Slco2a1	1.70955	85.1243	1.36972	619.433	TRUE	TRUE	TRUE
ENSMUSG00000038963	Slco4a1	1.39364	100.458	2.27399	739.176	TRUE	TRUE	TRUE
ENSMUSG00000039349	C130074G19Rik	2.17294	564.92	1.3403	114.021	TRUE	TRUE	TRUE
ENSMUSG00000039376	Synpo2l	1.52285	56.8223	1.89792	164.766	TRUE	TRUE	TRUE
ENSMUSG00000041559	Fmod	1.83773	78.0456	2.74496	747.245	TRUE	TRUE	TRUE
ENSMUSG00000045330	4933402E13Rik	1.65781	97.6442	2.83626	1077.3	TRUE	TRUE	TRUE
ENSMUSG00000052353	Cemip	1.7321	77.179	-1.75157	691.797	TRUE	TRUE	TRUE
ENSMUSG00000055780	Usp26	-2.32557	830.756	-2.68938	404.64	TRUE	TRUE	TRUE
ENSMUSG00000062609	Kcnj15	1.3942	43.2806	1.81513	77.5749	TRUE	TRUE	TRUE
ENSMUSG00000075014	Gm10800	1.44599	45.8096	1.63694	48.1493	TRUE	TRUE	TRUE
ENSMUSG00000092035	Peg10	1.58309	151.503	1.46805	1427.62	TRUE	TRUE	TRUE
ENSMUSG00000000037	Scml2	-1.47396	96.5941	0.342366	7.37864	TRUE	FALSE	FALSE
ENSMUSG00000000184	Ccnd2	1.39225	74.3722	0.256317	41.2311	TRUE	FALSE	FALSE
ENSMUSG00000000305	Cdh4	1.75965	119.038	0	NA	TRUE	FALSE	FALSE
ENSMUSG00000000567	Sox9	1.35679	64.3846	-0.861936	122.312	TRUE	FALSE	FALSE
ENSMUSG00000001020	S100a4	1.50206	62.2578	0	NA	TRUE	FALSE	FALSE
ENSMUSG00000001025	S100a6	1.39551	139.232	0.0150559	0.594164	TRUE	FALSE	FALSE
ENSMUSG00000001661	Hoxc6	1.37841	46.1294	-0.667966	91.8033	TRUE	FALSE	FALSE
ENSMUSG00000002033	Cd3g	1.97775	166.139	0	NA	TRUE	FALSE	FALSE
ENSMUSG00000003410	Elavl3	-1.66878	128.387	0	NA	TRUE	FALSE	FALSE
ENSMUSG00000003545	Fosb	2.14536	409.481	-0.163678	2.85016	TRUE	FALSE	FALSE
ENSMUSG00000004044	Ptrf	1.36282	240.02	-0.789993	463.97	TRUE	FALSE	FALSE
ENSMUSG00000004631	Sgce	1.47621	65.9001	0.376474	86.5205	TRUE	FALSE	FALSE
ENSMUSG00000006205	Htra1	1.35916	122.14	-1.21051	936.507	TRUE	FALSE	FALSE
ENSMUSG00000006587	Snai3	1.63218	58.004	0	NA	TRUE	FALSE	FALSE
ENSMUSG00000008398	Elk3	1.65451	132.302	-0.442714	88.8365	TRUE	FALSE	FALSE
ENSMUSG00000008734	Gprc5b	1.56145	156.024	-0.7403	239.635	TRUE	FALSE	FALSE
ENSMUSG00000014599	Csf1	1.6002	76.5713	0.147911	11.7543	TRUE	FALSE	FALSE
ENSMUSG00000017009	Sdc4	1.38046	147.057	0.585703	99.5536	TRUE	FALSE	FALSE
ENSMUSG00000017417	Plxdc1	-1.46935	84.6733	0	NA	TRUE	FALSE	FALSE
ENSMUSG00000017466	Timp2	1.33264	45.3993	-0.072738	4.9072	TRUE	FALSE	FALSE
ENSMUSG00000019102	Aldh3a1	-1.42822	53.8366	0	NA	TRUE	FALSE	FALSE
ENSMUSG00000019235	Rps6kl1	-1.36174	81.0484	0	NA	TRUE	FALSE	FALSE
ENSMUSG00000019929	Dcn	1.35549	41.4022	-0.176359	3.8727	TRUE	FALSE	FALSE
ENSMUSG00000020053	Igf1	1.43555	45.1996	1.22967	362.729	TRUE	FALSE	FALSE
ENSMUSG00000020226	Slc5a4b	-1.56908	99.5472	0	NA	TRUE	FALSE	FALSE
ENSMUSG00000020299	4930524B15Rik	-1.5467	77.5564	0	NA	TRUE	FALSE	FALSE
ENSMUSG00000020387	Jade2	-1.64182	170.062	-0.802638	84.1335	TRUE	FALSE	FALSE
ENSMUSG00000020419	Hormad2	-1.44875	237.777	0	NA	TRUE	FALSE	FALSE
ENSMUSG00000020423	Btg2	1.37053	416.194	-0.0535419	3.06331	TRUE	FALSE	FALSE
ENSMUSG00000020437	Myo1g	-1.63129	83.3377	0	NA	TRUE	FALSE	FALSE
ENSMUSG00000020661	Dnmt3a	-1.5054	145.996	0.423662	86.3291	TRUE	FALSE	FALSE
ENSMUSG00000020846	Fam101b	1.74551	91.7159	0.541629	65.7589	TRUE	FALSE	FALSE
ENSMUSG00000021186	Fbln5	1.69578	85.2261	-0.171455	13.2654	TRUE	FALSE	FALSE
ENSMUSG00000021250	Fos	2.14324	118.751	0.964701	244.679	TRUE	FALSE	FALSE
ENSMUSG00000021253	Tgfb3	1.57729	69.8983	0.132321	11.1827	TRUE	FALSE	FALSE
ENSMUSG00000021365	Nedd9	1.63021	65.2142	-0.900994	293.447	TRUE	FALSE	FALSE
ENSMUSG00000021388	Aspn	1.39053	44.769	0	NA	TRUE	FALSE	FALSE
ENSMUSG00000021765	Fst	2.14917	376.23	1.079	222.491	TRUE	FALSE	FALSE
ENSMUSG00000021835	Bmp4	1.45796	49.4698	-0.173028	4.72753	TRUE	FALSE	FALSE
ENSMUSG00000021879	Dnah12	-1.51231	83.9353	0	NA	TRUE	FALSE	FALSE
ENSMUSG00000022150	Dab2	1.3232	91.8497	1.27258	986.396	TRUE	FALSE	FALSE
ENSMUSG00000022231	Sema5a	1.82064	239.855	-0.331736	33.7697	TRUE	FALSE	FALSE
ENSMUSG00000022240	Ctnnd2	1.53944	145.509	-1.24006	193.463	TRUE	FALSE	FALSE
ENSMUSG00000022432	Smc1b	-1.45288	86.0846	-1.17933	59.1625	TRUE	FALSE	FALSE
ENSMUSG00000022469	Rapgef3	1.63489	88.7535	0.435412	27.6303	TRUE	FALSE	FALSE
ENSMUSG00000022475	Hdac7	1.80428	247.585	-0.646001	139.4	TRUE	FALSE	FALSE
ENSMUSG00000022602	Arc	1.37968	41.8051	-0.83044	23.6511	TRUE	FALSE	FALSE
ENSMUSG00000022665	Ccdc80	1.33515	39.2642	0.745681	292.347	TRUE	FALSE	FALSE
ENSMUSG00000022687	Boc	1.70752	96.6228	-0.163841	13.4813	TRUE	FALSE	FALSE
ENSMUSG00000022816	Fstl1	1.60673	155.793	-0.803016	453.479	TRUE	FALSE	FALSE
ENSMUSG00000022912	Pros1	1.53228	447.368	0.354924	85.0994	TRUE	FALSE	FALSE
ENSMUSG00000022952	Runx1	1.33017	42.8957	-0.756739	102.804	TRUE	FALSE	FALSE
ENSMUSG00000023913	Pla2g7	1.45993	51.8954	0.462894	67.8749	TRUE	FALSE	FALSE
ENSMUSG00000023945	Slc5a7	1.41875	45.4616	0	NA	TRUE	FALSE	FALSE
ENSMUSG00000024063	Lbh	1.34506	47.3782	-0.11352	10.3835	TRUE	FALSE	FALSE
ENSMUSG00000024313	Mep1b	-1.44878	182.582	0	NA	TRUE	FALSE	FALSE
ENSMUSG00000024521	Pmaip1	1.44923	105.646	0.230755	17.2429	TRUE	FALSE	FALSE
ENSMUSG00000024526	Cidea	-1.46074	56.9675	0	NA	TRUE	FALSE	FALSE
ENSMUSG00000024837	Dmrt1	-1.34414	67.1494	0	NA	TRUE	FALSE	FALSE
ENSMUSG00000024940	Ltbp3	1.43195	59.565	-0.127877	9.97598	TRUE	FALSE	FALSE
ENSMUSG00000025085	Ablim1	1.43348	127.408	0.991612	358.048	TRUE	FALSE	FALSE
ENSMUSG00000025977	Boll	-1.47057	97.3544	0	NA	TRUE	FALSE	FALSE
ENSMUSG00000026335	Pam	1.413	100.94	-0.284427	33.6707	TRUE	FALSE	FALSE
ENSMUSG00000026365	Cfh	2.30003	226.942	-0.438886	59.9629	TRUE	FALSE	FALSE
ENSMUSG00000026479	Lamc2	1.43181	185.836	0.559329	64.3621	TRUE	FALSE	FALSE
ENSMUSG00000026586	Prrx1	1.38712	62.4467	-0.207992	11.1527	TRUE	FALSE	FALSE
ENSMUSG00000026672	Optn	1.3407	115.127	0.750414	114.49	TRUE	FALSE	FALSE
ENSMUSG00000026768	Itga8	1.73322	71.69	0.410093	11.1908	TRUE	FALSE	FALSE
ENSMUSG00000026826	Nr4a2	1.54515	94.2888	0	NA	TRUE	FALSE	FALSE
ENSMUSG00000026904	Slc4a10	-1.50934	116.139	0	NA	TRUE	FALSE	FALSE
ENSMUSG00000027208	Fgf7	2.11774	120.732	0	NA	TRUE	FALSE	FALSE
ENSMUSG00000027210	Meis2	1.39047	81.0252	-1.05173	497.344	TRUE	FALSE	FALSE
ENSMUSG00000027317	Ppp1r14d	2.42009	235.693	0	NA	TRUE	FALSE	FALSE
ENSMUSG00000027750	Postn	1.83568	183.48	0.889634	85.6753	TRUE	FALSE	FALSE
ENSMUSG00000027947	Il6ra	1.54925	73.2089	1.32055	205.323	TRUE	FALSE	FALSE
ENSMUSG00000027955	Fam198b	1.4826	114.776	-0.0395088	1.70163	TRUE	FALSE	FALSE
ENSMUSG00000028031	Dkk2	1.34062	40.9211	-0.625171	33.43	TRUE	FALSE	FALSE
ENSMUSG00000028195	Cyr61	1.49876	211.671	-0.276275	9.37993	TRUE	FALSE	FALSE
ENSMUSG00000028369	Svep1	1.38537	43.7384	0.428767	39.9923	TRUE	FALSE	FALSE
ENSMUSG00000028581	Laptm5	1.53179	301.338	0.283735	7.98918	TRUE	FALSE	FALSE
ENSMUSG00000028780	Sema3c	1.38193	57.1776	-1.203	598.827	TRUE	FALSE	FALSE
ENSMUSG00000028926	Cdk14	1.45923	59.4129	-0.101084	5.79446	TRUE	FALSE	FALSE
ENSMUSG00000029484	Anxa3	1.33404	63.5129	-0.411524	86.8475	TRUE	FALSE	FALSE
ENSMUSG00000029761	Cald1	1.41038	117.9	-1.28629	756.426	TRUE	FALSE	FALSE
ENSMUSG00000029810	Tmem176b	1.48281	56.6416	-0.245903	26.809	TRUE	FALSE	FALSE
ENSMUSG00000029838	Ptn	1.79036	79.0809	0.295908	7.99992	TRUE	FALSE	FALSE
ENSMUSG00000029848	Stra8	-2.03137	164.762	-0.0872119	1.14573	TRUE	FALSE	FALSE
ENSMUSG00000030087	Klf15	1.60069	87.35	0	NA	TRUE	FALSE	FALSE
ENSMUSG00000030208	Emp1	1.61375	143.909	0.0755275	4.33281	TRUE	FALSE	FALSE
ENSMUSG00000030222	Rerg	1.96812	125.201	0	NA	TRUE	FALSE	FALSE
ENSMUSG00000030409	Dmpk	1.39956	62.4467	-0.727695	127.642	TRUE	FALSE	FALSE
ENSMUSG00000030560	Ctsc	1.45149	333.962	0.176649	10.7504	TRUE	FALSE	FALSE
ENSMUSG00000030770	Parva	1.32193	77.2684	-0.373165	81.2387	TRUE	FALSE	FALSE
ENSMUSG00000031451	Gas6	1.56427	115.182	1.11014	693.195	TRUE	FALSE	FALSE
ENSMUSG00000031548	Sfrp1	1.32812	567.493	-0.728444	415.772	TRUE	FALSE	FALSE
ENSMUSG00000031662	Snx20	1.60002	76.4679	0	NA	TRUE	FALSE	FALSE
ENSMUSG00000031673	Cdh11	1.35109	52.994	0.291952	44.6459	TRUE	FALSE	FALSE
ENSMUSG00000031709	Tbc1d9	-1.70541	187.593	-0.651169	91.9022	TRUE	FALSE	FALSE
ENSMUSG00000031740	Mmp2	2.1731	435.1	-0.314463	65.117	TRUE	FALSE	FALSE
ENSMUSG00000031788	Kifc3	1.4585	142.981	1.27168	406.046	TRUE	FALSE	FALSE
ENSMUSG00000032060	Cryab	1.46234	81.7535	-0.487669	105.671	TRUE	FALSE	FALSE
ENSMUSG00000032092	Mpzl2	1.34185	133.036	0.430552	35.1251	TRUE	FALSE	FALSE
ENSMUSG00000032094	Cd3d	2.00042	150.16	0	NA	TRUE	FALSE	FALSE
ENSMUSG00000032204	Aqp9	1.61213	80.7578	0	NA	TRUE	FALSE	FALSE
ENSMUSG00000032470	Mras	1.50669	148.896	-0.629606	109.729	TRUE	FALSE	FALSE
ENSMUSG00000032591	Mst1	1.50991	77.8447	0	NA	TRUE	FALSE	FALSE
ENSMUSG00000032649	Colgalt2	1.79371	112.936	0	NA	TRUE	FALSE	FALSE
ENSMUSG00000032714	Syde1	1.46775	70.4258	-0.281997	29.1318	TRUE	FALSE	FALSE
ENSMUSG00000033149	Phldb2	1.39229	79.5052	-0.247138	46.0386	TRUE	FALSE	FALSE
ENSMUSG00000033191	Tie1	1.69152	79.7082	0	NA	TRUE	FALSE	FALSE
ENSMUSG00000033256	Shf	-1.47548	91.7655	0.312546	12.5603	TRUE	FALSE	FALSE
ENSMUSG00000033467	Crlf2	-2.16723	166.857	-0.96035	157.064	TRUE	FALSE	FALSE
ENSMUSG00000034324	Tmem132c	1.38279	73.0613	0.616786	21.1849	TRUE	FALSE	FALSE
ENSMUSG00000034336	Ina	-1.68533	219.927	0	NA	TRUE	FALSE	FALSE
ENSMUSG00000034690	Nlrp4c	-2.22842	231.28	0	NA	TRUE	FALSE	FALSE
ENSMUSG00000034739	Mfrp	1.56909	58.5625	0.65765	36.3023	TRUE	FALSE	FALSE
ENSMUSG00000035258	Abi3bp	1.76177	67.5021	0	NA	TRUE	FALSE	FALSE
ENSMUSG00000035299	Mid1	1.33837	211.999	0.497589	85.5716	TRUE	FALSE	FALSE
ENSMUSG00000035357	Pdzrn3	1.34417	48.8186	-1.09075	686.051	TRUE	FALSE	FALSE
ENSMUSG00000036098	Myrf	-1.45559	103.711	0.657128	130.977	TRUE	FALSE	FALSE
ENSMUSG00000036256	Igfbp7	1.48715	79.312	1.20451	587.586	TRUE	FALSE	FALSE
ENSMUSG00000037028	Gm12800	1.81211	90.1818	0	NA	TRUE	FALSE	FALSE
ENSMUSG00000037188	Grhl3	1.41081	243.04	0.792983	55.0554	TRUE	FALSE	FALSE
ENSMUSG00000037679	Inf2	1.34656	142.98	0.608921	129.992	TRUE	FALSE	FALSE
ENSMUSG00000037736	Limch1	1.54403	64.5428	-0.299699	18.4752	TRUE	FALSE	FALSE
ENSMUSG00000037852	Cpe	1.53788	108.217	-0.901257	360.122	TRUE	FALSE	FALSE
ENSMUSG00000037868	Egr2	2.62228	181.896	0	NA	TRUE	FALSE	FALSE
ENSMUSG00000038020	Rapgefl1	-1.329	61.2542	-0.451448	17.9912	TRUE	FALSE	FALSE
ENSMUSG00000038296	Galnt18	1.42414	44.5038	-0.754848	92.5035	TRUE	FALSE	FALSE
ENSMUSG00000038387	Rras	1.35502	352.628	0.0442856	1.98372	TRUE	FALSE	FALSE
ENSMUSG00000038418	Egr1	2.51303	137.569	-0.452436	70.705	TRUE	FALSE	FALSE
ENSMUSG00000038463	Olfml2b	1.3629	45.3972	0.028062	0.636924	TRUE	FALSE	FALSE
ENSMUSG00000038578	Susd1	1.5706	145.071	1.04842	131.218	TRUE	FALSE	FALSE
ENSMUSG00000038793	Lefty1	-2.02277	665.508	0.679427	17.677	TRUE	FALSE	FALSE
ENSMUSG00000039337	Tex19.2	-1.43407	97.1995	0	NA	TRUE	FALSE	FALSE
ENSMUSG00000039462	Col10a1	1.63537	59.0867	0	NA	TRUE	FALSE	FALSE
ENSMUSG00000039601	Rcan2	1.68649	68.0053	-0.596337	32.2269	TRUE	FALSE	FALSE
ENSMUSG00000040563	Lppr2	2.09952	204.739	0.540651	73.3635	TRUE	FALSE	FALSE
ENSMUSG00000041482	Piezo2	1.77428	76.8397	0.151107	17.6858	TRUE	FALSE	FALSE
ENSMUSG00000041782	Lad1	1.40252	47.5848	0.989653	153.123	TRUE	FALSE	FALSE
ENSMUSG00000042010	Acacb	1.55621	426.984	0.807805	35.1636	TRUE	FALSE	FALSE
ENSMUSG00000042417	Ccno	-1.69785	90.4941	0	NA	TRUE	FALSE	FALSE
ENSMUSG00000042622	Maff	1.63059	124.562	0.759206	88.1493	TRUE	FALSE	FALSE
ENSMUSG00000042834	Nrep	1.46214	99.9688	0.377077	67.405	TRUE	FALSE	FALSE
ENSMUSG00000043073	Usp17le	1.38523	52.0854	0	NA	TRUE	FALSE	FALSE
ENSMUSG00000044674	Fzd1	1.43211	79.4214	-0.227239	27.7532	TRUE	FALSE	FALSE
ENSMUSG00000045658	Pid1	1.33005	210.862	0.314618	26.3713	TRUE	FALSE	FALSE
ENSMUSG00000046323	Dppa3	-1.7602	240.519	0	NA	TRUE	FALSE	FALSE
ENSMUSG00000046435	Gm13078	1.60372	64.476	0	NA	TRUE	FALSE	FALSE
ENSMUSG00000047242	Taf9b	-1.32844	89.6343	0.353229	23.4839	TRUE	FALSE	FALSE
ENSMUSG00000047501	Cldn4	1.58531	430.624	0.0916901	1.86698	TRUE	FALSE	FALSE
ENSMUSG00000048332	Lhfp	1.42948	57.8546	-0.707262	206.168	TRUE	FALSE	FALSE
ENSMUSG00000048458	Fam212b	1.68098	78.3315	-1.07046	246.507	TRUE	FALSE	FALSE
ENSMUSG00000049001	Ndnf	1.73424	66.2712	-0.366829	9.17654	TRUE	FALSE	FALSE
ENSMUSG00000050069	Grem2	1.94755	112.77	-0.768219	57.3662	TRUE	FALSE	FALSE
ENSMUSG00000050737	Ptges	2.49899	230.447	-0.904248	218.272	TRUE	FALSE	FALSE
ENSMUSG00000051048	P4ha3	1.46697	48.6019	-1.06689	213.797	TRUE	FALSE	FALSE
ENSMUSG00000051457	Spn	-1.40862	55.4965	0.728155	48.41	TRUE	FALSE	FALSE
ENSMUSG00000052684	Jun	1.70744	209.025	-0.826241	427.346	TRUE	FALSE	FALSE
ENSMUSG00000054272	Zscan4c	1.53912	80.9488	0	NA	TRUE	FALSE	FALSE
ENSMUSG00000054675	Tmem119	1.32567	38.7009	0.193435	11.6437	TRUE	FALSE	FALSE
ENSMUSG00000055403	4933427D06Rik	-1.40652	52.8028	0	NA	TRUE	FALSE	FALSE
ENSMUSG00000055675	Kbtbd11	1.63909	140.83	0	NA	TRUE	FALSE	FALSE
ENSMUSG00000055945	Prr18	1.47974	50.5093	0	NA	TRUE	FALSE	FALSE
ENSMUSG00000057098	Ebf1	1.51219	134.505	0	NA	TRUE	FALSE	FALSE
ENSMUSG00000057321	Usp17ld	1.41299	50.2738	0	NA	TRUE	FALSE	FALSE
ENSMUSG00000058571	Gpc6	1.47364	56.6172	-0.854317	267.384	TRUE	FALSE	FALSE
ENSMUSG00000058914	C1qtnf3	1.81707	83.6284	-0.894126	27.8273	TRUE	FALSE	FALSE
ENSMUSG00000058976	Usp17lc	1.76333	80.3083	0	NA	TRUE	FALSE	FALSE
ENSMUSG00000060512	0610040J01Rik	1.74856	68.4115	0.313887	6.22752	TRUE	FALSE	FALSE
ENSMUSG00000062007	Hsh2d	-1.49725	58.0284	0	NA	TRUE	FALSE	FALSE
ENSMUSG00000062184	Hs6st2	1.43723	55.8176	-1.1602	483.845	TRUE	FALSE	FALSE
ENSMUSG00000062380	Tubb3	-1.55719	107.752	-0.153203	5.7795	TRUE	FALSE	FALSE
ENSMUSG00000063011	Msln	1.54591	104.219	0.594144	116.607	TRUE	FALSE	FALSE
ENSMUSG00000063296	Tmem117	1.34904	49.676	0	NA	TRUE	FALSE	FALSE
ENSMUSG00000063727	Tnfrsf11b	1.44894	71.9521	-0.857481	53.5071	TRUE	FALSE	FALSE
ENSMUSG00000064215	Ifi27	1.33879	48.2639	-0.327635	52.6561	TRUE	FALSE	FALSE
ENSMUSG00000066129	Kndc1	1.32833	44.2203	0	NA	TRUE	FALSE	FALSE
ENSMUSG00000067399	Trim43c	-2.04771	133.42	0	NA	TRUE	FALSE	FALSE
ENSMUSG00000070034	Sp110	1.99528	140.652	-0.658456	38.5901	TRUE	FALSE	FALSE
ENSMUSG00000070327	Rnf213	-1.39713	51.559	-0.692286	167.218	TRUE	FALSE	FALSE
ENSMUSG00000070407	Hs3st3b1	1.67885	114.47	0.929866	59.8186	TRUE	FALSE	FALSE
ENSMUSG00000070424	Art5	1.41464	59.4129	0	NA	TRUE	FALSE	FALSE
ENSMUSG00000070495	Ctcfl	-1.77647	79.2892	0	NA	TRUE	FALSE	FALSE
ENSMUSG00000070616	Gm13040	2.1814	145.945	0	NA	TRUE	FALSE	FALSE
ENSMUSG00000070618	BC080695	2.16495	173.864	0	NA	TRUE	FALSE	FALSE
ENSMUSG00000070619	Gm13119	1.63467	73.2927	0	NA	TRUE	FALSE	FALSE
ENSMUSG00000070803	Cited4	2.29657	213.758	0	NA	TRUE	FALSE	FALSE
ENSMUSG00000070826	#N/A	1.6554	92.9189	0	NA	TRUE	FALSE	FALSE
ENSMUSG00000070828	Zscan4f	1.57208	92.3501	0	NA	TRUE	FALSE	FALSE
ENSMUSG00000070890	Gm12794	1.81979	90.9217	0	NA	TRUE	FALSE	FALSE
ENSMUSG00000070902	Zfp352	2.01387	95.7058	0	NA	TRUE	FALSE	FALSE
ENSMUSG00000072109	A530040E14Rik	1.39166	46.404	0	NA	TRUE	FALSE	FALSE
ENSMUSG00000072566	#N/A	1.3581	97.2603	-0.701386	75.0055	TRUE	FALSE	FALSE
ENSMUSG00000072817	#N/A	1.40056	50.0866	0	NA	TRUE	FALSE	FALSE
ENSMUSG00000072823	#N/A	1.33068	43.9839	0	NA	TRUE	FALSE	FALSE
ENSMUSG00000073497	AA792892	1.96494	95.8357	0	NA	TRUE	FALSE	FALSE
ENSMUSG00000073499	#N/A	1.60394	65.1659	0	NA	TRUE	FALSE	FALSE
ENSMUSG00000073726	#N/A	1.92669	101.485	0	NA	TRUE	FALSE	FALSE
ENSMUSG00000074009	#N/A	1.53025	55.5424	0	NA	TRUE	FALSE	FALSE
ENSMUSG00000074743	Thbd	1.73636	104.006	-0.867876	279.99	TRUE	FALSE	FALSE
ENSMUSG00000075394	Hoxc4	1.37313	51.5299	-0.104957	4.51702	TRUE	FALSE	FALSE
ENSMUSG00000076749	Tcrg-C1	-2.13267	179.693	0	NA	TRUE	FALSE	FALSE
ENSMUSG00000078190	Dnm3os	1.41994	45.5882	0.583263	63.5971	TRUE	FALSE	FALSE
ENSMUSG00000078234	Klhdc7a	2.58643	254.826	-0.403304	14.9593	TRUE	FALSE	FALSE
ENSMUSG00000078302	Foxd1	2.13312	165.113	0	NA	TRUE	FALSE	FALSE
ENSMUSG00000078510	Gm13101	1.60847	59.8618	0	NA	TRUE	FALSE	FALSE
ENSMUSG00000078511	Pramef25	2.23026	164.696	0	NA	TRUE	FALSE	FALSE
ENSMUSG00000078514	#N/A	2.16913	135.352	0	NA	TRUE	FALSE	FALSE
ENSMUSG00000078537	B020031M17Rik	1.7391	78.3982	0	NA	TRUE	FALSE	FALSE
ENSMUSG00000079037	Prnp	1.40745	67.7068	-0.253589	36.8494	TRUE	FALSE	FALSE
ENSMUSG00000079162	Trim43b	-1.51761	61.3635	0	NA	TRUE	FALSE	FALSE
ENSMUSG00000079422	#N/A	1.44046	48.8019	0	NA	TRUE	FALSE	FALSE
ENSMUSG00000079455	Gm16026	1.78736	86.9656	0	NA	TRUE	FALSE	FALSE
ENSMUSG00000079592	C1qtnf5	1.57687	59.0986	0.660308	36.1328	TRUE	FALSE	FALSE
ENSMUSG00000079672	#N/A	1.48968	56.4848	0	NA	TRUE	FALSE	FALSE
ENSMUSG00000079674	#N/A	1.45561	52.3195	0	NA	TRUE	FALSE	FALSE
ENSMUSG00000080241	Dppa3-ps	-1.71124	166.857	0	NA	TRUE	FALSE	FALSE
ENSMUSG00000084919	Ptprtos	-1.41616	75.3737	0	NA	TRUE	FALSE	FALSE
ENSMUSG00000087366	Junos	1.3829	52.8899	-0.796961	93.5906	TRUE	FALSE	FALSE
ENSMUSG00000087400	Gm15270	1.32443	158.616	-0.234025	4.47798	TRUE	FALSE	FALSE
ENSMUSG00000090714	Zscan4d	1.61699	84.627	0	NA	TRUE	FALSE	FALSE
ENSMUSG00000090854	Gm4340	2.01456	104.605	0	NA	TRUE	FALSE	FALSE
ENSMUSG00000091335	#N/A	1.76191	91.3963	0	NA	TRUE	FALSE	FALSE
ENSMUSG00000091643	#N/A	1.7975	108.616	0	NA	TRUE	FALSE	FALSE
ENSMUSG00000091647	#N/A	1.32797	40.8767	0	NA	TRUE	FALSE	FALSE
ENSMUSG00000091779	Gm21293	1.94848	115.97	0	NA	TRUE	FALSE	FALSE
ENSMUSG00000091880	#N/A	1.7065	101.734	0	NA	TRUE	FALSE	FALSE
ENSMUSG00000092130	D030025P21Rik	1.35767	41.9902	0.404438	16.4252	TRUE	FALSE	FALSE
ENSMUSG00000092258	Gm20444	1.35509	41.1098	0.618015	22.0126	TRUE	FALSE	FALSE
ENSMUSG00000000126	Wnt9a	0.698347	12.9206	-1.56194	698.684	FALSE	TRUE	FALSE
ENSMUSG00000000402	Egfl6	0.808743	56.8443	-2.59691	413.242	FALSE	TRUE	FALSE
ENSMUSG00000000530	Acvrl1	1.0283	24.6971	1.54023	315.163	FALSE	TRUE	FALSE
ENSMUSG00000000594	Gm2a	-0.430726	36.2607	1.54843	1104.18	FALSE	TRUE	FALSE
ENSMUSG00000000730	Dnmt3l	0.394824	12.2615	2.92706	297.415	FALSE	TRUE	FALSE
ENSMUSG00000000732	Icosl	0.532957	16.2497	2.15295	318.166	FALSE	TRUE	FALSE
ENSMUSG00000001131	Timp1	0.601449	58.7675	-1.76457	874.712	FALSE	TRUE	FALSE
ENSMUSG00000001281	Itgb7	-0.578052	25.2399	-1.68421	71.2713	FALSE	TRUE	FALSE
ENSMUSG00000001300	Efnb2	0.113398	1.80684	-1.41791	781.156	FALSE	TRUE	FALSE
ENSMUSG00000001348	Acp5	-0.341757	6.72614	1.513	361.29	FALSE	TRUE	FALSE
ENSMUSG00000001349	Cnn1	0.665341	14.6905	-2.46316	427.954	FALSE	TRUE	FALSE
ENSMUSG00000001604	Tcea3	-0.109959	3.18962	2.7273	554.81	FALSE	TRUE	FALSE
ENSMUSG00000001763	Tspan33	-0.0798812	0.777354	1.32273	114.179	FALSE	TRUE	FALSE
ENSMUSG00000001930	Vwf	1.17476	42.8525	1.5054	71.3015	FALSE	TRUE	FALSE
ENSMUSG00000002190	Clgn	-0.784352	43.1583	2.19341	85.4104	FALSE	TRUE	FALSE
ENSMUSG00000002688	Prkd1	0.172544	2.45407	-1.39683	346.215	FALSE	TRUE	FALSE
ENSMUSG00000002985	Apoe	0.0557084	2.14403	1.51485	1010.07	FALSE	TRUE	FALSE
ENSMUSG00000003153	Slc2a3	0.201006	9.37942	2.63847	416.656	FALSE	TRUE	FALSE
ENSMUSG00000003452	Bicd1	-0.781301	39.2338	-1.85069	815.555	FALSE	TRUE	FALSE
ENSMUSG00000003526	Prodh	-0.297792	6.14434	1.53854	80.1957	FALSE	TRUE	FALSE
ENSMUSG00000003948	Mmd	0.194417	3.59453	-1.36743	850.353	FALSE	TRUE	FALSE
ENSMUSG00000004661	Arid3b	-0.586399	70.39	2.07525	674.1	FALSE	TRUE	FALSE
ENSMUSG00000004864	Mapk13	0.457706	9.75905	1.35022	203.623	FALSE	TRUE	FALSE
ENSMUSG00000004885	Crabp2	-1.2574	68.9947	-2.25787	466.498	FALSE	TRUE	FALSE
ENSMUSG00000004891	Nes	-0.561642	64.855	-1.35264	713.29	FALSE	TRUE	FALSE
ENSMUSG00000005125	Ndrg1	0.154757	1.30108	1.40535	824.342	FALSE	TRUE	FALSE
ENSMUSG00000005251	Ripk4	0.588659	27.1587	1.60357	438.372	FALSE	TRUE	FALSE
ENSMUSG00000005672	Kit	0.182208	3.42545	1.80192	648.018	FALSE	TRUE	FALSE
ENSMUSG00000005681	Apoa2	-0.104789	1.46603	2.19491	120.914	FALSE	TRUE	FALSE
ENSMUSG00000006313	Upk1a	-0.203052	3.33706	-1.48871	229.62	FALSE	TRUE	FALSE
ENSMUSG00000006342	Susd2	0.782874	43.9839	1.68879	451.318	FALSE	TRUE	FALSE
ENSMUSG00000006567	Atp7b	0.344518	3.92069	2.81469	318.687	FALSE	TRUE	FALSE
ENSMUSG00000006641	Slc5a6	-0.000499421	0.00988621	1.44932	429.188	FALSE	TRUE	FALSE
ENSMUSG00000007034	Slc44a4	0.660954	29.2275	1.397	207.013	FALSE	TRUE	FALSE
ENSMUSG00000007097	Atp1a2	0.160127	1.41499	1.54099	294.911	FALSE	TRUE	FALSE
ENSMUSG00000007655	Cav1	1.08647	35.3106	-1.59173	781.502	FALSE	TRUE	FALSE
ENSMUSG00000009075	Cabp7	-0.101574	1.67163	-1.55402	338.167	FALSE	TRUE	FALSE
ENSMUSG00000009248	Ascl2	0.151401	1.54379	2.55088	113.152	FALSE	TRUE	FALSE
ENSMUSG00000009670	Tex11	-0.761759	23.463	-1.38074	276.766	FALSE	TRUE	FALSE
ENSMUSG00000010064	Slc38a3	0.387014	4.53558	1.74084	122.008	FALSE	TRUE	FALSE
ENSMUSG00000010592	Dazl	-0.200606	1.9729	-3.56798	993.169	FALSE	TRUE	FALSE
ENSMUSG00000013418	B4galnt2	-0.222848	2.24606	2.16859	430.388	FALSE	TRUE	FALSE
ENSMUSG00000013833	Med16	-0.0674155	1.4776	-1.35223	401.576	FALSE	TRUE	FALSE
ENSMUSG00000014361	Mertk	0.458352	7.03438	2.03833	676.88	FALSE	TRUE	FALSE
ENSMUSG00000015027	Galns	0.115981	1.27055	1.34789	431.863	FALSE	TRUE	FALSE
ENSMUSG00000015134	Aldh1a3	0.919215	24.4952	2.19082	569.144	FALSE	TRUE	FALSE
ENSMUSG00000015709	Arnt2	0.37392	5.91277	-1.77671	700.428	FALSE	TRUE	FALSE
ENSMUSG00000016239	Lonrf3	-0.231504	3.33643	1.99206	253.261	FALSE	TRUE	FALSE
ENSMUSG00000017639	Rab11fip4	-0.559133	25.5399	2.26083	587.831	FALSE	TRUE	FALSE
ENSMUSG00000017697	Ada	0.499332	23.4742	2.9655	1907.86	FALSE	TRUE	FALSE
ENSMUSG00000017817	Jph2	0.905037	18.9228	-2.08596	1447.27	FALSE	TRUE	FALSE
ENSMUSG00000017861	Mybl2	0.25471	8.7948	2.23769	851.008	FALSE	TRUE	FALSE
ENSMUSG00000018569	Cldn7	-0.133608	1.27678	1.48705	139.697	FALSE	TRUE	FALSE
ENSMUSG00000018830	Myh11	0.643901	13.8658	-1.72932	325.792	FALSE	TRUE	FALSE
ENSMUSG00000018986	Slfn3	-0.987332	55.9752	-1.50609	109.078	FALSE	TRUE	FALSE
ENSMUSG00000019564	Arid3a	-0.0631941	1.04129	1.34903	763.743	FALSE	TRUE	FALSE
ENSMUSG00000019767	Ccdc170	-0.100695	0.786093	2.41217	166.5	FALSE	TRUE	FALSE
ENSMUSG00000019817	Plagl1	0.576761	168.006	1.57412	1040.6	FALSE	TRUE	FALSE
ENSMUSG00000019846	Lama4	1.00547	26.3004	1.44728	517.481	FALSE	TRUE	FALSE
ENSMUSG00000019891	Dcbld1	0.514875	19.6687	1.92817	676.563	FALSE	TRUE	FALSE
ENSMUSG00000019894	Slc6a15	-0.618145	20.1018	1.33508	73.3787	FALSE	TRUE	FALSE
ENSMUSG00000020122	Egfr	1.05459	48.7316	-1.80479	1714.76	FALSE	TRUE	FALSE
ENSMUSG00000020331	Hcn2	0.242521	6.06522	1.5926	217.634	FALSE	TRUE	FALSE
ENSMUSG00000020363	Gfpt2	-0.349729	16.866	-1.34411	427.887	FALSE	TRUE	FALSE
ENSMUSG00000020407	Upp1	-0.547787	26.0721	2.30849	493.854	FALSE	TRUE	FALSE
ENSMUSG00000020427	Igfbp3	0.71393	30.5557	-1.6739	897.453	FALSE	TRUE	FALSE
ENSMUSG00000020589	Fam49a	0.040007	0.345097	-1.55364	727.358	FALSE	TRUE	FALSE
ENSMUSG00000020681	Ace	0.276111	3.59372	1.48721	53.8475	FALSE	TRUE	FALSE
ENSMUSG00000020709	Adap2	-0.282659	6.55807	2.07074	138.425	FALSE	TRUE	FALSE
ENSMUSG00000020774	Aspa	0.775397	19.1758	1.85937	160.276	FALSE	TRUE	FALSE
ENSMUSG00000020836	Coro6	0.0497279	0.347867	-1.40033	267.721	FALSE	TRUE	FALSE
ENSMUSG00000020844	Nxn	-0.437663	30.6233	-1.85848	2158.7	FALSE	TRUE	FALSE
ENSMUSG00000020875	Hoxb9	0.397292	8.60843	-1.3356	294.571	FALSE	TRUE	FALSE
ENSMUSG00000020950	Foxg1	0.659806	14.6494	-2.48058	220.099	FALSE	TRUE	FALSE
ENSMUSG00000021047	Nova1	0.075624	0.859142	-1.99758	151.59	FALSE	TRUE	FALSE
ENSMUSG00000021069	Pygl	0.226386	2.12883	2.12734	798.997	FALSE	TRUE	FALSE
ENSMUSG00000021255	Esrrb	0.110223	4.2317	1.3835	70.4976	FALSE	TRUE	FALSE
ENSMUSG00000021294	Kif26a	0.556116	8.02321	2.90264	673.895	FALSE	TRUE	FALSE
ENSMUSG00000021360	Gcnt2	0.449722	20.5484	1.37752	409.633	FALSE	TRUE	FALSE
ENSMUSG00000021364	Elovl2	-0.0549962	0.552137	1.82643	89.2082	FALSE	TRUE	FALSE
ENSMUSG00000021451	Sema4d	-0.41437	29.1449	1.51458	257.641	FALSE	TRUE	FALSE
ENSMUSG00000021591	Glrx	0.403504	7.43418	1.94277	496.219	FALSE	TRUE	FALSE
ENSMUSG00000021594	Srd5a1	-0.152044	2.16583	1.88477	570.881	FALSE	TRUE	FALSE
ENSMUSG00000021638	Ocln	0.439712	17.6964	1.7463	409.633	FALSE	TRUE	FALSE
ENSMUSG00000021676	Iqgap2	0.155756	4.39857	2.29228	1040.3	FALSE	TRUE	FALSE
ENSMUSG00000021678	F2rl1	0.466855	10.6596	2.44338	807.692	FALSE	TRUE	FALSE
ENSMUSG00000021725	Parp8	0.613786	10.2606	-1.53382	575.201	FALSE	TRUE	FALSE
ENSMUSG00000021822	Plau	0.642031	10.3916	-1.56171	490.189	FALSE	TRUE	FALSE
ENSMUSG00000021831	Ero1l	-0.0854954	1.23665	1.41873	792.118	FALSE	TRUE	FALSE
ENSMUSG00000021895	Arhgef3	-0.316695	13.5329	2.12828	1138.34	FALSE	TRUE	FALSE
ENSMUSG00000021944	Gata4	0.289414	3.28496	1.72639	713.657	FALSE	TRUE	FALSE
ENSMUSG00000021998	Lcp1	0.91252	31.6066	1.71516	1154.92	FALSE	TRUE	FALSE
ENSMUSG00000022018	Rgcc	-0.197983	2.19953	2.21919	239.411	FALSE	TRUE	FALSE
ENSMUSG00000022034	Esco2	-0.395717	20.8215	1.57902	291.836	FALSE	TRUE	FALSE
ENSMUSG00000022037	Clu	0.272438	5.38152	1.43509	1044.48	FALSE	TRUE	FALSE
ENSMUSG00000022055	Nefl	0.230637	4.93239	-1.36634	93.1522	FALSE	TRUE	FALSE
ENSMUSG00000022096	Hr	-0.00355914	0.0339156	1.53855	133.403	FALSE	TRUE	FALSE
ENSMUSG00000022102	Dok2	-0.221291	4.36595	1.47578	170.175	FALSE	TRUE	FALSE
ENSMUSG00000022206	Npr3	0.897758	48.1661	-1.56858	544.15	FALSE	TRUE	FALSE
ENSMUSG00000022218	Tgm1	0.462679	13.6758	1.58378	430.377	FALSE	TRUE	FALSE
ENSMUSG00000022332	Khdrbs3	-0.0064809	0.0917058	-1.79037	815.006	FALSE	TRUE	FALSE
ENSMUSG00000022415	Syngr1	-0.105737	3.64759	1.53399	597.974	FALSE	TRUE	FALSE
ENSMUSG00000022438	Parvb	1.03399	108.223	1.64607	603.221	FALSE	TRUE	FALSE
ENSMUSG00000022505	Emp2	1.20462	65.2396	1.35648	393.89	FALSE	TRUE	FALSE
ENSMUSG00000022871	Fetub	0.315773	5.01026	2.14736	181.428	FALSE	TRUE	FALSE
ENSMUSG00000022885	St6gal1	-0.0251921	0.208476	-1.4358	900.048	FALSE	TRUE	FALSE
ENSMUSG00000023043	Krt18	0.685824	27.4198	1.43388	1287.68	FALSE	TRUE	FALSE
ENSMUSG00000023243	Kcnk5	-0.474378	44.8415	2.59238	1203.9	FALSE	TRUE	FALSE
ENSMUSG00000023484	Prph	-0.802564	17.1813	1.8462	117.592	FALSE	TRUE	FALSE
ENSMUSG00000023572	Ccndbp1	-0.195967	7.124	-1.40061	571.558	FALSE	TRUE	FALSE
ENSMUSG00000023886	Smoc2	1.29934	37.1426	-2.09863	1569.47	FALSE	TRUE	FALSE
ENSMUSG00000023906	Cldn6	-0.140488	1.65465	1.59256	517.675	FALSE	TRUE	FALSE
ENSMUSG00000023942	Slc29a1	0.349614	12.5798	2.09173	1407.27	FALSE	TRUE	FALSE
ENSMUSG00000023990	Tfeb	0.243297	8.65669	1.49058	270.828	FALSE	TRUE	FALSE
ENSMUSG00000024014	Pim1	0.20829	7.49921	-1.39799	984.73	FALSE	TRUE	FALSE
ENSMUSG00000024030	Abcg1	-0.191932	2.09763	1.3717	229.894	FALSE	TRUE	FALSE
ENSMUSG00000024036	Slc37a1	-0.547641	20.1026	1.59532	334.72	FALSE	TRUE	FALSE
ENSMUSG00000024140	Epas1	0.534962	14.5778	2.03915	1091.47	FALSE	TRUE	FALSE
ENSMUSG00000024206	Rfx2	-0.29913	11.5827	1.53438	120.398	FALSE	TRUE	FALSE
ENSMUSG00000024391	Apom	0.578393	12.1657	2.86527	130.104	FALSE	TRUE	FALSE
ENSMUSG00000024617	Camk2a	1.31164	58.9029	1.44938	63.3026	FALSE	TRUE	FALSE
ENSMUSG00000024621	Csf1r	0.102719	2.09824	2.18436	2139.55	FALSE	TRUE	FALSE
ENSMUSG00000024738	Pga5	-0.814076	16.6773	2.82871	1485.18	FALSE	TRUE	FALSE
ENSMUSG00000024778	Fas	0.90272	18.8926	-1.65646	510.185	FALSE	TRUE	FALSE
ENSMUSG00000024805	Pcgf5	0.246681	5.84407	1.58412	629.66	FALSE	TRUE	FALSE
ENSMUSG00000024910	Ctsw	-0.446933	8.63894	1.52276	121.756	FALSE	TRUE	FALSE
ENSMUSG00000024935	Slc1a1	0.626958	44.1308	2.12385	168.028	FALSE	TRUE	FALSE
ENSMUSG00000025277	Abhd6	0.213939	5.51898	1.52994	681.76	FALSE	TRUE	FALSE
ENSMUSG00000025478	Dpysl4	-0.0473254	0.351234	1.47929	90.8778	FALSE	TRUE	FALSE
ENSMUSG00000025504	Eps8l2	-0.00664293	0.0885557	1.63192	1415.49	FALSE	TRUE	FALSE
ENSMUSG00000025586	Cpeb1	-0.230835	4.05188	-1.56482	205.46	FALSE	TRUE	FALSE
ENSMUSG00000025608	Podxl	0.586582	25.025	1.45924	1095.59	FALSE	TRUE	FALSE
ENSMUSG00000025810	Nrp1	1.19182	47.5704	-1.42559	640.651	FALSE	TRUE	FALSE
ENSMUSG00000025813	Homer2	0.412663	14.8167	1.6297	453.286	FALSE	TRUE	FALSE
ENSMUSG00000025885	Myo5b	-0.0840723	0.79598	1.84453	601.919	FALSE	TRUE	FALSE
ENSMUSG00000026110	Mgat4a	-0.242273	5.39026	1.32561	461.668	FALSE	TRUE	FALSE
ENSMUSG00000026208	Des	0.480969	25.8346	-2.1734	275.784	FALSE	TRUE	FALSE
ENSMUSG00000026235	Epha4	0.255747	14.4854	1.55573	427.186	FALSE	TRUE	FALSE
ENSMUSG00000026255	Efhd1	0.113609	1.25664	1.43326	46.1636	FALSE	TRUE	FALSE
ENSMUSG00000026389	Steap3	-0.0438835	0.519561	1.58482	234.406	FALSE	TRUE	FALSE
ENSMUSG00000026418	Tnni1	0.900939	21.741	1.71411	157.269	FALSE	TRUE	FALSE
ENSMUSG00000026435	Slc45a3	0.0604083	0.746489	1.36685	136.275	FALSE	TRUE	FALSE
ENSMUSG00000026483	Fam129a	0.840217	105.458	1.45041	477.342	FALSE	TRUE	FALSE
ENSMUSG00000026564	Dusp27	-0.668154	36.9948	-1.75193	70.5579	FALSE	TRUE	FALSE
ENSMUSG00000026576	Atp1b1	0.169355	11.2178	1.59891	761.369	FALSE	TRUE	FALSE
ENSMUSG00000026628	Atf3	1.24871	74.587	1.39888	434.226	FALSE	TRUE	FALSE
ENSMUSG00000026640	Plxna2	-0.328391	7.10108	-2.04093	1290.38	FALSE	TRUE	FALSE
ENSMUSG00000026688	Mgst3	0.584026	16.4394	1.86364	380.886	FALSE	TRUE	FALSE
ENSMUSG00000026821	Ralgds	0.104289	1.67599	1.44709	1019.93	FALSE	TRUE	FALSE
ENSMUSG00000026873	Phf19	-0.736607	16.4263	1.97706	188.839	FALSE	TRUE	FALSE
ENSMUSG00000026979	Psd4	-0.319669	5.57998	2.49058	1268.77	FALSE	TRUE	FALSE
ENSMUSG00000027082	Tfpi	0.821991	54.6234	1.3633	1257.67	FALSE	TRUE	FALSE
ENSMUSG00000027111	Itga6	0.229699	6.22472	1.35821	598.175	FALSE	TRUE	FALSE
ENSMUSG00000027296	Itpka	-0.357581	13.2802	2.11382	110.161	FALSE	TRUE	FALSE
ENSMUSG00000027297	Ltk	0.223257	2.46971	2.15258	155.428	FALSE	TRUE	FALSE
ENSMUSG00000027463	Slc52a3	0.604957	13.8751	1.75454	232.03	FALSE	TRUE	FALSE
ENSMUSG00000027478	Dnmt3b	-0.154587	3.08513	1.92225	390.308	FALSE	TRUE	FALSE
ENSMUSG00000027495	Fam210b	0.227816	4.70573	1.61353	542.881	FALSE	TRUE	FALSE
ENSMUSG00000027500	Stmn2	0.0906157	2.79126	-1.34186	323.595	FALSE	TRUE	FALSE
ENSMUSG00000027508	Pag1	0.765447	17.5243	1.47395	325.38	FALSE	TRUE	FALSE
ENSMUSG00000027562	Car2	-0.0633914	0.638668	3.04255	2299.55	FALSE	TRUE	FALSE
ENSMUSG00000027597	Ahcy	-0.392471	63.1103	-2.3277	1483.93	FALSE	TRUE	FALSE
ENSMUSG00000027611	Procr	0.752676	14.7508	1.59497	557.86	FALSE	TRUE	FALSE
ENSMUSG00000027654	Fam83d	0.226304	11.6444	1.45326	334.2	FALSE	TRUE	FALSE
ENSMUSG00000027669	Gnb4	-0.0843304	0.903989	1.48426	574.984	FALSE	TRUE	FALSE
ENSMUSG00000027794	Sohlh2	-0.46539	18.3446	-1.33496	681.5	FALSE	TRUE	FALSE
ENSMUSG00000027996	Sfrp2	-1.0586	28.089	2.64428	358.395	FALSE	TRUE	FALSE
ENSMUSG00000028019	Pdgfc	0.695242	73.3182	-1.51044	949.22	FALSE	TRUE	FALSE
ENSMUSG00000028035	Dnajb4	0.633448	11.3802	-1.52937	1182.12	FALSE	TRUE	FALSE
ENSMUSG00000028064	Sema4a	-0.0623586	0.625865	2.11233	116.388	FALSE	TRUE	FALSE
ENSMUSG00000028078	Dclk2	-0.0343532	0.723629	-2.1497	582.375	FALSE	TRUE	FALSE
ENSMUSG00000028108	Ecm1	0.647701	21.0167	-1.34292	653.186	FALSE	TRUE	FALSE
ENSMUSG00000028158	Mttp	-0.396696	7.77833	2.51037	1204.31	FALSE	TRUE	FALSE
ENSMUSG00000028179	Cth	1.06682	112.403	-1.40344	89.2198	FALSE	TRUE	FALSE
ENSMUSG00000028354	Fmn2	0.328957	11.8633	-1.57818	102.567	FALSE	TRUE	FALSE
ENSMUSG00000028370	Pappa	0.896407	22.7862	-2.48601	159.879	FALSE	TRUE	FALSE
ENSMUSG00000028435	Aqp3	0.19047	3.99006	1.88128	299.546	FALSE	TRUE	FALSE
ENSMUSG00000028439	Fam219a	0.843766	25.0288	1.34401	437.93	FALSE	TRUE	FALSE
ENSMUSG00000028464	Tpm2	0.928011	31.7202	-1.33015	682.436	FALSE	TRUE	FALSE
ENSMUSG00000028587	Orc1	-0.167767	12.0686	1.33595	142.372	FALSE	TRUE	FALSE
ENSMUSG00000028591	Pramef12	-0.154305	3.3151	1.66548	1016.68	FALSE	TRUE	FALSE
ENSMUSG00000028626	Col9a2	-0.861537	31.9461	1.91718	255.526	FALSE	TRUE	FALSE
ENSMUSG00000028640	Tfap2c	-0.763581	14.6744	2.24438	1340.61	FALSE	TRUE	FALSE
ENSMUSG00000028645	Slc2a1	0.488143	105.453	1.3742	1029.76	FALSE	TRUE	FALSE
ENSMUSG00000028671	Gale	0.203678	5.48128	1.52883	434.647	FALSE	TRUE	FALSE
ENSMUSG00000028680	Plk3	0.281739	5.25258	1.39403	471.226	FALSE	TRUE	FALSE
ENSMUSG00000028766	Alpl	0.0563395	1.45286	2.14047	1983.22	FALSE	TRUE	FALSE
ENSMUSG00000028795	Ccdc28b	0.199063	2.09485	-1.39322	159.188	FALSE	TRUE	FALSE
ENSMUSG00000028836	Slc30a2	0.7322	23.3165	1.78619	286.581	FALSE	TRUE	FALSE
ENSMUSG00000028838	Extl1	0.840732	19.6494	2.28833	443.912	FALSE	TRUE	FALSE
ENSMUSG00000028909	Ptpru	-0.095549	0.835259	1.57683	132.288	FALSE	TRUE	FALSE
ENSMUSG00000028933	Xrcc2	-0.192989	4.90279	1.33359	202.702	FALSE	TRUE	FALSE
ENSMUSG00000028977	Casz1	0.556634	19.3939	1.45722	169.732	FALSE	TRUE	FALSE
ENSMUSG00000028995	Fam126a	0.180111	3.87736	-1.45337	1068.38	FALSE	TRUE	FALSE
ENSMUSG00000029032	Arhgef16	0.207925	2.89306	1.72316	732.692	FALSE	TRUE	FALSE
ENSMUSG00000029056	Pank4	-0.767326	58.9638	-1.76915	504.346	FALSE	TRUE	FALSE
ENSMUSG00000029082	Bst1	0.310317	5.76907	3.38808	412.727	FALSE	TRUE	FALSE
ENSMUSG00000029103	Lrpap1	0.322058	38.1757	1.81412	1324.48	FALSE	TRUE	FALSE
ENSMUSG00000029108	Pcdh7	0.906636	19.6985	-1.70744	940.613	FALSE	TRUE	FALSE
ENSMUSG00000029120	Ppp2r2c	0.676614	63.5321	1.35817	315.59	FALSE	TRUE	FALSE
ENSMUSG00000029201	Ugdh	-0.0200475	0.304182	1.42679	928.795	FALSE	TRUE	FALSE
ENSMUSG00000029223	Uchl1	-1.10751	322.905	-1.74683	562.979	FALSE	TRUE	FALSE
ENSMUSG00000029322	Plac8	0.00760494	0.0580494	1.55584	915.46	FALSE	TRUE	FALSE
ENSMUSG00000029330	Cds1	-0.777112	25.8666	1.65266	307.753	FALSE	TRUE	FALSE
ENSMUSG00000029359	Tesc	-0.113229	1.76368	-2.20819	174.751	FALSE	TRUE	FALSE
ENSMUSG00000029413	Naaa	-0.457073	10.4667	1.46648	265.023	FALSE	TRUE	FALSE
ENSMUSG00000029436	Mmp17	1.10891	114.592	-2.10635	1047.14	FALSE	TRUE	FALSE
ENSMUSG00000029602	Rasal1	-0.271186	5.35896	1.90281	223.609	FALSE	TRUE	FALSE
ENSMUSG00000029603	Dtx1	-0.0566622	0.577334	2.66064	683.846	FALSE	TRUE	FALSE
ENSMUSG00000029648	Flt1	1.28215	45.4598	2.27388	1511.06	FALSE	TRUE	FALSE
ENSMUSG00000029659	Medag	0.980247	22.8471	-1.89135	777.021	FALSE	TRUE	FALSE
ENSMUSG00000029994	Anxa4	0.888759	58.4368	1.37963	842.11	FALSE	TRUE	FALSE
ENSMUSG00000030067	Foxp1	0.0753126	0.919128	-1.35201	805.637	FALSE	TRUE	FALSE
ENSMUSG00000030256	Bhlhe41	0.635026	10.0626	1.78408	450.988	FALSE	TRUE	FALSE
ENSMUSG00000030342	Cd9	0.492811	49.4698	1.74764	1627.1	FALSE	TRUE	FALSE
ENSMUSG00000030353	Tead4	0.804304	44.3063	1.49977	318.586	FALSE	TRUE	FALSE
ENSMUSG00000030428	Ttyh1	-0.44981	13.179	1.74969	95.6947	FALSE	TRUE	FALSE
ENSMUSG00000030494	Rhpn2	-1.17781	372.191	1.45628	395.143	FALSE	TRUE	FALSE
ENSMUSG00000030559	Rab38	0.703997	21.4608	-1.44895	99.7078	FALSE	TRUE	FALSE
ENSMUSG00000030638	Sh3gl3	0.217392	4.82641	-1.52446	193.115	FALSE	TRUE	FALSE
ENSMUSG00000030669	Calca	-0.392697	4.69731	-2.78729	116.574	FALSE	TRUE	FALSE
ENSMUSG00000030769	Slc5a11	0.266759	4.3242	2.66949	119.692	FALSE	TRUE	FALSE
ENSMUSG00000030792	Dkkl1	-0.172277	1.74155	2.81061	738.986	FALSE	TRUE	FALSE
ENSMUSG00000030800	Prss8	0.185585	2.03191	2.21602	1327.63	FALSE	TRUE	FALSE
ENSMUSG00000031165	Was	0.185962	3.78303	2.69653	133.683	FALSE	TRUE	FALSE
ENSMUSG00000031207	Msn	0.581444	74.973	-1.50242	228.928	FALSE	TRUE	FALSE
ENSMUSG00000031216	Stard8	0.655361	16.2981	2.41547	887.277	FALSE	TRUE	FALSE
ENSMUSG00000031245	Hmgn5	-0.407926	16.9199	1.62533	138.359	FALSE	TRUE	FALSE
ENSMUSG00000031373	Car5b	0.444911	7.27264	1.45625	109.969	FALSE	TRUE	FALSE
ENSMUSG00000031383	Dusp9	-0.325593	14.7733	1.90371	2002.18	FALSE	TRUE	FALSE
ENSMUSG00000031651	Triml1	0.606219	56.498	1.85094	165.746	FALSE	TRUE	FALSE
ENSMUSG00000031665	Sall1	-0.315775	28.5691	1.66306	454.848	FALSE	TRUE	FALSE
ENSMUSG00000031681	Smad1	0.12597	2.56395	-1.63854	1030.22	FALSE	TRUE	FALSE
ENSMUSG00000031749	St3gal2	-0.0993989	1.88076	-1.37059	884.795	FALSE	TRUE	FALSE
ENSMUSG00000031785	Adgrg1	-0.0396372	0.303427	2.06448	1014.44	FALSE	TRUE	FALSE
ENSMUSG00000031790	Mmp15	0.465244	16.6345	1.47909	876.036	FALSE	TRUE	FALSE
ENSMUSG00000031803	B3gnt3	0.10118	0.793825	2.23938	453.751	FALSE	TRUE	FALSE
ENSMUSG00000031910	Has3	-0.822531	19.4313	-1.66126	124.521	FALSE	TRUE	FALSE
ENSMUSG00000031937	Vstm5	1.17716	33.3157	2.56021	292.664	FALSE	TRUE	FALSE
ENSMUSG00000031965	Tbx20	0.41195	5.90496	1.93461	190.149	FALSE	TRUE	FALSE
ENSMUSG00000031994	Adamts8	0.404675	5.50822	-2.10998	217.137	FALSE	TRUE	FALSE
ENSMUSG00000032024	Clmp	0.293528	6.76635	1.3729	410.165	FALSE	TRUE	FALSE
ENSMUSG00000032068	Plet1	0.535532	15.4325	2.14928	2217.13	FALSE	TRUE	FALSE
ENSMUSG00000032085	Tagln	1.18365	37.3663	-2.13841	1614.79	FALSE	TRUE	FALSE
ENSMUSG00000032118	Fez1	0.105353	2.17417	-1.96038	519.766	FALSE	TRUE	FALSE
ENSMUSG00000032291	Crabp1	-0.250234	4.0724	-2.83741	252.248	FALSE	TRUE	FALSE
ENSMUSG00000032322	Pstpip1	0.769929	27.6346	-1.77106	726.724	FALSE	TRUE	FALSE
ENSMUSG00000032359	Ctsh	0.65409	11.6601	2.89519	1837.36	FALSE	TRUE	FALSE
ENSMUSG00000032420	Nt5e	0.322294	6.30403	1.98495	706.166	FALSE	TRUE	FALSE
ENSMUSG00000032487	Ptgs2	1.04363	86.383	-2.23861	160.615	FALSE	TRUE	FALSE
ENSMUSG00000032494	Tdgf1	0.198576	17.6093	-1.38513	307.017	FALSE	TRUE	FALSE
ENSMUSG00000032495	Lrrc2	-0.359848	15.304	-1.60951	321.149	FALSE	TRUE	FALSE
ENSMUSG00000032666	1700025G04Rik	-0.0558476	0.573119	1.93828	1538.9	FALSE	TRUE	FALSE
ENSMUSG00000032796	Lama1	0.825565	86.2561	1.47992	87.5713	FALSE	TRUE	FALSE
ENSMUSG00000032849	Abcc4	0.0195917	0.327858	1.55351	383.805	FALSE	TRUE	FALSE
ENSMUSG00000032902	Slc16a1	-0.253885	16.6246	2.13875	1303.11	FALSE	TRUE	FALSE
ENSMUSG00000033032	Afap1l1	0.612885	12.7647	1.78731	532.461	FALSE	TRUE	FALSE
ENSMUSG00000033060	Lmo7	0.141055	4.6305	2.07296	1172.96	FALSE	TRUE	FALSE
ENSMUSG00000033066	Gas7	1.31041	72.2319	-1.55261	1275.76	FALSE	TRUE	FALSE
ENSMUSG00000033174	Mgll	1.10672	32.9326	1.55971	394.552	FALSE	TRUE	FALSE
ENSMUSG00000033213	AA467197	-0.108724	1.1664	1.41987	52.0499	FALSE	TRUE	FALSE
ENSMUSG00000033597	Caskin1	-0.391574	8.97167	2.8873	1466.42	FALSE	TRUE	FALSE
ENSMUSG00000033610	Pank1	-0.0471945	0.957943	-1.86125	303.777	FALSE	TRUE	FALSE
ENSMUSG00000033676	Gabrb3	-0.322814	7.03658	-1.71951	262.463	FALSE	TRUE	FALSE
ENSMUSG00000033768	Nrxn2	-0.360144	4.76805	2.3839	224.273	FALSE	TRUE	FALSE
ENSMUSG00000034040	Wbscr17	0.471712	7.22659	-1.72779	655.788	FALSE	TRUE	FALSE
ENSMUSG00000034258	Mfsd7c	0.635699	17.0934	1.50526	677.266	FALSE	TRUE	FALSE
ENSMUSG00000034295	Fhod3	0.0099018	0.104117	-1.56332	560.794	FALSE	TRUE	FALSE
ENSMUSG00000034320	Slc26a2	-0.0330631	0.492306	1.80704	1010.21	FALSE	TRUE	FALSE
ENSMUSG00000034391	Fbxo15	-0.334383	45.779	2.1331	208.054	FALSE	TRUE	FALSE
ENSMUSG00000034416	Pkd1l2	-0.234315	3.7619	1.65715	66.1513	FALSE	TRUE	FALSE
ENSMUSG00000034486	Gbx2	0.52425	19.6547	-1.42198	136.29	FALSE	TRUE	FALSE
ENSMUSG00000034613	Ppm1h	-0.252241	2.74127	-1.67905	540.952	FALSE	TRUE	FALSE
ENSMUSG00000034684	Sema3f	1.15459	34.8804	2.3072	1004.72	FALSE	TRUE	FALSE
ENSMUSG00000034758	Tle6	-0.31836	7.03658	1.65786	162.304	FALSE	TRUE	FALSE
ENSMUSG00000034947	Tmem106a	-0.506145	13.8238	1.38069	378.254	FALSE	TRUE	FALSE
ENSMUSG00000035000	Dpp4	0.641296	72.8936	1.69089	582.109	FALSE	TRUE	FALSE
ENSMUSG00000035158	Mitf	0.302042	10.0854	1.37584	146.936	FALSE	TRUE	FALSE
ENSMUSG00000035283	Adrb1	0.551165	8.30021	1.93577	144.128	FALSE	TRUE	FALSE
ENSMUSG00000035356	Nfkbiz	0.790562	26.6478	1.55635	419.526	FALSE	TRUE	FALSE
ENSMUSG00000035498	Cdcp1	0.570901	11.1088	1.37403	488.237	FALSE	TRUE	FALSE
ENSMUSG00000035504	Reep6	0.271308	7.57294	2.04578	326.777	FALSE	TRUE	FALSE
ENSMUSG00000035557	Krt17	0.356023	4.50745	-1.60445	72.3167	FALSE	TRUE	FALSE
ENSMUSG00000035697	Hmha1	0.0064306	0.0675303	1.8556	198.041	FALSE	TRUE	FALSE
ENSMUSG00000035769	Xylb	-0.280134	5.48973	1.39964	204.89	FALSE	TRUE	FALSE
ENSMUSG00000035783	Acta2	0.892239	18.9754	-1.88101	278.389	FALSE	TRUE	FALSE
ENSMUSG00000036242	3632451O06Rik	0.252213	4.04244	1.39323	297.451	FALSE	TRUE	FALSE
ENSMUSG00000036446	Lum	1.29658	36.9948	2.93566	461.736	FALSE	TRUE	FALSE
ENSMUSG00000036466	Megf11	-0.229545	2.5388	1.32478	58.8242	FALSE	TRUE	FALSE
ENSMUSG00000037020	Wdr62	-0.844563	136.824	1.75135	601.43	FALSE	TRUE	FALSE
ENSMUSG00000037033	Clca3b	0.324575	5.67648	1.35144	81.6173	FALSE	TRUE	FALSE
ENSMUSG00000037035	Inhbb	0.922426	40.7131	2.58763	995.747	FALSE	TRUE	FALSE
ENSMUSG00000037139	Myom3	-0.436273	7.53547	2.07489	146.292	FALSE	TRUE	FALSE
ENSMUSG00000037279	Ovol2	-0.261305	2.75305	1.71547	121.497	FALSE	TRUE	FALSE
ENSMUSG00000037280	Galnt6	0.587543	80.3251	1.58563	754.613	FALSE	TRUE	FALSE
ENSMUSG00000037295	Ldlrap1	0.677167	29.0089	1.66327	1018.19	FALSE	TRUE	FALSE
ENSMUSG00000037315	Jade3	-0.549034	50.6529	1.5296	1167.15	FALSE	TRUE	FALSE
ENSMUSG00000037440	Vnn1	1.02935	33.4393	2.81913	1623.18	FALSE	TRUE	FALSE
ENSMUSG00000037463	Fbxo27	0.294886	4.38484	1.55202	297.631	FALSE	TRUE	FALSE
ENSMUSG00000037600	Kdf1	0.0173708	0.138765	1.32231	151.59	FALSE	TRUE	FALSE
ENSMUSG00000037686	Aspg	0.685445	12.0467	1.60422	130.216	FALSE	TRUE	FALSE
ENSMUSG00000037989	Wnk2	0.0651077	0.500629	2.40039	936.631	FALSE	TRUE	FALSE
ENSMUSG00000038009	Dnajc22	-0.448009	6.75976	1.62599	167.945	FALSE	TRUE	FALSE
ENSMUSG00000038143	Stox2	0.0861597	1.03424	-1.35403	774.973	FALSE	TRUE	FALSE
ENSMUSG00000038151	Prdm1	0.407682	7.20035	1.37877	87.7152	FALSE	TRUE	FALSE
ENSMUSG00000038239	Hrc	0.938918	27.22	1.5422	57.9144	FALSE	TRUE	FALSE
ENSMUSG00000038264	Sema7a	0.98817	30.908	1.79877	444.402	FALSE	TRUE	FALSE
ENSMUSG00000038508	Gdf15	0.885798	28.75	-2.4821	528.071	FALSE	TRUE	FALSE
ENSMUSG00000038576	Susd4	0.962881	29.2295	1.43344	291.158	FALSE	TRUE	FALSE
ENSMUSG00000038600	Atp6v0a4	-0.377363	5.71924	2.2577	189.295	FALSE	TRUE	FALSE
ENSMUSG00000038618	Rassf7	0.197012	6.22025	1.34843	335.996	FALSE	TRUE	FALSE
ENSMUSG00000038775	Vill	0.350693	9.12399	1.81967	210.707	FALSE	TRUE	FALSE
ENSMUSG00000038843	Gcnt1	0.862517	42.0904	1.34248	580.861	FALSE	TRUE	FALSE
ENSMUSG00000038859	Baiap2l1	0.575526	8.6118	1.83413	632.234	FALSE	TRUE	FALSE
ENSMUSG00000039116	Adgrg6	0.326857	4.46017	2.31467	2153.21	FALSE	TRUE	FALSE
ENSMUSG00000039209	Rpl39l	0.38004	28.5696	1.55784	166.604	FALSE	TRUE	FALSE
ENSMUSG00000039238	Zfp750	0.447076	12.942	-1.94078	656.403	FALSE	TRUE	FALSE
ENSMUSG00000039252	Lgi2	-0.166303	1.51249	1.51828	257.671	FALSE	TRUE	FALSE
ENSMUSG00000039347	Atp6v0e2	-0.00502128	0.0663627	-1.37602	423.66	FALSE	TRUE	FALSE
ENSMUSG00000039395	Mreg	-0.357412	22.4553	1.46663	333.399	FALSE	TRUE	FALSE
ENSMUSG00000039616	Mocos	-0.992559	33.0589	-1.3422	100.683	FALSE	TRUE	FALSE
ENSMUSG00000039621	Prex1	0.0899714	1.95168	2.43973	1263.1	FALSE	TRUE	FALSE
ENSMUSG00000039716	Dock3	-0.826329	18.7549	-1.63811	160.574	FALSE	TRUE	FALSE
ENSMUSG00000039910	Cited2	0.759693	46.9215	1.6019	1832.02	FALSE	TRUE	FALSE
ENSMUSG00000039959	Hip1	-0.168433	7.36663	-1.37818	1286.64	FALSE	TRUE	FALSE
ENSMUSG00000040118	Cacna2d1	0.175712	2.47054	-1.6545	970.158	FALSE	TRUE	FALSE
ENSMUSG00000040133	Gpr176	0.641584	10.6127	-2.03778	368.101	FALSE	TRUE	FALSE
ENSMUSG00000040152	Thbs1	1.25065	36.8725	-1.62814	121.944	FALSE	TRUE	FALSE
ENSMUSG00000040345	Arhgap9	0.691379	25.8874	2.25646	263.403	FALSE	TRUE	FALSE
ENSMUSG00000040434	Gyltl1b	0.24139	6.48227	2.05953	464.229	FALSE	TRUE	FALSE
ENSMUSG00000040498	Igsf23	0.268448	3.0767	1.88607	54.1598	FALSE	TRUE	FALSE
ENSMUSG00000040564	Apoc1	0.69478	68.077	2.42714	297.432	FALSE	TRUE	FALSE
ENSMUSG00000040703	Cyp2s1	0.449176	12.3732	1.66675	928.223	FALSE	TRUE	FALSE
ENSMUSG00000040728	Esrp1	-1.08435	32.4191	1.45897	270.129	FALSE	TRUE	FALSE
ENSMUSG00000041119	Pde9a	0.971665	25.4418	1.68206	68.6965	FALSE	TRUE	FALSE
ENSMUSG00000041287	Sox15	-0.0992999	1.7946	1.63728	89.9133	FALSE	TRUE	FALSE
ENSMUSG00000041323	Ak7	-0.190896	3.70495	2.71292	202.179	FALSE	TRUE	FALSE
ENSMUSG00000041372	B4galnt3	-0.0936017	2.18947	1.56931	150.55	FALSE	TRUE	FALSE
ENSMUSG00000041488	Stx3	0.422941	32.7446	1.3874	643.196	FALSE	TRUE	FALSE
ENSMUSG00000041556	Fbxo2	-0.527198	10.4068	1.4796	159.003	FALSE	TRUE	FALSE
ENSMUSG00000041577	Prelp	1.03373	24.7471	1.96275	213.875	FALSE	TRUE	FALSE
ENSMUSG00000041594	Tmtc4	-0.325882	8.81897	-1.67386	798.403	FALSE	TRUE	FALSE
ENSMUSG00000041757	Plekha6	0.622254	12.0262	1.78082	1544.89	FALSE	TRUE	FALSE
ENSMUSG00000041817	Fam169a	-0.651678	47.7286	1.81673	601.647	FALSE	TRUE	FALSE
ENSMUSG00000042035	Igsf3	0.330936	8.03895	1.52935	624.1	FALSE	TRUE	FALSE
ENSMUSG00000042099	Kank3	-0.123269	2.20827	1.66571	700.766	FALSE	TRUE	FALSE
ENSMUSG00000042129	Rassf4	0.134564	1.37612	2.57825	933.035	FALSE	TRUE	FALSE
ENSMUSG00000042228	Lyn	0.518411	7.77562	-1.60303	351.137	FALSE	TRUE	FALSE
ENSMUSG00000042246	Tmc7	0.0629979	0.622101	1.58367	268.963	FALSE	TRUE	FALSE
ENSMUSG00000042357	Gjb5	0.378431	5.99914	2.36789	674.389	FALSE	TRUE	FALSE
ENSMUSG00000042367	Gjb3	0.463976	35.7762	3.28193	1140.19	FALSE	TRUE	FALSE
ENSMUSG00000042510	AA986860	0.994796	25.7359	1.41686	313.833	FALSE	TRUE	FALSE
ENSMUSG00000042684	Npl	-0.00157718	0.0280453	1.68433	219.822	FALSE	TRUE	FALSE
ENSMUSG00000042759	Apobr	0.279611	4.30305	1.47268	721.857	FALSE	TRUE	FALSE
ENSMUSG00000042903	Foxo4	0.0172484	0.269768	1.81273	1696.59	FALSE	TRUE	FALSE
ENSMUSG00000043085	Tmem82	0.0899546	0.764455	1.53244	107.539	FALSE	TRUE	FALSE
ENSMUSG00000043110	Lrrn4	-0.2576	4.32239	1.99977	425.748	FALSE	TRUE	FALSE
ENSMUSG00000043439	E130012A19Rik	-0.0184579	0.214621	1.52307	650.431	FALSE	TRUE	FALSE
ENSMUSG00000043924	Ncmap	-0.343781	3.99145	2.04478	175.774	FALSE	TRUE	FALSE
ENSMUSG00000044117	2900011O08Rik	-0.470983	9.33439	-1.45742	109.889	FALSE	TRUE	FALSE
ENSMUSG00000044317	Gpr4	0.759416	17.2309	1.62037	124.331	FALSE	TRUE	FALSE
ENSMUSG00000044393	Dsg2	-0.304401	18.3152	2.34953	2521.06	FALSE	TRUE	FALSE
ENSMUSG00000044461	Shisa2	1.13876	72.3096	2.32154	399.967	FALSE	TRUE	FALSE
ENSMUSG00000044468	Fam46c	-0.102484	1.21429	1.33674	197.023	FALSE	TRUE	FALSE
ENSMUSG00000044595	Dnd1	-0.535246	17.0179	-1.53146	196.31	FALSE	TRUE	FALSE
ENSMUSG00000044626	Liph	-0.0543294	0.929215	1.48512	387.982	FALSE	TRUE	FALSE
ENSMUSG00000044628	Rnf208	0.0650437	0.716445	1.60393	138.54	FALSE	TRUE	FALSE
ENSMUSG00000044646	Zbtb7c	1.0761	28.8126	-1.35791	614.345	FALSE	TRUE	FALSE
ENSMUSG00000044768	D1Ertd622e	-0.0828846	1.25452	-1.45102	234.34	FALSE	TRUE	FALSE
ENSMUSG00000044788	Fads6	0.75826	46.1422	1.54247	159.35	FALSE	TRUE	FALSE
ENSMUSG00000045179	Sox3	-0.277537	3.85022	1.6616	63.7813	FALSE	TRUE	FALSE
ENSMUSG00000045294	Insig1	-0.00972942	0.152786	1.36664	467.711	FALSE	TRUE	FALSE
ENSMUSG00000045314	Sowahb	0.622989	11.88	1.39432	235.965	FALSE	TRUE	FALSE
ENSMUSG00000045319	Proser2	0.477907	8.77229	1.72222	401.118	FALSE	TRUE	FALSE
ENSMUSG00000045573	Penk	1.14031	32.1136	-1.66431	161.746	FALSE	TRUE	FALSE
ENSMUSG00000045672	Col27a1	0.876951	19.2428	1.77989	896.16	FALSE	TRUE	FALSE
ENSMUSG00000046133	C130073F10Rik	-0.359698	5.53473	2.04172	91.6598	FALSE	TRUE	FALSE
ENSMUSG00000046179	E2f8	0.0411888	0.628042	1.42495	489.319	FALSE	TRUE	FALSE
ENSMUSG00000046410	Kcnk6	0.0624395	0.572426	1.48739	332.813	FALSE	TRUE	FALSE
ENSMUSG00000046727	Cystm1	0.217268	5.94639	1.56386	822.194	FALSE	TRUE	FALSE
ENSMUSG00000047409	Ctdspl	0.529914	8.27172	1.57212	759.633	FALSE	TRUE	FALSE
ENSMUSG00000047878	A4galt	-0.614554	14.9116	1.51215	384.09	FALSE	TRUE	FALSE
ENSMUSG00000048087	Gm4737	-0.415891	54.318	-2.33726	1435.31	FALSE	TRUE	FALSE
ENSMUSG00000048096	Lmod1	0.755794	14.4094	-2.19287	1704.31	FALSE	TRUE	FALSE
ENSMUSG00000048126	Col6a3	0.690762	15.9169	1.76748	935.586	FALSE	TRUE	FALSE
ENSMUSG00000048373	Fgfbp1	0.357891	4.38983	2.16435	240.86	FALSE	TRUE	FALSE
ENSMUSG00000048538	Gm9826	-0.41861	37.9837	-2.33784	553.309	FALSE	TRUE	FALSE
ENSMUSG00000048915	Efna5	0.412336	5.40327	-1.71103	600.243	FALSE	TRUE	FALSE
ENSMUSG00000049382	Krt8	0.477421	9.65802	1.53067	1477.61	FALSE	TRUE	FALSE
ENSMUSG00000050106	Tmc8	-0.116005	1.20131	1.62196	131.452	FALSE	TRUE	FALSE
ENSMUSG00000050240	Hic2	-0.0390493	1.35913	2.05455	1406.71	FALSE	TRUE	FALSE
ENSMUSG00000050761	Gp1bb	0.600002	9.13585	1.75429	379.607	FALSE	TRUE	FALSE
ENSMUSG00000050777	Tmem37	0.326455	5.01613	1.76105	895.968	FALSE	TRUE	FALSE
ENSMUSG00000050931	Sgms2	0.338664	5.51162	1.92117	401.339	FALSE	TRUE	FALSE
ENSMUSG00000050966	Lin28a	-0.709447	47.5188	2.58603	210.003	FALSE	TRUE	FALSE
ENSMUSG00000051159	Cited1	-0.117364	1.60495	1.75184	825.491	FALSE	TRUE	FALSE
ENSMUSG00000051176	Zfp42	0.0895729	1.85017	1.83617	238.312	FALSE	TRUE	FALSE
ENSMUSG00000051379	Flrt3	0.36221	10.3572	1.39869	765.383	FALSE	TRUE	FALSE
ENSMUSG00000052180	Serpinb6c	0.0545797	0.872892	1.69257	363.233	FALSE	TRUE	FALSE
ENSMUSG00000052331	Ankrd44	-0.488873	11.1587	-1.63215	1004.48	FALSE	TRUE	FALSE
ENSMUSG00000052397	Ezr	0.0389883	1.74155	1.43429	1413.91	FALSE	TRUE	FALSE
ENSMUSG00000052852	Reep1	0.324763	11.4806	-1.32891	346.106	FALSE	TRUE	FALSE
ENSMUSG00000052854	Nrk	-0.275057	4.23744	2.21354	2271.14	FALSE	TRUE	FALSE
ENSMUSG00000053062	Jam2	-0.171945	9.48828	-1.80476	339.549	FALSE	TRUE	FALSE
ENSMUSG00000053559	Smagp	0.559556	26.1207	1.73767	315.093	FALSE	TRUE	FALSE
ENSMUSG00000054150	Syne3	0.272132	2.86183	1.47529	56.7417	FALSE	TRUE	FALSE
ENSMUSG00000054385	Ceacam2	0.250014	3.05087	2.16059	176.992	FALSE	TRUE	FALSE
ENSMUSG00000054727	1700013H16Rik	-1.05876	40.564	-1.63346	158.833	FALSE	TRUE	FALSE
ENSMUSG00000054753	AU018091	-0.180588	7.3066	2.25789	866.117	FALSE	TRUE	FALSE
ENSMUSG00000054889	Dsp	-0.555648	22.0457	1.91017	1642.2	FALSE	TRUE	FALSE
ENSMUSG00000054893	Zfp667	-0.383357	12.0153	1.47019	309.277	FALSE	TRUE	FALSE
ENSMUSG00000055936	#N/A	-0.189413	2.74753	2.22773	1072.75	FALSE	TRUE	FALSE
ENSMUSG00000056004	9330182L06Rik	0.259957	3.34871	-1.60923	166.31	FALSE	TRUE	FALSE
ENSMUSG00000056220	Pla2g4a	1.24543	46.5637	-1.50721	928.618	FALSE	TRUE	FALSE
ENSMUSG00000056411	Gm12500	0.286662	3.86848	1.42842	62.8638	FALSE	TRUE	FALSE
ENSMUSG00000056413	Adap1	-0.493584	43.9345	1.89435	149.459	FALSE	TRUE	FALSE
ENSMUSG00000056436	Cyct	-0.868564	48.5267	-2.11622	454.6	FALSE	TRUE	FALSE
ENSMUSG00000056888	Glipr1	0.191427	4.47645	2.46404	1462.85	FALSE	TRUE	FALSE
ENSMUSG00000057000	Nxf3	-1.03581	107.752	-2.45663	832.658	FALSE	TRUE	FALSE
ENSMUSG00000057378	Ryr3	-0.368128	10.8351	-1.62822	81.2778	FALSE	TRUE	FALSE
ENSMUSG00000057719	Sh3rf2	0.280877	5.04617	1.66117	200.341	FALSE	TRUE	FALSE
ENSMUSG00000057751	Megf6	-0.303898	5.12907	1.59529	504.684	FALSE	TRUE	FALSE
ENSMUSG00000057948	Unc13d	-0.0518164	0.659297	1.56045	143.228	FALSE	TRUE	FALSE
ENSMUSG00000058806	Col13a1	0.525797	10.1271	1.4544	128.392	FALSE	TRUE	FALSE
ENSMUSG00000059022	Kcp	0.478462	8.22828	1.32518	287.043	FALSE	TRUE	FALSE
ENSMUSG00000059430	Actg2	0.622584	11.8806	-1.64524	117.696	FALSE	TRUE	FALSE
ENSMUSG00000060461	Dppa5a	0.308429	16.8543	1.65031	181.517	FALSE	TRUE	FALSE
ENSMUSG00000061186	Sfmbt2	-1.05975	42.6104	1.93566	2113.61	FALSE	TRUE	FALSE
ENSMUSG00000061232	H2-K1	-0.401207	22.9571	1.41702	734.557	FALSE	TRUE	FALSE
ENSMUSG00000061393	Acvr2b	-0.157691	3.46955	1.59643	241.079	FALSE	TRUE	FALSE
ENSMUSG00000061576	Dpp6	0.827022	15.9622	-1.39713	126.576	FALSE	TRUE	FALSE
ENSMUSG00000061601	Pclo	-0.713596	13.7577	-1.62356	68.6301	FALSE	TRUE	FALSE
ENSMUSG00000062157	Ifnlr1	0.0104587	0.0877616	1.54407	452.645	FALSE	TRUE	FALSE
ENSMUSG00000062859	Tcp11	-0.479234	10.7708	1.79724	64.4227	FALSE	TRUE	FALSE
ENSMUSG00000063018	2010204K13Rik	0.0658533	0.586648	1.3308	210.874	FALSE	TRUE	FALSE
ENSMUSG00000063354	Slc39a4	0.328318	17.2293	2.19333	638.162	FALSE	TRUE	FALSE
ENSMUSG00000063632	Sox11	-0.564424	31.1731	-1.46439	382.137	FALSE	TRUE	FALSE
ENSMUSG00000063804	Lin28b	-0.986869	60.5587	-1.63438	80.4179	FALSE	TRUE	FALSE
ENSMUSG00000063919	Srrm4	0.263733	3.68007	-1.52879	293.737	FALSE	TRUE	FALSE
ENSMUSG00000063972	Nr6a1	-0.840656	114.144	1.8686	503.399	FALSE	TRUE	FALSE
ENSMUSG00000064080	Fbln2	0.66578	11.0957	-1.81126	369.284	FALSE	TRUE	FALSE
ENSMUSG00000064194	Zfp936	0.117986	3.0387	1.33843	92.5022	FALSE	TRUE	FALSE
ENSMUSG00000064264	Zfp428	-0.389236	21.9958	-1.81496	297.515	FALSE	TRUE	FALSE
ENSMUSG00000064337	mt-Rnr1	0.540383	47.417	1.33532	924.425	FALSE	TRUE	FALSE
ENSMUSG00000066113	Adamtsl1	1.03758	28.329	-2.24243	1660.8	FALSE	TRUE	FALSE
ENSMUSG00000066438	Plekhd1	-0.29539	5.93572	1.47932	188.804	FALSE	TRUE	FALSE
ENSMUSG00000066861	Oas1g	-0.759429	31.2607	-1.65067	171.219	FALSE	TRUE	FALSE
ENSMUSG00000067276	Capn6	0.656994	15.3146	-1.81167	1307.28	FALSE	TRUE	FALSE
ENSMUSG00000067338	Tuba3b	-0.234993	4.29356	-2.47287	196.326	FALSE	TRUE	FALSE
ENSMUSG00000067389	Gm17080	0.338628	9.1131	2.12856	406.335	FALSE	TRUE	FALSE
ENSMUSG00000067561	Dmrtc1c2	-0.745105	54.4048	2.2527	116.01	FALSE	TRUE	FALSE
ENSMUSG00000067562	Dmrtc1c1	-0.714462	60.0348	2.14909	104.154	FALSE	TRUE	FALSE
ENSMUSG00000067702	Tuba3a	-0.148201	2.14995	-2.82892	333.694	FALSE	TRUE	FALSE
ENSMUSG00000067818	Myl9	1.01201	32.3724	-1.74477	1129.31	FALSE	TRUE	FALSE
ENSMUSG00000067873	Htatsf1	0.141129	5.44416	1.41162	1151	FALSE	TRUE	FALSE
ENSMUSG00000068735	Trp53i11	0.562522	14.1324	1.34438	382.399	FALSE	TRUE	FALSE
ENSMUSG00000068748	Ptprz1	0.776676	14.7114	-1.32566	232.866	FALSE	TRUE	FALSE
ENSMUSG00000068762	Gstm6	0.614486	18.0016	1.44441	150.358	FALSE	TRUE	FALSE
ENSMUSG00000068876	Cgn	-0.143524	3.91259	1.74911	757.609	FALSE	TRUE	FALSE
ENSMUSG00000069053	Uba1y	-0.249705	9.80336	-1.69843	195.552	FALSE	TRUE	FALSE
ENSMUSG00000069601	Ank3	0.292483	5.12907	1.33595	181.642	FALSE	TRUE	FALSE
ENSMUSG00000069620	Gm5250	0.351263	26.8914	1.53375	66.6816	FALSE	TRUE	FALSE
ENSMUSG00000070644	Etnk2	0.105754	1.14097	1.77889	69.0248	FALSE	TRUE	FALSE
ENSMUSG00000070780	Rbm47	-0.160349	3.33267	1.38699	340.807	FALSE	TRUE	FALSE
ENSMUSG00000071369	Map3k5	0.188968	3.69384	1.66881	380.771	FALSE	TRUE	FALSE
ENSMUSG00000071964	#N/A	-0.249705	9.80336	-1.69843	195.552	FALSE	TRUE	FALSE
ENSMUSG00000072214	42618	0.70849	16.8243	1.64379	846.768	FALSE	TRUE	FALSE
ENSMUSG00000072244	Trim6	0.186941	6.56827	1.79744	862.707	FALSE	TRUE	FALSE
ENSMUSG00000073408	Dpcr1	-0.424424	5.50611	2.60242	636.598	FALSE	TRUE	FALSE
ENSMUSG00000073411	H2-D1	0.0319239	0.408801	1.74939	1489.28	FALSE	TRUE	FALSE
ENSMUSG00000073421	H2-Ab1	0.690394	14.473	2.46588	163.307	FALSE	TRUE	FALSE
ENSMUSG00000074207	Adh1	-0.178293	2.04816	-1.8362	392.006	FALSE	TRUE	FALSE
ENSMUSG00000074259	Gramd2	-0.0133338	0.144731	2.72812	536.664	FALSE	TRUE	FALSE
ENSMUSG00000074272	Ceacam1	0.709314	21.0167	2.36819	637.13	FALSE	TRUE	FALSE
ENSMUSG00000074303	#N/A	0.367441	17.2309	2.1385	791.249	FALSE	TRUE	FALSE
ENSMUSG00000074489	Bglap3	-0.245906	2.91282	2.39065	256.848	FALSE	TRUE	FALSE
ENSMUSG00000074736	Syndig1	1.16042	45.2385	-1.781	180.015	FALSE	TRUE	FALSE
ENSMUSG00000075707	Dio3	0.811906	24.7787	2.29558	136.627	FALSE	TRUE	FALSE
ENSMUSG00000078670	Fam174b	0.960258	51.1593	-1.4704	191.777	FALSE	TRUE	FALSE
ENSMUSG00000078937	Cpt1b	0.174267	2.00982	1.7155	170.631	FALSE	TRUE	FALSE
ENSMUSG00000078954	Arhgap8	0.325744	6.14348	2.16259	510.56	FALSE	TRUE	FALSE
ENSMUSG00000079259	Trim71	-0.186302	4.84429	2.02315	332.96	FALSE	TRUE	FALSE
ENSMUSG00000079445	B3gnt7	-0.11643	1.69187	1.67064	679.885	FALSE	TRUE	FALSE
ENSMUSG00000081044	AU015836	-0.197824	2.91325	2.22773	1072.75	FALSE	TRUE	FALSE
ENSMUSG00000081965	Gm11620	0.0497857	0.583007	1.76624	68.7128	FALSE	TRUE	FALSE
ENSMUSG00000083657	Gm12245	-0.10431	1.73609	1.42842	86.6837	FALSE	TRUE	FALSE
ENSMUSG00000085006	BC021767	-0.10981	1.08578	1.60578	243.001	FALSE	TRUE	FALSE
ENSMUSG00000085009	Gm12977	-0.149385	2.29434	1.36886	68.1693	FALSE	TRUE	FALSE
ENSMUSG00000085106	Gm16000	0.583406	13.218	-1.43471	155.911	FALSE	TRUE	FALSE
ENSMUSG00000085309	#N/A	0.495028	18.6516	1.76271	165.977	FALSE	TRUE	FALSE
ENSMUSG00000085595	Gm16090	-0.142273	1.77997	2.41338	437.679	FALSE	TRUE	FALSE
ENSMUSG00000085974	#N/A	0.97377	28.2029	2.5643	97.3712	FALSE	TRUE	FALSE
ENSMUSG00000086780	#N/A	0.207751	2.17233	1.48916	84.5493	FALSE	TRUE	FALSE
ENSMUSG00000086844	B230206H07Rik	-0.0027263	0.032824	1.60795	992.783	FALSE	TRUE	FALSE
ENSMUSG00000087135	Gm16096	0.253031	3.71894	1.50973	133.732	FALSE	TRUE	FALSE
ENSMUSG00000087166	L1td1	0.00340804	0.0385553	1.74262	469.875	FALSE	TRUE	FALSE
ENSMUSG00000090062	Galnt6os	0.724157	42.2291	1.51175	77.575	FALSE	TRUE	FALSE
ENSMUSG00000091106	#N/A	-0.0949948	4.09163	2.09715	1015.05	FALSE	TRUE	FALSE
ENSMUSG00000091243	Vgll3	1.14989	45.0797	-1.59225	543.816	FALSE	TRUE	FALSE
ENSMUSG00000091387	Gcnt4	0.586789	23.1776	2.12118	317.949	FALSE	TRUE	FALSE
ENSMUSG00000091479	Gm17035	0.279711	2.93895	1.35973	287.995	FALSE	TRUE	FALSE
ENSMUSG00000091490	Triml2	0.0908576	4.20388	1.84477	321.654	FALSE	TRUE	FALSE
ENSMUSG00000091594	Gm17067	-0.213984	10.759	1.63757	172.202	FALSE	TRUE	FALSE
ENSMUSG00000092193	Cd9-ps	0.345243	5.531	1.72526	98.2279	FALSE	TRUE	FALSE
ENSMUSG00000092327	#N/A	0.883598	18.4815	-1.88387	541.212	FALSE	TRUE	FALSE
ENSMUSG00000092335	Gm7221	0.128097	2.79126	1.78109	114.061	FALSE	TRUE	FALSE
ENSMUSG00000092627	D130058E05Rik	0.552583	13.6462	-1.32547	57.6404	FALSE	TRUE	FALSE
ENSMUSG00000092837	Rpph1	-0.46103	9.80167	-1.54036	56.2547	FALSE	TRUE	FALSE
ENSMUSG00000000223	Drp2	0	NA	1.49984	201.988	FALSE	TRUE	FALSE
ENSMUSG00000000385	Tmprss2	0	NA	2.26671	1285.68	FALSE	TRUE	FALSE
ENSMUSG00000000392	Fap	0	NA	2.24446	186.385	FALSE	TRUE	FALSE
ENSMUSG00000000440	Pparg	0	NA	1.55146	349.8	FALSE	TRUE	FALSE
ENSMUSG00000000690	Hoxb6	0	NA	-1.78644	222.071	FALSE	TRUE	FALSE
ENSMUSG00000000805	Car4	0	NA	1.91551	1016.79	FALSE	TRUE	FALSE
ENSMUSG00000000942	Hoxa4	0	NA	-1.38234	535.223	FALSE	TRUE	FALSE
ENSMUSG00000001166	Oas1c	0	NA	1.73263	360.584	FALSE	TRUE	FALSE
ENSMUSG00000001510	Dlx3	0	NA	2.28617	310.817	FALSE	TRUE	FALSE
ENSMUSG00000001741	Il16	0	NA	1.40319	56.8296	FALSE	TRUE	FALSE
ENSMUSG00000001901	Kcnh6	0	NA	1.40961	50.584	FALSE	TRUE	FALSE
ENSMUSG00000001946	Esam	0	NA	1.68371	589.866	FALSE	TRUE	FALSE
ENSMUSG00000002100	Mybpc3	0	NA	3.31953	618.464	FALSE	TRUE	FALSE
ENSMUSG00000002944	Cd36	0	NA	2.10128	160.298	FALSE	TRUE	FALSE
ENSMUSG00000003341	Atp8b3	0	NA	1.62099	76.97	FALSE	TRUE	FALSE
ENSMUSG00000003484	Cyp4f18	0	NA	2.49098	93.6809	FALSE	TRUE	FALSE
ENSMUSG00000003505	Psg18	0	NA	3.66329	459.52	FALSE	TRUE	FALSE
ENSMUSG00000003555	Cyp17a1	0	NA	3.85136	314.796	FALSE	TRUE	FALSE
ENSMUSG00000004366	Sst	0	NA	-2.07665	130.071	FALSE	TRUE	FALSE
ENSMUSG00000004540	Psg17	0	NA	2.11759	163.775	FALSE	TRUE	FALSE
ENSMUSG00000004542	Psg19	0	NA	2.36118	347.425	FALSE	TRUE	FALSE
ENSMUSG00000004655	Aqp1	0	NA	2.67625	557.144	FALSE	TRUE	FALSE
ENSMUSG00000004791	Pgf	0	NA	2.28348	468.092	FALSE	TRUE	FALSE
ENSMUSG00000005057	Sh2b2	0	NA	2.13429	534.65	FALSE	TRUE	FALSE
ENSMUSG00000005268	Prlr	0	NA	2.14063	207.858	FALSE	TRUE	FALSE
ENSMUSG00000005952	Trpv1	0	NA	1.71127	52.4068	FALSE	TRUE	FALSE
ENSMUSG00000006200	Rhox6	0	NA	1.51088	1030.49	FALSE	TRUE	FALSE
ENSMUSG00000006362	Cbfa2t3	0	NA	1.55023	140.226	FALSE	TRUE	FALSE
ENSMUSG00000006488	Prl7a1	0	NA	1.68954	83.1561	FALSE	TRUE	FALSE
ENSMUSG00000006490	Prl8a9	0	NA	5.74863	2862.8	FALSE	TRUE	FALSE
ENSMUSG00000006777	Krt23	0	NA	1.529	78.6737	FALSE	TRUE	FALSE
ENSMUSG00000007030	Vwa7	0	NA	2.0466	91.227	FALSE	TRUE	FALSE
ENSMUSG00000007279	Scube2	0	NA	1.88883	188.666	FALSE	TRUE	FALSE
ENSMUSG00000007805	Twist2	0	NA	1.55497	213.186	FALSE	TRUE	FALSE
ENSMUSG00000007908	Hmgcll1	0	NA	-1.85306	381.465	FALSE	TRUE	FALSE
ENSMUSG00000008601	Rab25	0	NA	-1.69126	59.7543	FALSE	TRUE	FALSE
ENSMUSG00000008789	Ceacam5	0	NA	5.94774	887.267	FALSE	TRUE	FALSE
ENSMUSG00000009378	Slc16a12	0	NA	-2.32221	2053.85	FALSE	TRUE	FALSE
ENSMUSG00000009646	Pla2g12b	0	NA	2.90841	457.104	FALSE	TRUE	FALSE
ENSMUSG00000010086	Rnf112	0	NA	2.13225	94.06	FALSE	TRUE	FALSE
ENSMUSG00000010529	Gm266	0	NA	2.15052	107.765	FALSE	TRUE	FALSE
ENSMUSG00000010601	Apol7a	0	NA	2.18121	296.851	FALSE	TRUE	FALSE
ENSMUSG00000011463	Cpb1	0	NA	1.51375	46.9654	FALSE	TRUE	FALSE
ENSMUSG00000013611	Snx31	0	NA	-2.34585	209.855	FALSE	TRUE	FALSE
ENSMUSG00000015627	Gata5	0	NA	1.73992	132.627	FALSE	TRUE	FALSE
ENSMUSG00000015966	Il17rb	0	NA	3.03842	393.685	FALSE	TRUE	FALSE
ENSMUSG00000015970	Chdh	0	NA	2.83325	1218.76	FALSE	TRUE	FALSE
ENSMUSG00000016942	Tmprss6	0	NA	1.33832	105.044	FALSE	TRUE	FALSE
ENSMUSG00000017868	Sgk2	0	NA	2.70098	284.252	FALSE	TRUE	FALSE
ENSMUSG00000017950	Hnf4a	0	NA	1.41693	194.524	FALSE	TRUE	FALSE
ENSMUSG00000018500	Adora2b	0	NA	-2.13863	768.028	FALSE	TRUE	FALSE
ENSMUSG00000018822	Sfrp5	0	NA	1.62558	194.519	FALSE	TRUE	FALSE
ENSMUSG00000019278	Dpep1	0	NA	2.36983	107.636	FALSE	TRUE	FALSE
ENSMUSG00000019756	Prl8a1	0	NA	4.37527	287.261	FALSE	TRUE	FALSE
ENSMUSG00000019900	Rfx6	0	NA	2.88185	276.385	FALSE	TRUE	FALSE
ENSMUSG00000019936	Epyc	0	NA	-2.49411	250.13	FALSE	TRUE	FALSE
ENSMUSG00000019987	Arg1	0	NA	-1.48204	68.3766	FALSE	TRUE	FALSE
ENSMUSG00000020077	Srgn	0	NA	1.60629	576.527	FALSE	TRUE	FALSE
ENSMUSG00000020080	Hkdc1	0	NA	2.15056	237.479	FALSE	TRUE	FALSE
ENSMUSG00000020101	4632428N05Rik	0	NA	1.7022	923.99	FALSE	TRUE	FALSE
ENSMUSG00000020154	Ptprb	0	NA	2.31003	388.595	FALSE	TRUE	FALSE
ENSMUSG00000020159	Gabrp	0	NA	-1.94353	181.172	FALSE	TRUE	FALSE
ENSMUSG00000020183	Cpm	0	NA	1.36381	453.827	FALSE	TRUE	FALSE
ENSMUSG00000020411	Nipal4	0	NA	-2.09555	1297.03	FALSE	TRUE	FALSE
ENSMUSG00000020429	Igfbp1	0	NA	-3.50544	469.669	FALSE	TRUE	FALSE
ENSMUSG00000020486	42617	0	NA	1.97245	955.042	FALSE	TRUE	FALSE
ENSMUSG00000020609	Apob	0	NA	3.8385	457.695	FALSE	TRUE	FALSE
ENSMUSG00000020620	Abca8b	0	NA	1.99144	275.423	FALSE	TRUE	FALSE
ENSMUSG00000020641	Rsad2	0	NA	2.03933	1027.11	FALSE	TRUE	FALSE
ENSMUSG00000020682	Mmp28	0	NA	1.5602	67.3318	FALSE	TRUE	FALSE
ENSMUSG00000020701	Tmem132e	0	NA	1.99799	141.379	FALSE	TRUE	FALSE
ENSMUSG00000020723	Cacng4	0	NA	1.78855	96.2247	FALSE	TRUE	FALSE
ENSMUSG00000020805	Slc13a5	0	NA	1.84591	66.41	FALSE	TRUE	FALSE
ENSMUSG00000020810	Cygb	0	NA	2.66525	665.456	FALSE	TRUE	FALSE
ENSMUSG00000020826	Nos2	0	NA	3.19774	1073.51	FALSE	TRUE	FALSE
ENSMUSG00000020838	Slc6a4	0	NA	2.31116	154.466	FALSE	TRUE	FALSE
ENSMUSG00000020901	Pik3r5	0	NA	-1.40538	93.6885	FALSE	TRUE	FALSE
ENSMUSG00000021087	Rtn1	0	NA	2.39036	736.007	FALSE	TRUE	FALSE
ENSMUSG00000021108	Prkch	0	NA	1.56386	404.448	FALSE	TRUE	FALSE
ENSMUSG00000021123	Rdh12	0	NA	1.61582	96.6335	FALSE	TRUE	FALSE
ENSMUSG00000021208	Ifi27l2b	0	NA	1.57113	348.788	FALSE	TRUE	FALSE
ENSMUSG00000021211	Akr1c12	0	NA	2.66981	178.419	FALSE	TRUE	FALSE
ENSMUSG00000021213	Akr1c13	0	NA	1.84111	117.526	FALSE	TRUE	FALSE
ENSMUSG00000021214	Akr1c18	0	NA	-3.93587	1058.81	FALSE	TRUE	FALSE
ENSMUSG00000021280	Exoc3l4	0	NA	1.33	537.34	FALSE	TRUE	FALSE
ENSMUSG00000021345	Prl8a6	0	NA	7.00638	1075.41	FALSE	TRUE	FALSE
ENSMUSG00000021346	Prl8a8	0	NA	5.86613	534.152	FALSE	TRUE	FALSE
ENSMUSG00000021347	Prl7b1	0	NA	5.55039	1034.52	FALSE	TRUE	FALSE
ENSMUSG00000021348	Prl7d1	0	NA	5.54647	2862.8	FALSE	TRUE	FALSE
ENSMUSG00000021363	Mak	0	NA	1.89675	64.3215	FALSE	TRUE	FALSE
ENSMUSG00000021384	Susd3	0	NA	1.60922	53.8608	FALSE	TRUE	FALSE
ENSMUSG00000021404	Serpinb9c	0	NA	1.81762	398.413	FALSE	TRUE	FALSE
ENSMUSG00000021439	Ctsq	0	NA	3.91953	1758.47	FALSE	TRUE	FALSE
ENSMUSG00000021440	Cts7	0	NA	-2.62078	67.425	FALSE	TRUE	FALSE
ENSMUSG00000021509	Slc25a48	0	NA	2.46097	335.999	FALSE	TRUE	FALSE
ENSMUSG00000021573	Tppp	0	NA	1.82816	101.557	FALSE	TRUE	FALSE
ENSMUSG00000021587	Pcsk1	0	NA	2.57517	124.323	FALSE	TRUE	FALSE
ENSMUSG00000021604	Irx4	0	NA	3.33248	213.851	FALSE	TRUE	FALSE
ENSMUSG00000021684	Pde8b	0	NA	-1.47319	156.337	FALSE	TRUE	FALSE
ENSMUSG00000021708	Rasgrf2	0	NA	2.7758	184.508	FALSE	TRUE	FALSE
ENSMUSG00000021904	Sema3g	0	NA	-1.7684	99.4763	FALSE	TRUE	FALSE
ENSMUSG00000021974	Fgf9	0	NA	1.76749	132.351	FALSE	TRUE	FALSE
ENSMUSG00000022144	Gdnf	0	NA	-2.62693	109.871	FALSE	TRUE	FALSE
ENSMUSG00000022225	Cma1	0	NA	3.52133	182.911	FALSE	TRUE	FALSE
ENSMUSG00000022321	Cdh10	0	NA	-1.85711	182.202	FALSE	TRUE	FALSE
ENSMUSG00000022371	Col14a1	0	NA	1.57331	550.748	FALSE	TRUE	FALSE
ENSMUSG00000022408	Fam83f	0	NA	1.45411	75.7226	FALSE	TRUE	FALSE
ENSMUSG00000022661	Cd200	0	NA	-1.48021	261.546	FALSE	TRUE	FALSE
ENSMUSG00000022824	Muc13	0	NA	4.00361	1830.28	FALSE	TRUE	FALSE
ENSMUSG00000022831	Hcls1	0	NA	1.36232	43.9174	FALSE	TRUE	FALSE
ENSMUSG00000022875	Kng1	0	NA	1.89789	120.028	FALSE	TRUE	FALSE
ENSMUSG00000022886	Prl2a1	0	NA	3.69719	2862.8	FALSE	TRUE	FALSE
ENSMUSG00000022949	Clic6	0	NA	1.68756	456.893	FALSE	TRUE	FALSE
ENSMUSG00000022996	Wnt10b	0	NA	-2.55469	140.213	FALSE	TRUE	FALSE
ENSMUSG00000023046	Igfbp6	0	NA	-1.91131	375.202	FALSE	TRUE	FALSE
ENSMUSG00000023120	Gm853	0	NA	1.74536	120.483	FALSE	TRUE	FALSE
ENSMUSG00000023159	Psg29	0	NA	1.55203	40.188	FALSE	TRUE	FALSE
ENSMUSG00000023185	Ceacam14	0	NA	4.93185	385.636	FALSE	TRUE	FALSE
ENSMUSG00000023959	Clic5	0	NA	1.73457	360.073	FALSE	TRUE	FALSE
ENSMUSG00000024029	Tff3	0	NA	3.91324	228.467	FALSE	TRUE	FALSE
ENSMUSG00000024053	Emilin2	0	NA	-1.56408	344.096	FALSE	TRUE	FALSE
ENSMUSG00000024064	Galnt14	0	NA	-1.94202	123.131	FALSE	TRUE	FALSE
ENSMUSG00000024164	C3	0	NA	2.5542	874.525	FALSE	TRUE	FALSE
ENSMUSG00000024172	St6gal2	0	NA	-1.51709	100.215	FALSE	TRUE	FALSE
ENSMUSG00000024331	Dsc2	0	NA	1.6055	1083.73	FALSE	TRUE	FALSE
ENSMUSG00000024386	Proc	0	NA	2.62849	168.189	FALSE	TRUE	FALSE
ENSMUSG00000024440	Pcdh12	0	NA	3.474	885.217	FALSE	TRUE	FALSE
ENSMUSG00000024485	Slc4a9	0	NA	2.34352	953.651	FALSE	TRUE	FALSE
ENSMUSG00000024500	Ppp2r2b	0	NA	-1.81565	361.323	FALSE	TRUE	FALSE
ENSMUSG00000024503	Spink1	0	NA	4.7025	520.797	FALSE	TRUE	FALSE
ENSMUSG00000024552	Slc14a2	0	NA	-2.19488	153.489	FALSE	TRUE	FALSE
ENSMUSG00000024663	Rab3il1	0	NA	1.35508	288.946	FALSE	TRUE	FALSE
ENSMUSG00000024727	Trpm6	0	NA	1.66246	259.537	FALSE	TRUE	FALSE
ENSMUSG00000024990	Rbp4	0	NA	2.63051	385.499	FALSE	TRUE	FALSE
ENSMUSG00000025017	Pik3ap1	0	NA	1.9622	320.609	FALSE	TRUE	FALSE
ENSMUSG00000025020	Slit1	0	NA	3.95097	510.441	FALSE	TRUE	FALSE
ENSMUSG00000025075	Habp2	0	NA	1.91512	395.511	FALSE	TRUE	FALSE
ENSMUSG00000025105	Bnc1	0	NA	1.64194	259.338	FALSE	TRUE	FALSE
ENSMUSG00000025165	Sectm1a	0	NA	2.13351	84.8263	FALSE	TRUE	FALSE
ENSMUSG00000025279	Dnase1l3	0	NA	2.68315	596.932	FALSE	TRUE	FALSE
ENSMUSG00000025375	Aatk	0	NA	1.36099	64.9329	FALSE	TRUE	FALSE
ENSMUSG00000025497	Cdhr5	0	NA	2.8455	211.598	FALSE	TRUE	FALSE
ENSMUSG00000025582	Nptx1	0	NA	-1.58402	71.4798	FALSE	TRUE	FALSE
ENSMUSG00000025780	Itih5	0	NA	2.06794	613.693	FALSE	TRUE	FALSE
ENSMUSG00000025876	Unc5a	0	NA	1.34155	152.084	FALSE	TRUE	FALSE
ENSMUSG00000026073	Il1r2	0	NA	1.86844	104.823	FALSE	TRUE	FALSE
ENSMUSG00000026090	2010300C02Rik	0	NA	1.47107	92.5022	FALSE	TRUE	FALSE
ENSMUSG00000026180	Cxcr2	0	NA	2.45417	1353.28	FALSE	TRUE	FALSE
ENSMUSG00000026227	2810459M11Rik	0	NA	2.06711	128.632	FALSE	TRUE	FALSE
ENSMUSG00000026241	Nppc	0	NA	-1.39397	61.6407	FALSE	TRUE	FALSE
ENSMUSG00000026295	Spp2	0	NA	4.00814	347.768	FALSE	TRUE	FALSE
ENSMUSG00000026304	Rab17	0	NA	1.56996	49.6864	FALSE	TRUE	FALSE
ENSMUSG00000026347	Tmem163	0	NA	2.04807	131.029	FALSE	TRUE	FALSE
ENSMUSG00000026417	Pigr	0	NA	1.50804	66.2209	FALSE	TRUE	FALSE
ENSMUSG00000026527	Rgs7	0	NA	-2.07596	136.956	FALSE	TRUE	FALSE
ENSMUSG00000026582	Sele	0	NA	2.21346	97.6918	FALSE	TRUE	FALSE
ENSMUSG00000026630	Batf3	0	NA	1.98646	126.754	FALSE	TRUE	FALSE
ENSMUSG00000026676	Ccdc3	0	NA	-1.81271	189.763	FALSE	TRUE	FALSE
ENSMUSG00000026726	Cubn	0	NA	2.2028	320.3	FALSE	TRUE	FALSE
ENSMUSG00000026765	Lypd6b	0	NA	1.38189	55.8111	FALSE	TRUE	FALSE
ENSMUSG00000026971	Itgb6	0	NA	1.34139	281.045	FALSE	TRUE	FALSE
ENSMUSG00000027004	Frzb	0	NA	1.71454	415.503	FALSE	TRUE	FALSE
ENSMUSG00000027015	Cybrd1	0	NA	1.51523	190.718	FALSE	TRUE	FALSE
ENSMUSG00000027016	Zfp385b	0	NA	-1.7032	83.8118	FALSE	TRUE	FALSE
ENSMUSG00000027068	Dhrs9	0	NA	3.00007	1023.3	FALSE	TRUE	FALSE
ENSMUSG00000027186	Elf5	0	NA	-1.81626	132.269	FALSE	TRUE	FALSE
ENSMUSG00000027215	Cd82	0	NA	2.14097	1219.09	FALSE	TRUE	FALSE
ENSMUSG00000027219	Slc28a2	0	NA	1.70126	188.01	FALSE	TRUE	FALSE
ENSMUSG00000027224	Duoxa1	0	NA	-2.18159	255.763	FALSE	TRUE	FALSE
ENSMUSG00000027225	Duoxa2	0	NA	-2.31624	517.481	FALSE	TRUE	FALSE
ENSMUSG00000027444	8030411F24Rik	0	NA	2.68262	109.36	FALSE	TRUE	FALSE
ENSMUSG00000027457	Snph	0	NA	-1.90181	282.811	FALSE	TRUE	FALSE
ENSMUSG00000027524	Edn3	0	NA	1.91063	87.7827	FALSE	TRUE	FALSE
ENSMUSG00000027643	Ghrh	0	NA	6.07987	1138.27	FALSE	TRUE	FALSE
ENSMUSG00000027765	P2ry1	0	NA	-1.65357	124.453	FALSE	TRUE	FALSE
ENSMUSG00000027827	Kcnab1	0	NA	1.36691	120.849	FALSE	TRUE	FALSE
ENSMUSG00000027849	Syt6	0	NA	-2.25418	812.56	FALSE	TRUE	FALSE
ENSMUSG00000027875	Hmgcs2	0	NA	1.93912	88.5213	FALSE	TRUE	FALSE
ENSMUSG00000027895	Kcnc4	0	NA	2.06147	66.5013	FALSE	TRUE	FALSE
ENSMUSG00000027954	Efna1	0	NA	2.67854	1555.93	FALSE	TRUE	FALSE
ENSMUSG00000028020	Glrb	0	NA	-1.81445	555.646	FALSE	TRUE	FALSE
ENSMUSG00000028033	Kcnq5	0	NA	-1.60302	199.823	FALSE	TRUE	FALSE
ENSMUSG00000028036	Ptgfr	0	NA	-4.03471	1625.8	FALSE	TRUE	FALSE
ENSMUSG00000028125	Abca4	0	NA	1.58423	85.0278	FALSE	TRUE	FALSE
ENSMUSG00000028176	Lrrc7	0	NA	-1.53207	67.3684	FALSE	TRUE	FALSE
ENSMUSG00000028226	Mmp16	0	NA	-1.46322	234.225	FALSE	TRUE	FALSE
ENSMUSG00000028255	Clca1	0	NA	2.92384	325.457	FALSE	TRUE	FALSE
ENSMUSG00000028337	Coro2a	0	NA	1.87163	494.215	FALSE	TRUE	FALSE
ENSMUSG00000028351	Brinp1	0	NA	-1.53941	264.521	FALSE	TRUE	FALSE
ENSMUSG00000028356	Ambp	0	NA	3.89432	239.14	FALSE	TRUE	FALSE
ENSMUSG00000028539	Artn	0	NA	-1.62473	102.574	FALSE	TRUE	FALSE
ENSMUSG00000028631	Kcnq4	0	NA	1.35658	49.0224	FALSE	TRUE	FALSE
ENSMUSG00000028655	Mfsd2a	0	NA	1.39283	204.19	FALSE	TRUE	FALSE
ENSMUSG00000028778	Hcrtr1	0	NA	1.79064	120.099	FALSE	TRUE	FALSE
ENSMUSG00000028871	Rspo1	0	NA	1.74132	167.917	FALSE	TRUE	FALSE
ENSMUSG00000028965	Tnfrsf9	0	NA	4.8685	2862.8	FALSE	TRUE	FALSE
ENSMUSG00000029096	Htra3	0	NA	2.20727	674.902	FALSE	TRUE	FALSE
ENSMUSG00000029123	Stk32b	0	NA	2.49211	156.803	FALSE	TRUE	FALSE
ENSMUSG00000029188	Slc34a2	0	NA	3.63175	898.074	FALSE	TRUE	FALSE
ENSMUSG00000029195	Klb	0	NA	2.21341	436.96	FALSE	TRUE	FALSE
ENSMUSG00000029260	Ugt2b34	0	NA	4.52537	1296.2	FALSE	TRUE	FALSE
ENSMUSG00000029272	Sult1e1	0	NA	2.38993	412.389	FALSE	TRUE	FALSE
ENSMUSG00000029369	Afm	0	NA	1.61097	70.8986	FALSE	TRUE	FALSE
ENSMUSG00000029370	Rassf6	0	NA	2.41075	528.17	FALSE	TRUE	FALSE
ENSMUSG00000029553	Tfec	0	NA	1.87542	86.5379	FALSE	TRUE	FALSE
ENSMUSG00000029608	Rph3a	0	NA	1.41674	72.6051	FALSE	TRUE	FALSE
ENSMUSG00000029646	Cdx2	0	NA	2.24385	164.73	FALSE	TRUE	FALSE
ENSMUSG00000029669	Tspan12	0	NA	-1.81042	425.98	FALSE	TRUE	FALSE
ENSMUSG00000029759	Pon3	0	NA	-1.38961	113.341	FALSE	TRUE	FALSE
ENSMUSG00000029875	Ccdc184	0	NA	1.36389	51.8505	FALSE	TRUE	FALSE
ENSMUSG00000029919	Hpgds	0	NA	2.50396	93.7001	FALSE	TRUE	FALSE
ENSMUSG00000030049	Gkn2	0	NA	3.74404	346.018	FALSE	TRUE	FALSE
ENSMUSG00000030050	Gkn1	0	NA	3.92386	577.172	FALSE	TRUE	FALSE
ENSMUSG00000030092	Cntn6	0	NA	-1.54523	111.992	FALSE	TRUE	FALSE
ENSMUSG00000030109	Slc6a12	0	NA	1.59456	296.008	FALSE	TRUE	FALSE
ENSMUSG00000030110	Ret	0	NA	-2.66214	178.132	FALSE	TRUE	FALSE
ENSMUSG00000030214	Plbd1	0	NA	1.97599	230.281	FALSE	TRUE	FALSE
ENSMUSG00000030217	Art4	0	NA	1.51854	149.448	FALSE	TRUE	FALSE
ENSMUSG00000030237	Slco1a4	0	NA	-1.62019	69.2556	FALSE	TRUE	FALSE
ENSMUSG00000030366	Ceacam12	0	NA	4.8012	357.909	FALSE	TRUE	FALSE
ENSMUSG00000030368	Ceacam11	0	NA	4.98994	938.04	FALSE	TRUE	FALSE
ENSMUSG00000030373	Psg28	0	NA	2.98932	136.445	FALSE	TRUE	FALSE
ENSMUSG00000030468	Siglecg	0	NA	-1.97477	648.931	FALSE	TRUE	FALSE
ENSMUSG00000030650	Tmc5	0	NA	4.45941	492.121	FALSE	TRUE	FALSE
ENSMUSG00000030747	Dgat2	0	NA	1.70131	273.268	FALSE	TRUE	FALSE
ENSMUSG00000031125	3830403N18Rik	0	NA	2.32006	130.142	FALSE	TRUE	FALSE
ENSMUSG00000031133	Arhgef6	0	NA	2.42643	2716.93	FALSE	TRUE	FALSE
ENSMUSG00000031137	Fgf13	0	NA	-2.60158	159.464	FALSE	TRUE	FALSE
ENSMUSG00000031179	3830417A13Rik	0	NA	2.46342	1415.49	FALSE	TRUE	FALSE
ENSMUSG00000031202	Rab39b	0	NA	-1.6998	99.1068	FALSE	TRUE	FALSE
ENSMUSG00000031273	Col4a6	0	NA	-2.49366	1572.22	FALSE	TRUE	FALSE
ENSMUSG00000031283	Chrdl1	0	NA	-2.48509	309.32	FALSE	TRUE	FALSE
ENSMUSG00000031284	Pak3	0	NA	-1.75528	429.078	FALSE	TRUE	FALSE
ENSMUSG00000031285	Dcx	0	NA	-2.9007	807.315	FALSE	TRUE	FALSE
ENSMUSG00000031323	Dmrtc1a	0	NA	2.09642	76.4826	FALSE	TRUE	FALSE
ENSMUSG00000031410	Nxf7	0	NA	2.06426	1568.97	FALSE	TRUE	FALSE
ENSMUSG00000031517	Gpm6a	0	NA	3.36765	534.796	FALSE	TRUE	FALSE
ENSMUSG00000031621	Isx	0	NA	1.77691	114.142	FALSE	TRUE	FALSE
ENSMUSG00000031636	Pdlim3	0	NA	1.48085	389.392	FALSE	TRUE	FALSE
ENSMUSG00000031659	Adcy7	0	NA	3.76189	2456.81	FALSE	TRUE	FALSE
ENSMUSG00000031698	Mylk3	0	NA	1.90788	77.6617	FALSE	TRUE	FALSE
ENSMUSG00000031734	Irx3	0	NA	1.88704	431.119	FALSE	TRUE	FALSE
ENSMUSG00000031780	Ccl17	0	NA	1.38136	54.4974	FALSE	TRUE	FALSE
ENSMUSG00000031825	Crispld2	0	NA	-1.44857	209.633	FALSE	TRUE	FALSE
ENSMUSG00000031844	Hsd17b2	0	NA	3.09912	464.51	FALSE	TRUE	FALSE
ENSMUSG00000031870	Pgr	0	NA	-1.87793	845.995	FALSE	TRUE	FALSE
ENSMUSG00000031871	Cdh5	0	NA	3.36602	2759.36	FALSE	TRUE	FALSE
ENSMUSG00000031891	Hsd11b2	0	NA	1.74495	203.129	FALSE	TRUE	FALSE
ENSMUSG00000031963	Bmper	0	NA	-1.35491	103.209	FALSE	TRUE	FALSE
ENSMUSG00000032013	Trim29	0	NA	-1.8282	100.124	FALSE	TRUE	FALSE
ENSMUSG00000032080	Apoa4	0	NA	3.0533	546.749	FALSE	TRUE	FALSE
ENSMUSG00000032083	Apoa1	0	NA	6.04647	2862.8	FALSE	TRUE	FALSE
ENSMUSG00000032087	Dscaml1	0	NA	1.44821	149.253	FALSE	TRUE	FALSE
ENSMUSG00000032226	Gcnt3	0	NA	2.08145	152.942	FALSE	TRUE	FALSE
ENSMUSG00000032356	Rasgrf1	0	NA	2.46856	179.607	FALSE	TRUE	FALSE
ENSMUSG00000032368	Zic1	0	NA	-1.34104	55.4386	FALSE	TRUE	FALSE
ENSMUSG00000032380	Dapk2	0	NA	1.52729	103.746	FALSE	TRUE	FALSE
ENSMUSG00000032452	Clstn2	0	NA	-1.49293	80.1299	FALSE	TRUE	FALSE
ENSMUSG00000032564	Cpne4	0	NA	1.95714	118.046	FALSE	TRUE	FALSE
ENSMUSG00000032625	Thsd7a	0	NA	-2.08944	184.251	FALSE	TRUE	FALSE
ENSMUSG00000032679	Cd59a	0	NA	2.38734	369.817	FALSE	TRUE	FALSE
ENSMUSG00000032744	Heyl	0	NA	1.77792	229.971	FALSE	TRUE	FALSE
ENSMUSG00000032908	Sgpp2	0	NA	1.9035	323.722	FALSE	TRUE	FALSE
ENSMUSG00000032940	Rbm11	0	NA	-1.98959	103.181	FALSE	TRUE	FALSE
ENSMUSG00000033007	Asic4	0	NA	-2.18426	242.904	FALSE	TRUE	FALSE
ENSMUSG00000033063	Cntnap3	0	NA	-2.4909	356.62	FALSE	TRUE	FALSE
ENSMUSG00000033187	BC016579	0	NA	2.00196	136.632	FALSE	TRUE	FALSE
ENSMUSG00000033192	Lpcat2	0	NA	-1.71361	546.547	FALSE	TRUE	FALSE
ENSMUSG00000033538	Casp4	0	NA	1.35725	68.1978	FALSE	TRUE	FALSE
ENSMUSG00000033737	Fndc3c1	0	NA	2.57568	552.408	FALSE	TRUE	FALSE
ENSMUSG00000033831	Fgb	0	NA	5.22381	594.263	FALSE	TRUE	FALSE
ENSMUSG00000033834	Tpbpa	0	NA	6.03492	2350.98	FALSE	TRUE	FALSE
ENSMUSG00000034127	Tspan8	0	NA	2.03403	739.24	FALSE	TRUE	FALSE
ENSMUSG00000034308	Sdr42e1	0	NA	1.4265	144.048	FALSE	TRUE	FALSE
ENSMUSG00000034648	Lrrn1	0	NA	-1.71364	141.922	FALSE	TRUE	FALSE
ENSMUSG00000034738	Nostrin	0	NA	2.28378	555.041	FALSE	TRUE	FALSE
ENSMUSG00000034780	B3galt1	0	NA	-1.86	603.98	FALSE	TRUE	FALSE
ENSMUSG00000034842	Art3	0	NA	1.7732	120.481	FALSE	TRUE	FALSE
ENSMUSG00000034855	Cxcl10	0	NA	1.69075	111.065	FALSE	TRUE	FALSE
ENSMUSG00000034898	Filip1	0	NA	-1.4438	108.871	FALSE	TRUE	FALSE
ENSMUSG00000034997	Htr2a	0	NA	-2.10905	153.428	FALSE	TRUE	FALSE
ENSMUSG00000035085	1700020L24Rik	0	NA	1.56623	93.4329	FALSE	TRUE	FALSE
ENSMUSG00000035104	Eva1a	0	NA	2.18303	545.543	FALSE	TRUE	FALSE
ENSMUSG00000035273	Hpse	0	NA	1.52384	122.436	FALSE	TRUE	FALSE
ENSMUSG00000035349	Mia2	0	NA	1.54704	63.3909	FALSE	TRUE	FALSE
ENSMUSG00000035373	Ccl7	0	NA	-2.53284	324.753	FALSE	TRUE	FALSE
ENSMUSG00000035395	Pet2	0	NA	2.27897	95.2383	FALSE	TRUE	FALSE
ENSMUSG00000035429	Ptprh	0	NA	1.65113	73.0544	FALSE	TRUE	FALSE
ENSMUSG00000035491	Fthl17a	0	NA	3.72517	1631.58	FALSE	TRUE	FALSE
ENSMUSG00000035513	Ntng2	0	NA	-1.57653	86.4352	FALSE	TRUE	FALSE
ENSMUSG00000035566	Pcdh17	0	NA	-4.29763	1224.87	FALSE	TRUE	FALSE
ENSMUSG00000035615	Frmpd1	0	NA	1.71608	506.355	FALSE	TRUE	FALSE
ENSMUSG00000035852	Misp	0	NA	1.87278	330.572	FALSE	TRUE	FALSE
ENSMUSG00000036062	Phf24	0	NA	2.17884	214.393	FALSE	TRUE	FALSE
ENSMUSG00000036109	Mbnl3	0	NA	1.35846	409.881	FALSE	TRUE	FALSE
ENSMUSG00000036412	Arsi	0	NA	2.66322	386.464	FALSE	TRUE	FALSE
ENSMUSG00000036510	Cdh8	0	NA	-1.46574	49.9235	FALSE	TRUE	FALSE
ENSMUSG00000036570	Fxyd1	0	NA	1.70017	136.364	FALSE	TRUE	FALSE
ENSMUSG00000036832	Lpar3	0	NA	1.67695	304.929	FALSE	TRUE	FALSE
ENSMUSG00000036964	Trim17	0	NA	-1.79182	309.084	FALSE	TRUE	FALSE
ENSMUSG00000037014	Sstr4	0	NA	-1.86337	192.073	FALSE	TRUE	FALSE
ENSMUSG00000037025	Foxa2	0	NA	1.8864	633.667	FALSE	TRUE	FALSE
ENSMUSG00000037060	Prkcdbp	0	NA	-1.44987	400.845	FALSE	TRUE	FALSE
ENSMUSG00000037124	Trim58	0	NA	-1.61304	51.6188	FALSE	TRUE	FALSE
ENSMUSG00000037335	Hand1	0	NA	1.438	578.362	FALSE	TRUE	FALSE
ENSMUSG00000037370	Enpp1	0	NA	1.52223	654.136	FALSE	TRUE	FALSE
ENSMUSG00000037406	Htra4	0	NA	-1.84244	75.4303	FALSE	TRUE	FALSE
ENSMUSG00000037469	Papl	0	NA	1.5206	182.996	FALSE	TRUE	FALSE
ENSMUSG00000037624	Kcnk2	0	NA	2.16366	92.4962	FALSE	TRUE	FALSE
ENSMUSG00000037754	Ppp1r16b	0	NA	3.19715	290.047	FALSE	TRUE	FALSE
ENSMUSG00000037962	Fam101a	0	NA	1.36983	67.3595	FALSE	TRUE	FALSE
ENSMUSG00000037994	Slc9b2	0	NA	1.9817	95.7922	FALSE	TRUE	FALSE
ENSMUSG00000038115	Ano2	0	NA	2.17456	77.5172	FALSE	TRUE	FALSE
ENSMUSG00000038224	Serpinf2	0	NA	3.51733	240.47	FALSE	TRUE	FALSE
ENSMUSG00000038253	Hoxa5	0	NA	-1.43098	919.07	FALSE	TRUE	FALSE
ENSMUSG00000038327	Serpinb9f	0	NA	1.87528	751.149	FALSE	TRUE	FALSE
ENSMUSG00000038370	Pcp4l1	0	NA	-1.94938	238.212	FALSE	TRUE	FALSE
ENSMUSG00000038415	Foxq1	0	NA	2.00534	737.731	FALSE	TRUE	FALSE
ENSMUSG00000038530	Rgs4	0	NA	-2.62236	1569.21	FALSE	TRUE	FALSE
ENSMUSG00000038580	Sct	0	NA	3.12351	2384.59	FALSE	TRUE	FALSE
ENSMUSG00000038624	Nepn	0	NA	1.86558	179.327	FALSE	TRUE	FALSE
ENSMUSG00000038721	Hoxb7	0	NA	-1.35286	168.971	FALSE	TRUE	FALSE
ENSMUSG00000038725	Pkhd1l1	0	NA	1.65901	120.088	FALSE	TRUE	FALSE
ENSMUSG00000038751	Ptk6	0	NA	1.46269	56.7308	FALSE	TRUE	FALSE
ENSMUSG00000038891	Prl3b1	0	NA	7.67672	2112.34	FALSE	TRUE	FALSE
ENSMUSG00000039004	Bmp6	0	NA	1.32245	204.331	FALSE	TRUE	FALSE
ENSMUSG00000039114	Nrn1	0	NA	2.27495	220.181	FALSE	TRUE	FALSE
ENSMUSG00000039236	Isg20	0	NA	2.44164	886.408	FALSE	TRUE	FALSE
ENSMUSG00000039385	Cdh6	0	NA	-2.60703	734.389	FALSE	TRUE	FALSE
ENSMUSG00000039546	Ajap1	0	NA	2.89361	222.567	FALSE	TRUE	FALSE
ENSMUSG00000039865	Slc44a3	0	NA	1.95376	469.167	FALSE	TRUE	FALSE
ENSMUSG00000039878	Slc39a5	0	NA	1.49385	67.4191	FALSE	TRUE	FALSE
ENSMUSG00000040065	Pfpl	0	NA	-2.429	57.8237	FALSE	TRUE	FALSE
ENSMUSG00000040164	Kcns1	0	NA	2.05231	263.921	FALSE	TRUE	FALSE
ENSMUSG00000040329	Il7	0	NA	-2.16704	189.582	FALSE	TRUE	FALSE
ENSMUSG00000040380	Cbln3	0	NA	1.32692	75.3923	FALSE	TRUE	FALSE
ENSMUSG00000040413	Timd2	0	NA	2.3873	161.694	FALSE	TRUE	FALSE
ENSMUSG00000040543	Pitpnm3	0	NA	-2.13012	143.607	FALSE	TRUE	FALSE
ENSMUSG00000040569	Slc26a7	0	NA	1.52969	53.6675	FALSE	TRUE	FALSE
ENSMUSG00000040605	Bace2	0	NA	1.74358	318.044	FALSE	TRUE	FALSE
ENSMUSG00000040808	S100g	0	NA	-1.34469	379.133	FALSE	TRUE	FALSE
ENSMUSG00000040856	Dlk1	0	NA	1.40639	679.075	FALSE	TRUE	FALSE
ENSMUSG00000040891	Foxa3	0	NA	1.34279	81.0294	FALSE	TRUE	FALSE
ENSMUSG00000041078	Grid1	0	NA	-1.44248	60.5268	FALSE	TRUE	FALSE
ENSMUSG00000041439	Mfsd6	0	NA	-1.46598	175.402	FALSE	TRUE	FALSE
ENSMUSG00000041608	Entpd3	0	NA	2.76519	760.494	FALSE	TRUE	FALSE
ENSMUSG00000041616	Nppa	0	NA	-3.57398	669.587	FALSE	TRUE	FALSE
ENSMUSG00000041731	Pgm5	0	NA	-2.48012	2304.23	FALSE	TRUE	FALSE
ENSMUSG00000041737	Tmem45b	0	NA	1.91492	97.9828	FALSE	TRUE	FALSE
ENSMUSG00000041842	Fhdc1	0	NA	1.38307	318.176	FALSE	TRUE	FALSE
ENSMUSG00000042115	Klhdc8a	0	NA	-1.62625	100.108	FALSE	TRUE	FALSE
ENSMUSG00000042182	Bend6	0	NA	1.41715	64.9158	FALSE	TRUE	FALSE
ENSMUSG00000042379	Esm1	0	NA	-1.57311	47.166	FALSE	TRUE	FALSE
ENSMUSG00000042501	Cpa6	0	NA	-2.10824	265.877	FALSE	TRUE	FALSE
ENSMUSG00000042784	Muc1	0	NA	2.21736	364.674	FALSE	TRUE	FALSE
ENSMUSG00000042817	Flt3	0	NA	1.36812	84.5432	FALSE	TRUE	FALSE
ENSMUSG00000042985	Upk3b	0	NA	1.84858	869.012	FALSE	TRUE	FALSE
ENSMUSG00000043017	Ptgir	0	NA	1.32371	56.1353	FALSE	TRUE	FALSE
ENSMUSG00000043029	Trpv3	0	NA	2.13431	259.247	FALSE	TRUE	FALSE
ENSMUSG00000043068	Fam89a	0	NA	1.63994	321.619	FALSE	TRUE	FALSE
ENSMUSG00000043219	Hoxa6	0	NA	-1.64991	266.533	FALSE	TRUE	FALSE
ENSMUSG00000043388	Tmem130	0	NA	2.24513	305.868	FALSE	TRUE	FALSE
ENSMUSG00000043498	9330132A10Rik	0	NA	-1.78905	171.128	FALSE	TRUE	FALSE
ENSMUSG00000043501	Lgals2	0	NA	1.82581	176.762	FALSE	TRUE	FALSE
ENSMUSG00000043549	Fam90a1b	0	NA	2.92411	907.123	FALSE	TRUE	FALSE
ENSMUSG00000043592	Unc5cl	0	NA	2.18045	82.8953	FALSE	TRUE	FALSE
ENSMUSG00000043760	Pkhd1	0	NA	1.47193	51.0377	FALSE	TRUE	FALSE
ENSMUSG00000043953	Ccrl2	0	NA	1.85313	149.569	FALSE	TRUE	FALSE
ENSMUSG00000044534	Ackr2	0	NA	4.01539	213.319	FALSE	TRUE	FALSE
ENSMUSG00000045094	Arhgef37	0	NA	2.33607	429.082	FALSE	TRUE	FALSE
ENSMUSG00000045382	Cxcr4	0	NA	2.58221	188.231	FALSE	TRUE	FALSE
ENSMUSG00000045731	Pnoc	0	NA	-1.54295	129.951	FALSE	TRUE	FALSE
ENSMUSG00000045777	Ifitm10	0	NA	-1.52725	166.98	FALSE	TRUE	FALSE
ENSMUSG00000045915	Ccdc42	0	NA	-1.39978	79.1336	FALSE	TRUE	FALSE
ENSMUSG00000045991	Onecut2	0	NA	2.07195	645.475	FALSE	TRUE	FALSE
ENSMUSG00000046169	Adamts6	0	NA	-1.83852	605.418	FALSE	TRUE	FALSE
ENSMUSG00000046318	Ccbe1	0	NA	1.70747	568.591	FALSE	TRUE	FALSE
ENSMUSG00000046413	Irx3os	0	NA	2.25236	161.698	FALSE	TRUE	FALSE
ENSMUSG00000046593	Tmem215	0	NA	1.85629	268	FALSE	TRUE	FALSE
ENSMUSG00000046607	Hrk	0	NA	1.75301	159.972	FALSE	TRUE	FALSE
ENSMUSG00000046807	Lrrc75b	0	NA	1.47375	56.8007	FALSE	TRUE	FALSE
ENSMUSG00000046856	Gpr1	0	NA	2.22456	199.984	FALSE	TRUE	FALSE
ENSMUSG00000046899	Prl7a2	0	NA	6.82058	979.444	FALSE	TRUE	FALSE
ENSMUSG00000046961	Gpr156	0	NA	1.63584	72.593	FALSE	TRUE	FALSE
ENSMUSG00000046971	Pla2g4f	0	NA	4.8354	491.522	FALSE	TRUE	FALSE
ENSMUSG00000047085	Lrrc4b	0	NA	2.84533	197.842	FALSE	TRUE	FALSE
ENSMUSG00000047182	Irs3	0	NA	2.50076	687.32	FALSE	TRUE	FALSE
ENSMUSG00000047330	Kcne4	0	NA	1.44012	47.292	FALSE	TRUE	FALSE
ENSMUSG00000047661	1600012P17Rik	0	NA	5.49404	786.63	FALSE	TRUE	FALSE
ENSMUSG00000047669	Msl3l2	0	NA	-1.41335	117.045	FALSE	TRUE	FALSE
ENSMUSG00000047728	BC025446	0	NA	3.97031	483.906	FALSE	TRUE	FALSE
ENSMUSG00000047842	Diras2	0	NA	2.08823	216.112	FALSE	TRUE	FALSE
ENSMUSG00000048120	Entpd1	0	NA	2.03015	281.051	FALSE	TRUE	FALSE
ENSMUSG00000048387	Osr1	0	NA	-2.32582	381.756	FALSE	TRUE	FALSE
ENSMUSG00000048489	8430408G22Rik	0	NA	2.45257	321.487	FALSE	TRUE	FALSE
ENSMUSG00000048572	Tmem252	0	NA	-2.40051	1428.81	FALSE	TRUE	FALSE
ENSMUSG00000048978	Nrsn1	0	NA	-1.9642	93.6536	FALSE	TRUE	FALSE
ENSMUSG00000049107	Ntf3	0	NA	1.34783	112.817	FALSE	TRUE	FALSE
ENSMUSG00000049112	Oxtr	0	NA	-1.80978	157.33	FALSE	TRUE	FALSE
ENSMUSG00000049191	Rgag4	0	NA	-1.52125	286.778	FALSE	TRUE	FALSE
ENSMUSG00000049265	Kcnk3	0	NA	1.34024	49.8838	FALSE	TRUE	FALSE
ENSMUSG00000049404	Rarres1	0	NA	1.89858	219.108	FALSE	TRUE	FALSE
ENSMUSG00000049436	Upk1b	0	NA	1.48457	382.369	FALSE	TRUE	FALSE
ENSMUSG00000049511	Htr1b	0	NA	-3.60204	330.823	FALSE	TRUE	FALSE
ENSMUSG00000049555	Tmie	0	NA	-1.56487	124.222	FALSE	TRUE	FALSE
ENSMUSG00000049709	Nlrp10	0	NA	1.87847	158.045	FALSE	TRUE	FALSE
ENSMUSG00000049719	Prss46	0	NA	-2.46615	105.972	FALSE	TRUE	FALSE
ENSMUSG00000049892	Rasd1	0	NA	1.45931	171.484	FALSE	TRUE	FALSE
ENSMUSG00000049928	Glp2r	0	NA	-1.55951	98.0672	FALSE	TRUE	FALSE
ENSMUSG00000050022	Amz1	0	NA	2.27103	324.196	FALSE	TRUE	FALSE
ENSMUSG00000050063	Klk6	0	NA	2.2147	145.127	FALSE	TRUE	FALSE
ENSMUSG00000050064	Zfp697	0	NA	-1.5609	562.976	FALSE	TRUE	FALSE
ENSMUSG00000050211	Pla2g4e	0	NA	4.39309	423.693	FALSE	TRUE	FALSE
ENSMUSG00000050234	Gja4	0	NA	2.4939	125.426	FALSE	TRUE	FALSE
ENSMUSG00000050295	Foxc1	0	NA	-1.46602	150.048	FALSE	TRUE	FALSE
ENSMUSG00000050334	C130071C03Rik	0	NA	2.02849	95.38	FALSE	TRUE	FALSE
ENSMUSG00000050345	4930486L24Rik	0	NA	1.74572	82.78	FALSE	TRUE	FALSE
ENSMUSG00000050395	Tnfsf15	0	NA	-2.00924	438.33	FALSE	TRUE	FALSE
ENSMUSG00000050423	Ppp1r3g	0	NA	2.02992	88.6094	FALSE	TRUE	FALSE
ENSMUSG00000050541	Adra1b	0	NA	-1.8198	128.276	FALSE	TRUE	FALSE
ENSMUSG00000050854	Tmem125	0	NA	1.78691	268.442	FALSE	TRUE	FALSE
ENSMUSG00000051076	Vtcn1	0	NA	1.79291	263.273	FALSE	TRUE	FALSE
ENSMUSG00000051279	Gdf6	0	NA	-1.32847	627.883	FALSE	TRUE	FALSE
ENSMUSG00000051951	Xkr4	0	NA	-1.69875	170.192	FALSE	TRUE	FALSE
ENSMUSG00000052005	Gm9864	0	NA	2.22028	95.8871	FALSE	TRUE	FALSE
ENSMUSG00000052085	Dock8	0	NA	1.48564	331.756	FALSE	TRUE	FALSE
ENSMUSG00000052430	Bmpr1b	0	NA	-1.91771	77.1582	FALSE	TRUE	FALSE
ENSMUSG00000052560	Cpne8	0	NA	-1.8171	1253.35	FALSE	TRUE	FALSE
ENSMUSG00000052914	Cyp2j6	0	NA	-1.45199	294.93	FALSE	TRUE	FALSE
ENSMUSG00000053024	Cntn2	0	NA	1.49346	50.6213	FALSE	TRUE	FALSE
ENSMUSG00000053063	Clec12a	0	NA	4.65894	366.222	FALSE	TRUE	FALSE
ENSMUSG00000053093	Myh7	0	NA	2.95845	160.026	FALSE	TRUE	FALSE
ENSMUSG00000053199	Arhgap20	0	NA	-1.7046	106.283	FALSE	TRUE	FALSE
ENSMUSG00000053228	Ceacam3	0	NA	4.65003	511.847	FALSE	TRUE	FALSE
ENSMUSG00000053897	Slc39a8	0	NA	2.03749	724.84	FALSE	TRUE	FALSE
ENSMUSG00000054146	Krt15	0	NA	-1.4818	457.913	FALSE	TRUE	FALSE
ENSMUSG00000054161	Fam83e	0	NA	2.00663	106.652	FALSE	TRUE	FALSE
ENSMUSG00000054252	Fgfr3	0	NA	1.42424	161.771	FALSE	TRUE	FALSE
ENSMUSG00000054258	Gm5082	0	NA	1.87556	101.747	FALSE	TRUE	FALSE
ENSMUSG00000054640	Slc8a1	0	NA	-1.69355	550.591	FALSE	TRUE	FALSE
ENSMUSG00000054728	Phactr1	0	NA	3.73915	1920.86	FALSE	TRUE	FALSE
ENSMUSG00000054932	Afp	0	NA	4.04558	634.269	FALSE	TRUE	FALSE
ENSMUSG00000055298	Ctsj	0	NA	4.74238	2862.8	FALSE	TRUE	FALSE
ENSMUSG00000055312	Them7	0	NA	-1.78722	134.981	FALSE	TRUE	FALSE
ENSMUSG00000055360	Prl2c5	0	NA	3.85299	2834.45	FALSE	TRUE	FALSE
ENSMUSG00000055368	Slc6a2	0	NA	3.38701	1695.07	FALSE	TRUE	FALSE
ENSMUSG00000055413	H2-Q5	0	NA	1.85939	80.94	FALSE	TRUE	FALSE
ENSMUSG00000055639	Dach1	0	NA	-2.0901	138.813	FALSE	TRUE	FALSE
ENSMUSG00000055679	Ctsr	0	NA	4.13666	1424.71	FALSE	TRUE	FALSE
ENSMUSG00000055976	Cldn23	0	NA	1.48473	202.579	FALSE	TRUE	FALSE
ENSMUSG00000056222	Spock1	0	NA	1.47977	196.496	FALSE	TRUE	FALSE
ENSMUSG00000056296	Synpr	0	NA	-2.11311	129.73	FALSE	TRUE	FALSE
ENSMUSG00000056380	Gpr50	0	NA	2.40581	1165.91	FALSE	TRUE	FALSE
ENSMUSG00000056457	Prl2c3	0	NA	1.81842	860.785	FALSE	TRUE	FALSE
ENSMUSG00000056492	Adgrf5	0	NA	2.78278	2862.8	FALSE	TRUE	FALSE
ENSMUSG00000056643	Chst13	0	NA	2.65701	109.087	FALSE	TRUE	FALSE
ENSMUSG00000056648	Hoxb8	0	NA	-1.41154	118.285	FALSE	TRUE	FALSE
ENSMUSG00000057195	Ceacam13	0	NA	4.68871	369.044	FALSE	TRUE	FALSE
ENSMUSG00000057615	Ldoc1	0	NA	2.55496	544.674	FALSE	TRUE	FALSE
ENSMUSG00000057726	Serpinb9g	0	NA	2.21399	1209.49	FALSE	TRUE	FALSE
ENSMUSG00000058153	Sez6l	0	NA	1.90913	76.215	FALSE	TRUE	FALSE
ENSMUSG00000058248	Kcnh1	0	NA	1.98448	108.368	FALSE	TRUE	FALSE
ENSMUSG00000058360	Gm10040	0	NA	2.26996	84.1592	FALSE	TRUE	FALSE
ENSMUSG00000058620	Adra2b	0	NA	2.31183	1235.34	FALSE	TRUE	FALSE
ENSMUSG00000058624	Gda	0	NA	-1.82389	734.773	FALSE	TRUE	FALSE
ENSMUSG00000059334	Zfp36l3	0	NA	2.34069	1566.44	FALSE	TRUE	FALSE
ENSMUSG00000059668	Krt4	0	NA	-2.76472	1404.89	FALSE	TRUE	FALSE
ENSMUSG00000059741	Myl3	0	NA	1.9816	275.002	FALSE	TRUE	FALSE
ENSMUSG00000060470	Adgrg3	0	NA	3.75295	845.065	FALSE	TRUE	FALSE
ENSMUSG00000060550	H2-Q7	0	NA	1.4455	98.8965	FALSE	TRUE	FALSE
ENSMUSG00000060981	Hist1h4h	0	NA	2.10425	105.214	FALSE	TRUE	FALSE
ENSMUSG00000061143	Maml3	0	NA	1.38822	546.22	FALSE	TRUE	FALSE
ENSMUSG00000061451	Tmem151a	0	NA	1.33668	98.2183	FALSE	TRUE	FALSE
ENSMUSG00000061808	Ttr	0	NA	3.96826	783.813	FALSE	TRUE	FALSE
ENSMUSG00000062342	Serpinb9e	0	NA	1.78312	1058.16	FALSE	TRUE	FALSE
ENSMUSG00000062551	Prl2c1	0	NA	2.84152	539.156	FALSE	TRUE	FALSE
ENSMUSG00000062591	Tubb4a	0	NA	1.35385	393.445	FALSE	TRUE	FALSE
ENSMUSG00000062705	Tpbpb	0	NA	6.84143	2330.21	FALSE	TRUE	FALSE
ENSMUSG00000062960	Kdr	0	NA	-1.3684	590.065	FALSE	TRUE	FALSE
ENSMUSG00000063303	#N/A	0	NA	1.60001	79.1963	FALSE	TRUE	FALSE
ENSMUSG00000064016	Gm648	0	NA	2.24344	368.102	FALSE	TRUE	FALSE
ENSMUSG00000064039	Ccr1l1	0	NA	4.17815	517.549	FALSE	TRUE	FALSE
ENSMUSG00000064246	Chil1	0	NA	1.99706	91.9524	FALSE	TRUE	FALSE
ENSMUSG00000064293	Cntn4	0	NA	-2.73875	214.521	FALSE	TRUE	FALSE
ENSMUSG00000066477	Gm16551	0	NA	3.10254	143.084	FALSE	TRUE	FALSE
ENSMUSG00000066687	Zbtb16	0	NA	2.91608	347.835	FALSE	TRUE	FALSE
ENSMUSG00000066760	Psg16	0	NA	3.77287	553.55	FALSE	TRUE	FALSE
ENSMUSG00000067235	H2-Q10	0	NA	1.68434	75.9708	FALSE	TRUE	FALSE
ENSMUSG00000067771	Gm14685	0	NA	1.62803	157.055	FALSE	TRUE	FALSE
ENSMUSG00000068048	Rhox9	0	NA	1.71456	1345.99	FALSE	TRUE	FALSE
ENSMUSG00000068227	Il2rb	0	NA	2.76049	355.668	FALSE	TRUE	FALSE
ENSMUSG00000068452	Duox2	0	NA	-2.76223	1127.45	FALSE	TRUE	FALSE
ENSMUSG00000068587	Mgam	0	NA	-2.50426	289.211	FALSE	TRUE	FALSE
ENSMUSG00000069171	Nr2f1	0	NA	-1.50445	727.825	FALSE	TRUE	FALSE
ENSMUSG00000069258	Prl2b1	0	NA	6.31854	1871.71	FALSE	TRUE	FALSE
ENSMUSG00000069259	Prl6a1	0	NA	2.6716	136.039	FALSE	TRUE	FALSE
ENSMUSG00000070719	Pla2g4d	0	NA	5.46752	528.872	FALSE	TRUE	FALSE
ENSMUSG00000070796	Psg21	0	NA	5.83231	729.811	FALSE	TRUE	FALSE
ENSMUSG00000070797	Psg27	0	NA	5.95104	854.425	FALSE	TRUE	FALSE
ENSMUSG00000070798	Psg25	0	NA	2.85871	150.308	FALSE	TRUE	FALSE
ENSMUSG00000070867	Trabd2b	0	NA	-1.37745	484.085	FALSE	TRUE	FALSE
ENSMUSG00000071001	Hrct1	0	NA	2.21535	183.682	FALSE	TRUE	FALSE
ENSMUSG00000071042	Rasgrp3	0	NA	-1.61829	423.024	FALSE	TRUE	FALSE
ENSMUSG00000071317	Bves	0	NA	-1.8886	130.253	FALSE	TRUE	FALSE
ENSMUSG00000071452	Gm11397	0	NA	1.94375	590.211	FALSE	TRUE	FALSE
ENSMUSG00000071506	Tmem139	0	NA	1.45281	72.9557	FALSE	TRUE	FALSE
ENSMUSG00000071745	DXBay18	0	NA	1.83722	187.037	FALSE	TRUE	FALSE
ENSMUSG00000071757	Zhx2	0	NA	-1.82633	635.816	FALSE	TRUE	FALSE
ENSMUSG00000072572	Slc39a2	0	NA	1.40382	100.082	FALSE	TRUE	FALSE
ENSMUSG00000073012	Fnd3c2	0	NA	2.99594	2086.49	FALSE	TRUE	FALSE
ENSMUSG00000073027	Dmrtc1b	0	NA	3.57219	226.672	FALSE	TRUE	FALSE
ENSMUSG00000073130	Gm1141	0	NA	2.25765	320.101	FALSE	TRUE	FALSE
ENSMUSG00000073514	Dok6	0	NA	-1.49101	50.883	FALSE	TRUE	FALSE
ENSMUSG00000073530	Pappa2	0	NA	4.69131	2862.8	FALSE	TRUE	FALSE
ENSMUSG00000073731	AI507597	0	NA	1.50713	54.8999	FALSE	TRUE	FALSE
ENSMUSG00000073795	6430531B16Rik	0	NA	1.76121	121.164	FALSE	TRUE	FALSE
ENSMUSG00000074359	Psg23	0	NA	5.50156	556.39	FALSE	TRUE	FALSE
ENSMUSG00000074361	C5ar2	0	NA	4.27117	292.355	FALSE	TRUE	FALSE
ENSMUSG00000074373	Gm10680	0	NA	3.02596	304.975	FALSE	TRUE	FALSE
ENSMUSG00000074418	Gm15930	0	NA	4.05394	380.828	FALSE	TRUE	FALSE
ENSMUSG00000074420	Gm10693	0	NA	4.16364	310.28	FALSE	TRUE	FALSE
ENSMUSG00000074505	Fat3	0	NA	-2.12937	1289.9	FALSE	TRUE	FALSE
ENSMUSG00000074788	#N/A	0	NA	1.97977	236.798	FALSE	TRUE	FALSE
ENSMUSG00000074870	Cts3	0	NA	4.28497	212.499	FALSE	TRUE	FALSE
ENSMUSG00000074874	Ctla2b	0	NA	2.61967	334.722	FALSE	TRUE	FALSE
ENSMUSG00000074923	Pak6	0	NA	1.98443	372.557	FALSE	TRUE	FALSE
ENSMUSG00000075224	Lrrc55	0	NA	-1.51087	75.3021	FALSE	TRUE	FALSE
ENSMUSG00000075225	Ccdc162	0	NA	1.33454	49.4541	FALSE	TRUE	FALSE
ENSMUSG00000075296	Aldh3b2	0	NA	2.2952	208.941	FALSE	TRUE	FALSE
ENSMUSG00000075463	4930594M22Rik	0	NA	-1.50659	177.843	FALSE	TRUE	FALSE
ENSMUSG00000075588	Hoxb2	0	NA	-1.43944	470.631	FALSE	TRUE	FALSE
ENSMUSG00000075604	Cyp11b1	0	NA	-2.00855	410.236	FALSE	TRUE	FALSE
ENSMUSG00000076928	Trac	0	NA	-1.80253	387.41	FALSE	TRUE	FALSE
ENSMUSG00000078117	Gm16485	0	NA	-1.99639	457.416	FALSE	TRUE	FALSE
ENSMUSG00000078793	Gm5155	0	NA	3.74293	169.813	FALSE	TRUE	FALSE
ENSMUSG00000078851	Hist3h2a	0	NA	-2.03601	536.099	FALSE	TRUE	FALSE
ENSMUSG00000078921	Tgtp2	0	NA	-1.53739	454.522	FALSE	TRUE	FALSE
ENSMUSG00000078922	Tgtp1	0	NA	-1.5477	390.685	FALSE	TRUE	FALSE
ENSMUSG00000079017	Ifi27l2a	0	NA	1.48145	292.055	FALSE	TRUE	FALSE
ENSMUSG00000079021	#N/A	0	NA	1.56403	139.881	FALSE	TRUE	FALSE
ENSMUSG00000079049	Serpinb1c	0	NA	2.55104	132.666	FALSE	TRUE	FALSE
ENSMUSG00000079071	Gm14085	0	NA	1.95404	93.7055	FALSE	TRUE	FALSE
ENSMUSG00000079092	Prl2c2	0	NA	1.79601	775.316	FALSE	TRUE	FALSE
ENSMUSG00000079103	Tgm7	0	NA	-3.06773	595.413	FALSE	TRUE	FALSE
ENSMUSG00000079227	Ccr5	0	NA	-2.86784	405.616	FALSE	TRUE	FALSE
ENSMUSG00000079479	Gm9112	0	NA	3.93825	259.307	FALSE	TRUE	FALSE
ENSMUSG00000079492	Gm11127	0	NA	1.72221	79.516	FALSE	TRUE	FALSE
ENSMUSG00000079499	6530402F18Rik	0	NA	-1.70234	111.888	FALSE	TRUE	FALSE
ENSMUSG00000079507	H2-Q1	0	NA	1.40913	57.7677	FALSE	TRUE	FALSE
ENSMUSG00000079531	Gm5936	0	NA	1.69387	55.0652	FALSE	TRUE	FALSE
ENSMUSG00000079534	Gm5640	0	NA	1.69207	56.7311	FALSE	TRUE	FALSE
ENSMUSG00000081237	Gm11385	0	NA	1.51763	56.4044	FALSE	TRUE	FALSE
ENSMUSG00000081778	Gm6325	0	NA	3.3178	2186.4	FALSE	TRUE	FALSE
ENSMUSG00000082618	Gm14852	0	NA	2.73186	138.296	FALSE	TRUE	FALSE
ENSMUSG00000082629	Gm5639	0	NA	1.35718	70.682	FALSE	TRUE	FALSE
ENSMUSG00000082674	Gm11914	0	NA	1.78166	126.164	FALSE	TRUE	FALSE
ENSMUSG00000083814	Gm5133	0	NA	2.28574	353.388	FALSE	TRUE	FALSE
ENSMUSG00000084308	Gm14593	0	NA	2.1681	248.352	FALSE	TRUE	FALSE
ENSMUSG00000084803	5830444B04Rik	0	NA	-1.69713	177.311	FALSE	TRUE	FALSE
ENSMUSG00000084843	B230312C02Rik	0	NA	3.50082	249.307	FALSE	TRUE	FALSE
ENSMUSG00000085114	1600025M17Rik	0	NA	2.20784	416.656	FALSE	TRUE	FALSE
ENSMUSG00000085139	A730046J19Rik	0	NA	2.47304	153.425	FALSE	TRUE	FALSE
ENSMUSG00000085832	#N/A	0	NA	-3.20015	227.835	FALSE	TRUE	FALSE
ENSMUSG00000085957	Syna	0	NA	2.06055	310.997	FALSE	TRUE	FALSE
ENSMUSG00000085990	Gm16731	0	NA	1.5036	70.1491	FALSE	TRUE	FALSE
ENSMUSG00000086141	9030622O22Rik	0	NA	1.68363	76.5098	FALSE	TRUE	FALSE
ENSMUSG00000086255	Gm11534	0	NA	1.86292	136.312	FALSE	TRUE	FALSE
ENSMUSG00000086358	Gm13270	0	NA	1.96415	149.572	FALSE	TRUE	FALSE
ENSMUSG00000086391	1700042O10Rik	0	NA	-2.36042	129.32	FALSE	TRUE	FALSE
ENSMUSG00000086549	Gm13648	0	NA	1.81023	76.2277	FALSE	TRUE	FALSE
ENSMUSG00000086742	Gm16201	0	NA	2.01144	210.842	FALSE	TRUE	FALSE
ENSMUSG00000086806	Gm13054	0	NA	-3.42127	535.544	FALSE	TRUE	FALSE
ENSMUSG00000086878	#N/A	0	NA	1.99226	87.4266	FALSE	TRUE	FALSE
ENSMUSG00000086982	#N/A	0	NA	-1.42743	97.6102	FALSE	TRUE	FALSE
ENSMUSG00000087143	A830082K12Rik	0	NA	-1.34124	149.572	FALSE	TRUE	FALSE
ENSMUSG00000087583	#N/A	0	NA	-1.75105	144.075	FALSE	TRUE	FALSE
ENSMUSG00000087623	Gm12404	0	NA	1.54016	73.9486	FALSE	TRUE	FALSE
ENSMUSG00000089635	Gm16559	0	NA	-1.68883	73.2037	FALSE	TRUE	FALSE
ENSMUSG00000089922	3110039M20Rik	0	NA	-2.22821	94.4814	FALSE	TRUE	FALSE
ENSMUSG00000090316	#N/A	0	NA	2.59863	113.244	FALSE	TRUE	FALSE
ENSMUSG00000090425	#N/A	0	NA	-1.68227	406.85	FALSE	TRUE	FALSE
ENSMUSG00000090442	#N/A	0	NA	4.4897	255.392	FALSE	TRUE	FALSE
ENSMUSG00000090847	#N/A	0	NA	2.77857	110.615	FALSE	TRUE	FALSE
ENSMUSG00000090863	A530084C06Rik	0	NA	1.92133	512.907	FALSE	TRUE	FALSE
ENSMUSG00000090962	#N/A	0	NA	2.52608	123.384	FALSE	TRUE	FALSE
ENSMUSG00000091412	Gm2895	0	NA	1.38631	42.374	FALSE	TRUE	FALSE
ENSMUSG00000091439	#N/A	0	NA	2.12026	123.243	FALSE	TRUE	FALSE
ENSMUSG00000091626	#N/A	0	NA	2.40976	86.1537	FALSE	TRUE	FALSE
ENSMUSG00000091663	#N/A	0	NA	2.59307	127.082	FALSE	TRUE	FALSE
ENSMUSG00000091705	H2-Q2	0	NA	1.80814	101.348	FALSE	TRUE	FALSE
ENSMUSG00000091746	#N/A	0	NA	2.69076	109.115	FALSE	TRUE	FALSE
ENSMUSG00000092215	#N/A	0	NA	-1.35908	63.4771	FALSE	TRUE	FALSE
