# Supplementary material for: Enforcement of developmental lineage specificity by transcription factor Oct1
Source: eLife. 2017 May 24;6:e20937. doi: 10.7554/eLife.20937 (PMC5466424; doi:10.7554/eLife.20937)
Supplement: Supplementary file 2. — DOI: http://dx.doi.org/10.7554/eLife.20937.032 [file elife-20937-supp2.xlsx]

## Sheet: Sheet1
Shen et al Supplementary file 2-Table 2: Genes identified by ChIPseq in comparison to RNAseq data
Unique Oct1	N=193
ENSMUSG00000032392	ENSMUSG00000097574	ENSMUSG00000082101	ENSMUSG00000034936	ENSMUSG00000013858	ENSMUSG00000037375	ENSMUSG00000028661
ENSMUSG00000010342	ENSMUSG00000020895	ENSMUSG00000022389	ENSMUSG00000031577	ENSMUSG00000022519	ENSMUSG00000041911	ENSMUSG00000021809
ENSMUSG00000028461	ENSMUSG00000038990	ENSMUSG00000030731	ENSMUSG00000079020	ENSMUSG00000016481	ENSMUSG00000023055	ENSMUSG00000018102
ENSMUSG00000030411	ENSMUSG00000015890	ENSMUSG00000035547	ENSMUSG00000069744	ENSMUSG00000040652	ENSMUSG00000034472	ENSMUSG00000022365
ENSMUSG00000023008	ENSMUSG00000063160	ENSMUSG00000061615	ENSMUSG00000010045	ENSMUSG00000015488	ENSMUSG00000034422	ENSMUSG00000044700
ENSMUSG00000032297	ENSMUSG00000020325	ENSMUSG00000002980	ENSMUSG00000017716	ENSMUSG00000032026	ENSMUSG00000008036	ENSMUSG00000020937
ENSMUSG00000053702	ENSMUSG00000003273	ENSMUSG00000025648	ENSMUSG00000034341	ENSMUSG00000018585	ENSMUSG00000042770	ENSMUSG00000050075
ENSMUSG00000054715	ENSMUSG00000087621	ENSMUSG00000060257	ENSMUSG00000021975	ENSMUSG00000053477	ENSMUSG00000014303	ENSMUSG00000063849
ENSMUSG00000038811	ENSMUSG00000027230	ENSMUSG00000032724	ENSMUSG00000035967	ENSMUSG00000061911	ENSMUSG00000037366	ENSMUSG00000070000
ENSMUSG00000059743	ENSMUSG00000075031	ENSMUSG00000026433	ENSMUSG00000020886	ENSMUSG00000087651	ENSMUSG00000048686	ENSMUSG00000022956
ENSMUSG00000055866	ENSMUSG00000017721	miRBase:MI0000695	ENSMUSG00000024043	ENSMUSG00000052783	ENSMUSG00000009291	ENSMUSG00000046070
ENSMUSG00000097616	ENSMUSG00000093452	ENSMUSG00000056938	ENSMUSG00000036422	ENSMUSG00000059970	ENSMUSG00000024800	ENSMUSG00000008450
ENSMUSG00000031309	ENSMUSG00000029829	ENSMUSG00000028974	ENSMUSG00000097277	ENSMUSG00000012819	ENSMUSG00000022568	miRBase:MI0000550
ENSMUSG00000028785	ENSMUSG00000020600	ENSMUSG00000018470	ENSMUSG00000034563	ENSMUSG00000000374	ENSMUSG00000038845	ENSMUSG00000036957
ENSMUSG00000030699	ENSMUSG00000015599	ENSMUSG00000046487	ENSMUSG00000003072	ENSMUSG00000028969	ENSMUSG00000042870	ENSMUSG00000020321
ENSMUSG00000042628	ENSMUSG00000017897	ENSMUSG00000023467	ENSMUSG00000029605	ENSMUSG00000084826	ENSMUSG00000020528	ENSMUSG00000042812
ENSMUSG00000039934	ENSMUSG00000075553	ENSMUSG00000058385	ENSMUSG00000030605	ENSMUSG00000009076	ENSMUSG00000026028	ENSMUSG00000038332
ENSMUSG00000032381	ENSMUSG00000032040	ENSMUSG00000056515	ENSMUSG00000017737	ENSMUSG00000029595	ENSMUSG00000024516	ENSMUSG00000078600
ENSMUSG00000031575	ENSMUSG00000022841	ENSMUSG00000031098	ENSMUSG00000083674	ENSMUSG00000061533	ENSMUSG00000021898	ENSMUSG00000039158
ENSMUSG00000015217	ENSMUSG00000041592	ENSMUSG00000024793	ENSMUSG00000043639	ENSMUSG00000055197	ENSMUSG00000032446	ENSMUSG00000005045
ENSMUSG00000002266	ENSMUSG00000022570	ENSMUSG00000069763	ENSMUSG00000037851	ENSMUSG00000040694	ENSMUSG00000028973	ENSMUSG00000004894
ENSMUSG00000032502	ENSMUSG00000018008	ENSMUSG00000025427	ENSMUSG00000050138	ENSMUSG00000020577	ENSMUSG00000062044	ENSMUSG00000038453
ENSMUSG00000044950	ENSMUSG00000046093	ENSMUSG00000027499	ENSMUSG00000021506	ENSMUSG00000091764	ENSMUSG00000096607	ENSMUSG00000085918
ENSMUSG00000020333	ENSMUSG00000053198	ENSMUSG00000092369	ENSMUSG00000043668	ENSMUSG00000028736	ENSMUSG00000039043	ENSMUSG00000044749
ENSMUSG00000049858	ENSMUSG00000038888	ENSMUSG00000001829	ENSMUSG00000039285	ENSMUSG00000040466	ENSMUSG00000070814	ENSMUSG00000028062
ENSMUSG00000094500	ENSMUSG00000044636	ENSMUSG00000042677	ENSMUSG00000049744	ENSMUSG00000024479	ENSMUSG00000060012	ENSMUSG00000044313
ENSMUSG00000031955	ENSMUSG00000030748	ENSMUSG00000047034	ENSMUSG00000029534	ENSMUSG00000031840	ENSMUSG00000018574	ENSMUSG00000028524
ENSMUSG00000017119	ENSMUSG00000058488	ENSMUSG00000028565	ENSMUSG00000046585
PARP16	C920006O11RIK	SLFN14	ARL4D	TMEM259	HHAT	EPHA8	TEX14	TMEM107	TEF	TTI2	SRL	DLX1	NUDT13	CCDC107	CABLES2	SYT3	SLC45A4	CR1L	CALCOCO1
HIST1H2BC	NOVA2	AMDHD1	CAPN5	PSMB3	OAZ2	RASD2	DERL1	FMNL3	NUMBL	HIST1H2AB	TMEM115	CACFD1	PARP14	TMEM201	CELF6	FSTL3	BCAM	BIRC5	REXO2
AP2S1	PLCD3	NEBL	CAR11	PFKFB4	WBP2	ATOX1	HEBP1	GPR171	ZSCAN22	1700003G18RIK	SCRT2	INTS9	TCF4	GLIS2	PPCDC	GNGT2	CREB3L1	ABTB2	DDX26B
MYT1L	PAFAH2	FCHO1	FDPS	HIST1H2BB	RAB29	DLG4	1500009L16RIK	HMGB4	ATP5O	PER2	PIGT	MIR210	ARHGAP28	GRK4	PTTG1IP	IGFALS	1110019D14RIK	ZFHX2OS	ACBD4
PCDH8	HSPA2	RPP30	NUTF2	RPS6KA3	TMEM213	DFFA	2900076A07RIK	CDH23	SCRIB	MIR148A	HPCA	SLC7A15	KCNAB3	CCPG1	TRAPPC10	PHB	LRFN3	TBX6	TTBK1
MOSPD4	ATP5D	CDK5	TOM1	MDH1	ZFYVE1	EYA2	TULP2	OAS1B	AI847159	PRPSAP2	FOXF1	GSAP	GM5464	HIST1H2BG	MFGE8	ZMAT5	TRAK2	SESN1	FAM96A
DCPS	RAB31	MMP9	LHX5	SEC11C	1700092K14RIK	ASH2L	AP2M1	SYT8	ZFP133-PS	CEP128	ASB14	AKNA	HMGB3	SDK2	TNFRSF25	RBM20	FEV	EOMES	CHD5
ZIM1	TSTA3	TMEM100	IARS	APOBEC2	ABCB8	HAPLN2	STAC	CYTH4	RNF165	KCNK12	TSPAN13	LMTK3	SRCIN1	PWWP2A	HPCAL4	PKIA	PITX1	ZFP964	7530416G11RIK
GM13032	ACSL6	PRX	1700039E22RIK	TOX3	PAX7	2610034B18RIK	ABCA6	SUOX	CTU1	CLPB	AZI2	BLVRB	6330408A02RIK	LAMTOR2	SMIM18	CSRNP2	ZC3H12A	ARHGAP15	MAL2
KIF13B	MAB21L3	BCAR1	IL4RA	ANKRD33	ST7	RAB3A	ACADVL	SGIP1	NBR1	KL	NFIA	CFAP58
Unique Oct4	N=5343
ENSMUSG00000036202	ENSMUSG00000024406	ENSMUSG00000097624	ENSMUSG00000024259	ENSMUSG00000017453	ENSMUSG00000041530	ENSMUSG00000097756
ENSMUSG00000078202	ENSMUSG00000074637	ENSMUSG00000044681	ENSMUSG00000027551	ENSMUSG00000022762	miRBase:MI0026042	ENSMUSG00000045751
ENSMUSG00000038732	ENSMUSG00000039126	ENSMUSG00000021541	ENSMUSG00000021127	miRBase:MI0021918	ENSMUSG00000014773	ENSMUSG00000062651
ENSMUSG00000056600	ENSMUSG00000047213	ENSMUSG00000027660	ENSMUSG00000020166	ENSMUSG00000074165	ENSMUSG00000028093	ENSMUSG00000026494
ENSMUSG00000040624	ENSMUSG00000058589	ENSMUSG00000048206	ENSMUSG00000078658	ENSMUSG00000059114	ENSMUSG00000041238	ENSMUSG00000038641
ENSMUSG00000029249	ENSMUSG00000008489	ENSMUSG00000038518	ENSMUSG00000061080	ENSMUSG00000034310	ENSMUSG00000033837	ENSMUSG00000021852
ENSMUSG00000021806	ENSMUSG00000033943	ENSMUSG00000070643	ENSMUSG00000000782	ENSMUSG00000041272	ENSMUSG00000035551	ENSMUSG00000027164
ENSMUSG00000026464	ENSMUSG00000055874	ENSMUSG00000015002	ENSMUSG00000045667	ENSMUSG00000024491	ENSMUSG00000029267	ENSMUSG00000087434
ENSMUSG00000035403	ENSMUSG00000036087	ENSMUSG00000054594	ENSMUSG00000028601	ENSMUSG00000086202	ENSMUSG00000035946	ENSMUSG00000066652
ENSMUSG00000026828	ENSMUSG00000029522	ENSMUSG00000024921	ENSMUSG00000024645	ENSMUSG00000041674	ENSMUSG00000030417	ENSMUSG00000034460
ENSMUSG00000037492	ENSMUSG00000079598	ENSMUSG00000070047	ENSMUSG00000050010	ENSMUSG00000000708	ENSMUSG00000022012	ENSMUSG00000068739
ENSMUSG00000026421	ENSMUSG00000044288	ENSMUSG00000014907	ENSMUSG00000020680	ENSMUSG00000038718	ENSMUSG00000041444	ENSMUSG00000021900
ENSMUSG00000029235	ENSMUSG00000039159	ENSMUSG00000007411	ENSMUSG00000024008	ENSMUSG00000021180	ENSMUSG00000051860	ENSMUSG00000022629
ENSMUSG00000078908	ENSMUSG00000031700	ENSMUSG00000000435	ENSMUSG00000069020	ENSMUSG00000089645	ENSMUSG00000054604	ENSMUSG00000033285
ENSMUSG00000097216	ENSMUSG00000046178	ENSMUSG00000059343	ENSMUSG00000017485	ENSMUSG00000074166	ENSMUSG00000037393	ENSMUSG00000020689
ENSMUSG00000047407	ENSMUSG00000031772	ENSMUSG00000028199	ENSMUSG00000052105	ENSMUSG00000039852	ENSMUSG00000024558	miRBase:MI0000229
ENSMUSG00000085496	ENSMUSG00000022883	ENSMUSG00000044499	ENSMUSG00000043535	ENSMUSG00000037815	ENSMUSG00000034163	ENSMUSG00000037339
ENSMUSG00000028373	ENSMUSG00000017692	ENSMUSG00000027200	ENSMUSG00000036295	miRBase:MI0005521	ENSMUSG00000021466	ENSMUSG00000024420
ENSMUSG00000039239	ENSMUSG00000027690	ENSMUSG00000029570	ENSMUSG00000041769	ENSMUSG00000050017	ENSMUSG00000010461	ENSMUSG00000022635
ENSMUSG00000060568	ENSMUSG00000030825	ENSMUSG00000052833	ENSMUSG00000032280	ENSMUSG00000047751	ENSMUSG00000002064	ENSMUSG00000029217
ENSMUSG00000054720	ENSMUSG00000086136	ENSMUSG00000054027	ENSMUSG00000027560	ENSMUSG00000037013	ENSMUSG00000031608	ENSMUSG00000030254
ENSMUSG00000021209	ENSMUSG00000075327	ENSMUSG00000031129	ENSMUSG00000049577	ENSMUSG00000034403	ENSMUSG00000041426	ENSMUSG00000070526
ENSMUSG00000074480	ENSMUSG00000050272	ENSMUSG00000036473	ENSMUSG00000044167	ENSMUSG00000032698	ENSMUSG00000033628	ENSMUSG00000064125
ENSMUSG00000091685	ENSMUSG00000021453	ENSMUSG00000029167	ENSMUSG00000059974	ENSMUSG00000021614	miRBase:MI0005517	ENSMUSG00000046500
ENSMUSG00000097651	ENSMUSG00000000085	ENSMUSG00000097712	ENSMUSG00000027381	ENSMUSG00000039221	ENSMUSG00000051497	ENSMUSG00000060969
ENSMUSG00000047694	ENSMUSG00000019873	ENSMUSG00000019970	ENSMUSG00000024795	ENSMUSG00000033863	ENSMUSG00000071550	ENSMUSG00000050730
ENSMUSG00000031327	ENSMUSG00000056880	ENSMUSG00000030516	ENSMUSG00000048264	ENSMUSG00000055138	ENSMUSG00000002733	ENSMUSG00000028098
ENSMUSG00000019997	ENSMUSG00000004872	ENSMUSG00000031958	ENSMUSG00000030759	ENSMUSG00000034832	ENSMUSG00000049600	ENSMUSG00000057455
ENSMUSG00000022053	ENSMUSG00000002847	ENSMUSG00000086155	ENSMUSG00000026923	ENSMUSG00000037346	ENSMUSG00000056313	ENSMUSG00000018509
ENSMUSG00000073155	ENSMUSG00000044086	ENSMUSG00000027673	ENSMUSG00000021423	ENSMUSG00000002017	ENSMUSG00000022009	ENSMUSG00000002997
ENSMUSG00000019809	ENSMUSG00000030016	ENSMUSG00000050830	ENSMUSG00000038010	ENSMUSG00000021196	ENSMUSG00000026443	ENSMUSG00000051149
ENSMUSG00000043230	ENSMUSG00000029255	ENSMUSG00000050953	ENSMUSG00000036306	ENSMUSG00000038555	ENSMUSG00000033207	ENSMUSG00000026063
ENSMUSG00000073894	ENSMUSG00000085582	ENSMUSG00000036893	ENSMUSG00000000078	ENSMUSG00000006586	ENSMUSG00000019880	ENSMUSG00000039087
ENSMUSG00000045216	ENSMUSG00000044903	ENSMUSG00000022887	ENSMUSG00000068105	ENSMUSG00000049764	ENSMUSG00000018379	ENSMUSG00000025225
ENSMUSG00000052512	ENSMUSG00000022765	ENSMUSG00000018378	ENSMUSG00000040969	ENSMUSG00000019889	ENSMUSG00000038702	ENSMUSG00000000127
ENSMUSG00000051177	ENSMUSG00000044408	ENSMUSG00000039630	ENSMUSG00000030170	ENSMUSG00000043531	ENSMUSG00000032485	ENSMUSG00000069118
ENSMUSG00000025927	ENSMUSG00000023902	ENSMUSG00000028229	ENSMUSG00000022607	ENSMUSG00000072591	ENSMUSG00000008305	ENSMUSG00000070287
ENSMUSG00000044340	ENSMUSG00000034621	ENSMUSG00000020673	ENSMUSG00000064052	ENSMUSG00000033713	ENSMUSG00000020923	ENSMUSG00000017548
ENSMUSG00000027122	ENSMUSG00000049800	ENSMUSG00000034330	ENSMUSG00000050323	ENSMUSG00000025812	ENSMUSG00000091260	ENSMUSG00000021536
ENSMUSG00000024900	ENSMUSG00000050846	miRBase:MI0023719	ENSMUSG00000028813	ENSMUSG00000089672	miRBase:MI0014035	ENSMUSG00000028519
ENSMUSG00000020228	ENSMUSG00000086823	ENSMUSG00000036352	ENSMUSG00000046707	ENSMUSG00000025417	ENSMUSG00000038102	ENSMUSG00000000628
ENSMUSG00000062981	ENSMUSG00000022015	ENSMUSG00000028573	ENSMUSG00000020647	ENSMUSG00000048612	ENSMUSG00000000632	ENSMUSG00000058690
ENSMUSG00000066037	ENSMUSG00000005892	ENSMUSG00000004151	ENSMUSG00000032965	ENSMUSG00000060882	ENSMUSG00000036800	ENSMUSG00000000197
ENSMUSG00000037843	ENSMUSG00000026107	ENSMUSG00000032500	ENSMUSG00000022099	ENSMUSG00000027624	ENSMUSG00000040594	ENSMUSG00000038612
ENSMUSG00000004929	ENSMUSG00000054766	ENSMUSG00000028289	ENSMUSG00000040254	ENSMUSG00000038246	ENSMUSG00000055799	ENSMUSG00000068428
ENSMUSG00000030104	ENSMUSG00000012396	ENSMUSG00000028583	ENSMUSG00000027790	ENSMUSG00000003477	ENSMUSG00000004031	ENSMUSG00000025025
ENSMUSG00000000631	ENSMUSG00000071084	ENSMUSG00000019927	ENSMUSG00000039298	ENSMUSG00000041840	ENSMUSG00000023921	ENSMUSG00000016386
ENSMUSG00000097058	ENSMUSG00000024731	ENSMUSG00000020270	ENSMUSG00000021102	ENSMUSG00000030351	ENSMUSG00000030199	ENSMUSG00000026116
ENSMUSG00000092066	ENSMUSG00000003032	ENSMUSG00000086244	ENSMUSG00000001288	ENSMUSG00000053765	ENSMUSG00000032671	ENSMUSG00000040151
ENSMUSG00000028849	ENSMUSG00000052726	ENSMUSG00000024254	ENSMUSG00000037661	ENSMUSG00000052133	ENSMUSG00000020607	ENSMUSG00000035780
ENSMUSG00000030772	ENSMUSG00000038696	ENSMUSG00000032776	ENSMUSG00000089815	ENSMUSG00000002489	ENSMUSG00000020402	ENSMUSG00000021959
ENSMUSG00000026650	ENSMUSG00000022056	ENSMUSG00000056617	ENSMUSG00000031583	ENSMUSG00000054423	ENSMUSG00000037742	miRBase:MI0000394
ENSMUSG00000019865	ENSMUSG00000040485	ENSMUSG00000021094	ENSMUSG00000005338	ENSMUSG00000041355	ENSMUSG00000097766	ENSMUSG00000028479
ENSMUSG00000022263	ENSMUSG00000042460	ENSMUSG00000018973	ENSMUSG00000015501	ENSMUSG00000021301	miRBase:MI0021902	ENSMUSG00000055489
ENSMUSG00000037331	ENSMUSG00000046982	ENSMUSG00000043391	ENSMUSG00000016128	ENSMUSG00000072568	ENSMUSG00000039046	ENSMUSG00000021606
ENSMUSG00000019986	ENSMUSG00000032411	ENSMUSG00000035704	ENSMUSG00000038174	ENSMUSG00000038587	ENSMUSG00000057228	ENSMUSG00000054641
ENSMUSG00000042272	ENSMUSG00000087107	ENSMUSG00000074749	ENSMUSG00000038539	ENSMUSG00000070315	ENSMUSG00000038346	ENSMUSG00000025991
ENSMUSG00000042548	ENSMUSG00000017858	ENSMUSG00000022387	ENSMUSG00000071454	ENSMUSG00000025613	ENSMUSG00000057614	ENSMUSG00000035580
ENSMUSG00000033306	ENSMUSG00000035649	miRBase:MI0004653	ENSMUSG00000034098	ENSMUSG00000029381	ENSMUSG00000029772	ENSMUSG00000019820
ENSMUSG00000020189	ENSMUSG00000032562	ENSMUSG00000025264	ENSMUSG00000029017	ENSMUSG00000097069	ENSMUSG00000037884	ENSMUSG00000021774
ENSMUSG00000027858	ENSMUSG00000025014	ENSMUSG00000040560	ENSMUSG00000074384	ENSMUSG00000047246	ENSMUSG00000059288	ENSMUSG00000032274
ENSMUSG00000027642	ENSMUSG00000021270	ENSMUSG00000025324	ENSMUSG00000020652	ENSMUSG00000047261	ENSMUSG00000020793	ENSMUSG00000041920
ENSMUSG00000024640	ENSMUSG00000030507	ENSMUSG00000020422	ENSMUSG00000042410	ENSMUSG00000085958	ENSMUSG00000024248	ENSMUSG00000037455
ENSMUSG00000003206	ENSMUSG00000042869	ENSMUSG00000062444	ENSMUSG00000021520	ENSMUSG00000027829	ENSMUSG00000002996	ENSMUSG00000020413
ENSMUSG00000026356	ENSMUSG00000047446	ENSMUSG00000023247	ENSMUSG00000039782	ENSMUSG00000085641	ENSMUSG00000085515	ENSMUSG00000025393
ENSMUSG00000041301	ENSMUSG00000048490	ENSMUSG00000039318	ENSMUSG00000027400	ENSMUSG00000032333	ENSMUSG00000022439	ENSMUSG00000036617
ENSMUSG00000003644	ENSMUSG00000004698	ENSMUSG00000022847	ENSMUSG00000020248	ENSMUSG00000032518	ENSMUSG00000031490	ENSMUSG00000052056
ENSMUSG00000096068	ENSMUSG00000020361	ENSMUSG00000026659	ENSMUSG00000021748	ENSMUSG00000020798	ENSMUSG00000022270	ENSMUSG00000019920
ENSMUSG00000023087	ENSMUSG00000028864	ENSMUSG00000074622	ENSMUSG00000097403	ENSMUSG00000074375	ENSMUSG00000045671	ENSMUSG00000097587
ENSMUSG00000052581	ENSMUSG00000021149	ENSMUSG00000038344	ENSMUSG00000044748	ENSMUSG00000087648	ENSMUSG00000048562	ENSMUSG00000023885
ENSMUSG00000023073	ENSMUSG00000038533	ENSMUSG00000058183	ENSMUSG00000031530	ENSMUSG00000097610	ENSMUSG00000022474	ENSMUSG00000071451
ENSMUSG00000052469	ENSMUSG00000051285	ENSMUSG00000039067	ENSMUSG00000022801	ENSMUSG00000039607	ENSMUSG00000032009	ENSMUSG00000097398
ENSMUSG00000037171	ENSMUSG00000001576	ENSMUSG00000011256	ENSMUSG00000026238	ENSMUSG00000036611	ENSMUSG00000008575	ENSMUSG00000056941
ENSMUSG00000061315	ENSMUSG00000052681	ENSMUSG00000022657	ENSMUSG00000054612	ENSMUSG00000074802	ENSMUSG00000017688	ENSMUSG00000049680
ENSMUSG00000070733	ENSMUSG00000090667	ENSMUSG00000035754	ENSMUSG00000059246	ENSMUSG00000024109	ENSMUSG00000020859	ENSMUSG00000041241
ENSMUSG00000044772	ENSMUSG00000022656	ENSMUSG00000028134	ENSMUSG00000026866	ENSMUSG00000024013	ENSMUSG00000096965	ENSMUSG00000047216
ENSMUSG00000020109	ENSMUSG00000028252	ENSMUSG00000028986	ENSMUSG00000078671	ENSMUSG00000026037	ENSMUSG00000019854	ENSMUSG00000021282
ENSMUSG00000054099	ENSMUSG00000047324	ENSMUSG00000002307	ENSMUSG00000098682	ENSMUSG00000031913	ENSMUSG00000032228	ENSMUSG00000027620
ENSMUSG00000009073	ENSMUSG00000056821	ENSMUSG00000038331	ENSMUSG00000025702	ENSMUSG00000005610	ENSMUSG00000021686	ENSMUSG00000040952
ENSMUSG00000019373	ENSMUSG00000047215	ENSMUSG00000073678	ENSMUSG00000059586	ENSMUSG00000038007	ENSMUSG00000075324	ENSMUSG00000037307
ENSMUSG00000028788	ENSMUSG00000063060	ENSMUSG00000020634	ENSMUSG00000032864	ENSMUSG00000019849	ENSMUSG00000036275	ENSMUSG00000033857
ENSMUSG00000031432	ENSMUSG00000055737	ENSMUSG00000028184	ENSMUSG00000034940	ENSMUSG00000029910	ENSMUSG00000028191	ENSMUSG00000022010
ENSMUSG00000044066	ENSMUSG00000029202	ENSMUSG00000051736	ENSMUSG00000010435	ENSMUSG00000085580	ENSMUSG00000024302	ENSMUSG00000032289
ENSMUSG00000060733	ENSMUSG00000045103	ENSMUSG00000028189	ENSMUSG00000021366	ENSMUSG00000021629	ENSMUSG00000025887	ENSMUSG00000031565
ENSMUSG00000025591	ENSMUSG00000024042	ENSMUSG00000045180	ENSMUSG00000037894	ENSMUSG00000024789	ENSMUSG00000020078	ENSMUSG00000027201
ENSMUSG00000033307	miRBase:MI0026052	ENSMUSG00000043629	ENSMUSG00000032531	ENSMUSG00000025726	ENSMUSG00000041324	ENSMUSG00000091297
ENSMUSG00000079355	ENSMUSG00000050270	ENSMUSG00000039891	ENSMUSG00000016552	ENSMUSG00000020522	ENSMUSG00000020863	ENSMUSG00000028745
ENSMUSG00000029198	ENSMUSG00000020717	ENSMUSG00000041220	ENSMUSG00000021838	ENSMUSG00000009079	ENSMUSG00000025178	ENSMUSG00000060475
ENSMUSG00000003316	ENSMUSG00000008348	ENSMUSG00000023224	ENSMUSG00000020561	ENSMUSG00000020037	ENSMUSG00000043909	ENSMUSG00000026368
ENSMUSG00000063458	ENSMUSG00000038872	ENSMUSG00000026739	ENSMUSG00000028896	ENSMUSG00000037286	ENSMUSG00000005540	ENSMUSG00000058799
ENSMUSG00000024619	ENSMUSG00000097348	ENSMUSG00000021013	ENSMUSG00000028161	ENSMUSG00000027194	ENSMUSG00000055320	ENSMUSG00000056342
ENSMUSG00000024597	ENSMUSG00000027699	ENSMUSG00000038046	ENSMUSG00000046561	ENSMUSG00000020105	ENSMUSG00000037016	ENSMUSG00000042846
ENSMUSG00000031672	ENSMUSG00000032431	ENSMUSG00000020027	ENSMUSG00000021791	ENSMUSG00000091572	ENSMUSG00000083270	ENSMUSG00000078157
ENSMUSG00000036368	ENSMUSG00000025491	ENSMUSG00000022861	ENSMUSG00000027695	ENSMUSG00000027959	miRBase:MI0021950	ENSMUSG00000018974
ENSMUSG00000053367	ENSMUSG00000034154	ENSMUSG00000051650	ENSMUSG00000013584	ENSMUSG00000029859	ENSMUSG00000040009	ENSMUSG00000010538
ENSMUSG00000026872	ENSMUSG00000028420	ENSMUSG00000024758	ENSMUSG00000039174	ENSMUSG00000024949	ENSMUSG00000019947	ENSMUSG00000062901
ENSMUSG00000036499	ENSMUSG00000029762	miRBase:MI0000388	ENSMUSG00000031586	ENSMUSG00000022983	ENSMUSG00000071984	ENSMUSG00000037426
ENSMUSG00000041415	ENSMUSG00000029580	ENSMUSG00000093355	ENSMUSG00000030127	ENSMUSG00000022255	ENSMUSG00000036218	ENSMUSG00000040731
ENSMUSG00000029014	ENSMUSG00000020064	ENSMUSG00000037316	ENSMUSG00000030275	ENSMUSG00000036309	ENSMUSG00000031917	ENSMUSG00000038773
ENSMUSG00000029430	ENSMUSG00000008668	ENSMUSG00000024498	ENSMUSG00000055302	ENSMUSG00000038172	ENSMUSG00000033966	ENSMUSG00000030924
ENSMUSG00000086363	ENSMUSG00000021079	ENSMUSG00000032449	ENSMUSG00000047757	ENSMUSG00000024384	ENSMUSG00000011034	ENSMUSG00000092528
ENSMUSG00000057777	ENSMUSG00000022792	ENSMUSG00000033767	ENSMUSG00000024968	ENSMUSG00000044150	ENSMUSG00000022199	ENSMUSG00000030657
ENSMUSG00000061024	ENSMUSG00000027593	ENSMUSG00000036985	ENSMUSG00000039958	ENSMUSG00000024097	ENSMUSG00000030303	ENSMUSG00000044938
ENSMUSG00000095929	ENSMUSG00000070939	ENSMUSG00000044026	ENSMUSG00000032383	ENSMUSG00000064063	ENSMUSG00000027677	ENSMUSG00000057497
ENSMUSG00000044813	ENSMUSG00000001674	ENSMUSG00000026374	ENSMUSG00000063049	miRBase:MI0021585	ENSMUSG00000024528	ENSMUSG00000032263
ENSMUSG00000035873	ENSMUSG00000085112	ENSMUSG00000060038	ENSMUSG00000037681	ENSMUSG00000024570	ENSMUSG00000049940	ENSMUSG00000020372
ENSMUSG00000047888	ENSMUSG00000049904	ENSMUSG00000020694	ENSMUSG00000024317	ENSMUSG00000066568	ENSMUSG00000020015	ENSMUSG00000029817
ENSMUSG00000024501	ENSMUSG00000017969	ENSMUSG00000090160	ENSMUSG00000024234	ENSMUSG00000041765	ENSMUSG00000029516	ENSMUSG00000098179
ENSMUSG00000018076	ENSMUSG00000028826	ENSMUSG00000028919	ENSMUSG00000034354	ENSMUSG00000066500	ENSMUSG00000035666	ENSMUSG00000028517
ENSMUSG00000024376	ENSMUSG00000025969	ENSMUSG00000021185	ENSMUSG00000032637	ENSMUSG00000027864	ENSMUSG00000060780	ENSMUSG00000027940
ENSMUSG00000029015	ENSMUSG00000031578	ENSMUSG00000024826	ENSMUSG00000036438	ENSMUSG00000027367	ENSMUSG00000032399	ENSMUSG00000050697
ENSMUSG00000035247	miRBase:MI0021882	ENSMUSG00000034349	ENSMUSG00000031684	ENSMUSG00000044819	ENSMUSG00000019823	ENSMUSG00000049929
ENSMUSG00000036940	ENSMUSG00000055884	ENSMUSG00000032423	ENSMUSG00000019718	ENSMUSG00000043681	ENSMUSG00000041718	ENSMUSG00000027715
ENSMUSG00000029651	ENSMUSG00000035164	ENSMUSG00000038602	ENSMUSG00000060424	ENSMUSG00000056870	ENSMUSG00000034189	ENSMUSG00000034903
ENSMUSG00000024134	ENSMUSG00000032194	ENSMUSG00000022855	ENSMUSG00000028920	ENSMUSG00000044854	ENSMUSG00000045098	ENSMUSG00000033335
ENSMUSG00000031010	ENSMUSG00000031004	miRBase:MI0016973	ENSMUSG00000025959	ENSMUSG00000067028	ENSMUSG00000029344	ENSMUSG00000086219
ENSMUSG00000097462	ENSMUSG00000027329	ENSMUSG00000003418	ENSMUSG00000001918	ENSMUSG00000028906	ENSMUSG00000042943	ENSMUSG00000086080
ENSMUSG00000041540	ENSMUSG00000042549	ENSMUSG00000037242	ENSMUSG00000022551	ENSMUSG00000019461	ENSMUSG00000027568	ENSMUSG00000037110
ENSMUSG00000026554	ENSMUSG00000061762	ENSMUSG00000061048	ENSMUSG00000040420	ENSMUSG00000034617	ENSMUSG00000070498	ENSMUSG00000025739
ENSMUSG00000034021	ENSMUSG00000027433	ENSMUSG00000086025	ENSMUSG00000022894	ENSMUSG00000028646	ENSMUSG00000092113	ENSMUSG00000019802
ENSMUSG00000031878	ENSMUSG00000097775	ENSMUSG00000021218	ENSMUSG00000055835	ENSMUSG00000026797	ENSMUSG00000022587	ENSMUSG00000032309
ENSMUSG00000020794	ENSMUSG00000022136	ENSMUSG00000006494	ENSMUSG00000096986	ENSMUSG00000072683	ENSMUSG00000063229	ENSMUSG00000022710
ENSMUSG00000048834	ENSMUSG00000038259	ENSMUSG00000027379	ENSMUSG00000022790	ENSMUSG00000026790	ENSMUSG00000040183	ENSMUSG00000025453
ENSMUSG00000020457	ENSMUSG00000015766	ENSMUSG00000041417	ENSMUSG00000022507	ENSMUSG00000030543	ENSMUSG00000039367	ENSMUSG00000024608
ENSMUSG00000053560	ENSMUSG00000027206	ENSMUSG00000045598	ENSMUSG00000025764	ENSMUSG00000007850	ENSMUSG00000015243	miRBase:MI0014082
ENSMUSG00000024811	ENSMUSG00000032271	ENSMUSG00000029110	ENSMUSG00000042709	ENSMUSG00000069712	ENSMUSG00000020160	ENSMUSG00000004535
ENSMUSG00000015461	ENSMUSG00000055148	ENSMUSG00000045867	ENSMUSG00000028999	ENSMUSG00000042942	ENSMUSG00000024604	ENSMUSG00000041459
ENSMUSG00000020818	ENSMUSG00000038909	ENSMUSG00000036339	ENSMUSG00000020097	ENSMUSG00000034297	ENSMUSG00000054843	ENSMUSG00000038473
ENSMUSG00000046173	ENSMUSG00000036764	ENSMUSG00000019797	ENSMUSG00000028008	ENSMUSG00000033114	ENSMUSG00000049305	ENSMUSG00000061755
ENSMUSG00000000826	ENSMUSG00000043089	ENSMUSG00000039703	ENSMUSG00000042380	ENSMUSG00000020385	ENSMUSG00000026566	ENSMUSG00000040606
ENSMUSG00000040003	ENSMUSG00000024939	ENSMUSG00000051518	ENSMUSG00000026827	ENSMUSG00000053117	ENSMUSG00000097632	ENSMUSG00000020481
ENSMUSG00000040481	ENSMUSG00000047454	ENSMUSG00000012429	ENSMUSG00000087668	ENSMUSG00000040128	ENSMUSG00000018995	ENSMUSG00000028121
ENSMUSG00000002845	ENSMUSG00000032300	ENSMUSG00000069662	ENSMUSG00000024749	ENSMUSG00000047496	ENSMUSG00000027162	ENSMUSG00000027835
ENSMUSG00000047067	ENSMUSG00000030357	ENSMUSG00000085891	ENSMUSG00000039706	ENSMUSG00000038801	ENSMUSG00000063358	ENSMUSG00000025043
ENSMUSG00000062270	ENSMUSG00000085555	ENSMUSG00000024077	ENSMUSG00000022995	ENSMUSG00000039686	ENSMUSG00000043998	ENSMUSG00000040565
ENSMUSG00000039842	ENSMUSG00000036550	ENSMUSG00000019989	ENSMUSG00000027630	ENSMUSG00000031461	ENSMUSG00000028759	ENSMUSG00000026565
ENSMUSG00000037325	ENSMUSG00000074832	ENSMUSG00000037211	ENSMUSG00000027203	ENSMUSG00000025754	ENSMUSG00000029328	ENSMUSG00000091803
ENSMUSG00000024236	ENSMUSG00000022205	ENSMUSG00000022376	ENSMUSG00000028018	ENSMUSG00000062040	ENSMUSG00000019960	ENSMUSG00000052428
ENSMUSG00000036890	ENSMUSG00000048022	ENSMUSG00000016918	ENSMUSG00000028707	ENSMUSG00000040451	ENSMUSG00000028089	ENSMUSG00000046794
ENSMUSG00000042055	ENSMUSG00000028790	ENSMUSG00000068966	ENSMUSG00000032042	ENSMUSG00000026482	ENSMUSG00000028703	ENSMUSG00000028580
ENSMUSG00000032803	ENSMUSG00000042351	ENSMUSG00000000303	ENSMUSG00000014402	ENSMUSG00000006585	ENSMUSG00000044894	ENSMUSG00000053094
ENSMUSG00000024505	ENSMUSG00000023994	ENSMUSG00000028436	ENSMUSG00000075706	ENSMUSG00000041645	ENSMUSG00000020477	ENSMUSG00000067288
ENSMUSG00000009647	ENSMUSG00000029581	ENSMUSG00000004473	ENSMUSG00000022419	ENSMUSG00000028180	ENSMUSG00000021510	ENSMUSG00000032171
ENSMUSG00000026615	ENSMUSG00000071655	ENSMUSG00000018189	ENSMUSG00000028948	ENSMUSG00000030216	ENSMUSG00000057666	ENSMUSG00000016984
ENSMUSG00000006304	ENSMUSG00000026034	ENSMUSG00000046364	ENSMUSG00000021670	ENSMUSG00000035772	ENSMUSG00000039968	ENSMUSG00000026254
ENSMUSG00000025236	ENSMUSG00000047804	ENSMUSG00000029913	ENSMUSG00000030744	ENSMUSG00000028060	ENSMUSG00000066152	ENSMUSG00000054405
ENSMUSG00000003031	ENSMUSG00000005656	ENSMUSG00000002588	ENSMUSG00000027455	ENSMUSG00000036270	ENSMUSG00000040717	ENSMUSG00000064267
ENSMUSG00000000276	ENSMUSG00000024844	ENSMUSG00000018548	ENSMUSG00000023068	ENSMUSG00000040842	ENSMUSG00000028578	ENSMUSG00000026234
ENSMUSG00000047260	ENSMUSG00000025130	ENSMUSG00000002635	ENSMUSG00000006920	ENSMUSG00000020142	ENSMUSG00000052926	ENSMUSG00000068697
ENSMUSG00000049164	ENSMUSG00000031592	ENSMUSG00000039913	ENSMUSG00000071708	ENSMUSG00000044162	ENSMUSG00000032641	ENSMUSG00000045071
ENSMUSG00000041958	ENSMUSG00000054693	ENSMUSG00000026426	ENSMUSG00000023852	ENSMUSG00000019232	ENSMUSG00000028571	ENSMUSG00000068036
ENSMUSG00000085561	ENSMUSG00000033382	ENSMUSG00000021843	ENSMUSG00000003573	ENSMUSG00000055567	ENSMUSG00000027674	ENSMUSG00000020069
ENSMUSG00000042590	ENSMUSG00000066137	ENSMUSG00000035851	ENSMUSG00000006464	ENSMUSG00000052299	ENSMUSG00000038560	ENSMUSG00000008658
ENSMUSG00000004056	ENSMUSG00000036180	ENSMUSG00000047749	ENSMUSG00000026452	ENSMUSG00000056476	ENSMUSG00000013415	ENSMUSG00000048960
ENSMUSG00000039835	ENSMUSG00000057173	ENSMUSG00000060579	ENSMUSG00000073988	ENSMUSG00000053545	ENSMUSG00000035455	ENSMUSG00000027737
ENSMUSG00000031512	ENSMUSG00000053110	ENSMUSG00000021767	ENSMUSG00000044147	ENSMUSG00000045503	ENSMUSG00000067578	ENSMUSG00000022360
ENSMUSG00000022901	ENSMUSG00000090862	ENSMUSG00000058897	ENSMUSG00000034875	ENSMUSG00000054717	ENSMUSG00000025856	ENSMUSG00000026600
ENSMUSG00000009293	ENSMUSG00000037646	ENSMUSG00000028911	ENSMUSG00000022698	ENSMUSG00000041303	ENSMUSG00000097881	ENSMUSG00000063163
ENSMUSG00000029068	ENSMUSG00000097242	ENSMUSG00000024369	ENSMUSG00000048027	ENSMUSG00000029207	ENSMUSG00000027793	ENSMUSG00000020955
ENSMUSG00000049907	ENSMUSG00000022094	ENSMUSG00000050229	miRBase:MI0003716	ENSMUSG00000051853	ENSMUSG00000020657	ENSMUSG00000021759
ENSMUSG00000056899	ENSMUSG00000024360	ENSMUSG00000029026	ENSMUSG00000027312	ENSMUSG00000024120	ENSMUSG00000039756	ENSMUSG00000020823
ENSMUSG00000003955	ENSMUSG00000010936	ENSMUSG00000059659	ENSMUSG00000049728	ENSMUSG00000026987	ENSMUSG00000042138	ENSMUSG00000039191
ENSMUSG00000017221	ENSMUSG00000022884	ENSMUSG00000008683	ENSMUSG00000034101	ENSMUSG00000004568	ENSMUSG00000018501	ENSMUSG00000035770
ENSMUSG00000031446	ENSMUSG00000023022	ENSMUSG00000039697	ENSMUSG00000040464	ENSMUSG00000071337	ENSMUSG00000060510	ENSMUSG00000062353
ENSMUSG00000020719	ENSMUSG00000001366	ENSMUSG00000046598	ENSMUSG00000065640	ENSMUSG00000001707	ENSMUSG00000030432	ENSMUSG00000049076
ENSMUSG00000052533	ENSMUSG00000031537	ENSMUSG00000035399	ENSMUSG00000084780	ENSMUSG00000004455	ENSMUSG00000041168	ENSMUSG00000022353
ENSMUSG00000020400	ENSMUSG00000008892	ENSMUSG00000020038	ENSMUSG00000024335	ENSMUSG00000073627	ENSMUSG00000020315	ENSMUSG00000037364
ENSMUSG00000015869	ENSMUSG00000031696	ENSMUSG00000052957	ENSMUSG00000036391	ENSMUSG00000027404	ENSMUSG00000020091	ENSMUSG00000075044
ENSMUSG00000034165	ENSMUSG00000044934	ENSMUSG00000032279	ENSMUSG00000033499	ENSMUSG00000059070	ENSMUSG00000055102	ENSMUSG00000030697
ENSMUSG00000028032	ENSMUSG00000030722	ENSMUSG00000003848	ENSMUSG00000026525	ENSMUSG00000052146	ENSMUSG00000043091	ENSMUSG00000002343
ENSMUSG00000018770	ENSMUSG00000014550	ENSMUSG00000044098	ENSMUSG00000020184	ENSMUSG00000040511	ENSMUSG00000048732	ENSMUSG00000021133
ENSMUSG00000052906	ENSMUSG00000048076	ENSMUSG00000006599	ENSMUSG00000038095	ENSMUSG00000020994	ENSMUSG00000028741	ENSMUSG00000021024
ENSMUSG00000007815	ENSMUSG00000020495	ENSMUSG00000020720	ENSMUSG00000020212	ENSMUSG00000020897	ENSMUSG00000039804	ENSMUSG00000022957
ENSMUSG00000002524	ENSMUSG00000031561	ENSMUSG00000031818	ENSMUSG00000055204	ENSMUSG00000050271	ENSMUSG00000020649	ENSMUSG00000011179
ENSMUSG00000071573	ENSMUSG00000021546	ENSMUSG00000041949	ENSMUSG00000055725	ENSMUSG00000020888	ENSMUSG00000020079	ENSMUSG00000017561
ENSMUSG00000028081	ENSMUSG00000000346	ENSMUSG00000058793	ENSMUSG00000034037	ENSMUSG00000027668	ENSMUSG00000001036	ENSMUSG00000022462
ENSMUSG00000062127	ENSMUSG00000020307	miRBase:MI0018045	ENSMUSG00000007880	ENSMUSG00000024981	ENSMUSG00000026857	ENSMUSG00000047161
ENSMUSG00000008206	ENSMUSG00000097885	ENSMUSG00000035325	ENSMUSG00000008690	ENSMUSG00000023150	ENSMUSG00000040918	ENSMUSG00000027552
ENSMUSG00000014859	ENSMUSG00000087177	ENSMUSG00000014498	ENSMUSG00000029757	ENSMUSG00000046572	ENSMUSG00000039781	ENSMUSG00000050567
ENSMUSG00000032336	ENSMUSG00000019978	ENSMUSG00000078320	ENSMUSG00000045482	ENSMUSG00000027472	ENSMUSG00000029686	ENSMUSG00000040659
ENSMUSG00000033793	ENSMUSG00000021244	ENSMUSG00000016933	ENSMUSG00000038080	ENSMUSG00000022311	ENSMUSG00000027808	ENSMUSG00000040430
ENSMUSG00000040860	ENSMUSG00000032349	ENSMUSG00000052609	ENSMUSG00000041225	ENSMUSG00000053774	ENSMUSG00000022696	miRBase:MI0021878
ENSMUSG00000022295	ENSMUSG00000030117	ENSMUSG00000044221	ENSMUSG00000025007	ENSMUSG00000056537	ENSMUSG00000029776	ENSMUSG00000034544
ENSMUSG00000045328	ENSMUSG00000042364	ENSMUSG00000067855	ENSMUSG00000021669	ENSMUSG00000028514	ENSMUSG00000027184	ENSMUSG00000030878
ENSMUSG00000044477	ENSMUSG00000003308	ENSMUSG00000098040	ENSMUSG00000026740	ENSMUSG00000029038	ENSMUSG00000032615	ENSMUSG00000022124
ENSMUSG00000019841	ENSMUSG00000073774	ENSMUSG00000032481	ENSMUSG00000021448	ENSMUSG00000022303	ENSMUSG00000030452	ENSMUSG00000018858
ENSMUSG00000021493	ENSMUSG00000029104	ENSMUSG00000029554	ENSMUSG00000047094	ENSMUSG00000060673	ENSMUSG00000030231	ENSMUSG00000060499
ENSMUSG00000052934	ENSMUSG00000033257	ENSMUSG00000022715	ENSMUSG00000003099	ENSMUSG00000062300	ENSMUSG00000060985	ENSMUSG00000036894
ENSMUSG00000029993	ENSMUSG00000025939	ENSMUSG00000040710	ENSMUSG00000055436	ENSMUSG00000044252	ENSMUSG00000015305	ENSMUSG00000096421
ENSMUSG00000028945	ENSMUSG00000037465	ENSMUSG00000029500	ENSMUSG00000022336	ENSMUSG00000028133	ENSMUSG00000005506	ENSMUSG00000037234
ENSMUSG00000028016	ENSMUSG00000021756	ENSMUSG00000041235	ENSMUSG00000017781	ENSMUSG00000041774	ENSMUSG00000027466	ENSMUSG00000028330
ENSMUSG00000003970	ENSMUSG00000024590	ENSMUSG00000023932	ENSMUSG00000028034	ENSMUSG00000020149	ENSMUSG00000037204	ENSMUSG00000038965
ENSMUSG00000029787	ENSMUSG00000034317	ENSMUSG00000037243	ENSMUSG00000039218	ENSMUSG00000024002	ENSMUSG00000034681	ENSMUSG00000010755
ENSMUSG00000063457	ENSMUSG00000033157	ENSMUSG00000033658	ENSMUSG00000079295	ENSMUSG00000022751	ENSMUSG00000024081	ENSMUSG00000032575
ENSMUSG00000060601	ENSMUSG00000030031	ENSMUSG00000042207	ENSMUSG00000044847	ENSMUSG00000057113	ENSMUSG00000008129	ENSMUSG00000024969
ENSMUSG00000041740	ENSMUSG00000034175	ENSMUSG00000011752	ENSMUSG00000037486	ENSMUSG00000037143	ENSMUSG00000016541	ENSMUSG00000003435
ENSMUSG00000046447	ENSMUSG00000021096	ENSMUSG00000032422	ENSMUSG00000097174	ENSMUSG00000015671	ENSMUSG00000034667	ENSMUSG00000028385
ENSMUSG00000048310	ENSMUSG00000025747	ENSMUSG00000037266	ENSMUSG00000078812	ENSMUSG00000074884	ENSMUSG00000022860	ENSMUSG00000029501
ENSMUSG00000024594	ENSMUSG00000019188	ENSMUSG00000062542	ENSMUSG00000037236	ENSMUSG00000018068	ENSMUSG00000039834	ENSMUSG00000040396
ENSMUSG00000029394	ENSMUSG00000053916	ENSMUSG00000067150	ENSMUSG00000010277	ENSMUSG00000041763	ENSMUSG00000031703	ENSMUSG00000063273
ENSMUSG00000003200	ENSMUSG00000031985	ENSMUSG00000022601	ENSMUSG00000038069	ENSMUSG00000046691	ENSMUSG00000034994	ENSMUSG00000019878
ENSMUSG00000038717	ENSMUSG00000090137	ENSMUSG00000026657	ENSMUSG00000063953	ENSMUSG00000062470	ENSMUSG00000030738	ENSMUSG00000021576
ENSMUSG00000028820	ENSMUSG00000028676	ENSMUSG00000027881	ENSMUSG00000031819	ENSMUSG00000035105	ENSMUSG00000021003	ENSMUSG00000039741
ENSMUSG00000061313	ENSMUSG00000028837	ENSMUSG00000031885	ENSMUSG00000001525	ENSMUSG00000027244	ENSMUSG00000032504	ENSMUSG00000029486
ENSMUSG00000040054	ENSMUSG00000035681	ENSMUSG00000001472	ENSMUSG00000021207	ENSMUSG00000028654	ENSMUSG00000034083	ENSMUSG00000048163
ENSMUSG00000032897	ENSMUSG00000035367	ENSMUSG00000000131	ENSMUSG00000023156	ENSMUSG00000071497	ENSMUSG00000070697	ENSMUSG00000020463
ENSMUSG00000024780	ENSMUSG00000026669	ENSMUSG00000032878	ENSMUSG00000030313	ENSMUSG00000041396	ENSMUSG00000072791	ENSMUSG00000038582
ENSMUSG00000051344	ENSMUSG00000025381	ENSMUSG00000047412	ENSMUSG00000021362	ENSMUSG00000002748	ENSMUSG00000015165	ENSMUSG00000058729
ENSMUSG00000026761	ENSMUSG00000022536	ENSMUSG00000026735	ENSMUSG00000050608	ENSMUSG00000036817	ENSMUSG00000063694	ENSMUSG00000026778
ENSMUSG00000024118	miRBase:MI0000148	ENSMUSG00000041203	ENSMUSG00000031609	ENSMUSG00000030870	ENSMUSG00000040167	ENSMUSG00000020198
ENSMUSG00000055612	ENSMUSG00000017428	ENSMUSG00000020848	ENSMUSG00000063446	ENSMUSG00000033417	ENSMUSG00000020696	ENSMUSG00000038119
ENSMUSG00000045215	ENSMUSG00000048271	ENSMUSG00000041974	ENSMUSG00000006024	ENSMUSG00000032601	miRBase:MI0000157	ENSMUSG00000021178
ENSMUSG00000040385	ENSMUSG00000022100	ENSMUSG00000097252	ENSMUSG00000062257	ENSMUSG00000032212	ENSMUSG00000039193	ENSMUSG00000007656
ENSMUSG00000031667	ENSMUSG00000056158	ENSMUSG00000033740	ENSMUSG00000030069	ENSMUSG00000033917	ENSMUSG00000017724	ENSMUSG00000044820
ENSMUSG00000027006	ENSMUSG00000036452	ENSMUSG00000069920	ENSMUSG00000035049	ENSMUSG00000002297	ENSMUSG00000021495	ENSMUSG00000036026
ENSMUSG00000035941	ENSMUSG00000039231	ENSMUSG00000021068	ENSMUSG00000020718	ENSMUSG00000053846	ENSMUSG00000096697	ENSMUSG00000014313
ENSMUSG00000068079	ENSMUSG00000029407	ENSMUSG00000045410	ENSMUSG00000008384	ENSMUSG00000024232	ENSMUSG00000032513	ENSMUSG00000024843
ENSMUSG00000038607	ENSMUSG00000032737	ENSMUSG00000097553	ENSMUSG00000023030	ENSMUSG00000030811	ENSMUSG00000064871	ENSMUSG00000043424
ENSMUSG00000037169	ENSMUSG00000047613	ENSMUSG00000007812	ENSMUSG00000087487	ENSMUSG00000039985	ENSMUSG00000062209	ENSMUSG00000041695
ENSMUSG00000032217	ENSMUSG00000054733	ENSMUSG00000028982	ENSMUSG00000074886	ENSMUSG00000003279	ENSMUSG00000015755	ENSMUSG00000034342
ENSMUSG00000025898	ENSMUSG00000030269	ENSMUSG00000024213	ENSMUSG00000066894	ENSMUSG00000097934	ENSMUSG00000004317	ENSMUSG00000030513
ENSMUSG00000023350	ENSMUSG00000095432	ENSMUSG00000047371	ENSMUSG00000027349	ENSMUSG00000034126	ENSMUSG00000037957	ENSMUSG00000048874
ENSMUSG00000053153	ENSMUSG00000007379	ENSMUSG00000039167	ENSMUSG00000022261	ENSMUSG00000028149	ENSMUSG00000046186	ENSMUSG00000027573
ENSMUSG00000047250	ENSMUSG00000029203	ENSMUSG00000021377	ENSMUSG00000061175	ENSMUSG00000071547	ENSMUSG00000075266	ENSMUSG00000025880
ENSMUSG00000034158	ENSMUSG00000020163	ENSMUSG00000029504	ENSMUSG00000056498	ENSMUSG00000049866	miRBase:MI0000556	ENSMUSG00000049580
ENSMUSG00000079614	ENSMUSG00000037573	ENSMUSG00000025326	ENSMUSG00000000325	ENSMUSG00000074578	ENSMUSG00000028729	ENSMUSG00000030403
ENSMUSG00000038335	ENSMUSG00000032294	ENSMUSG00000028953	ENSMUSG00000025362	ENSMUSG00000004880	ENSMUSG00000032059	ENSMUSG00000062627
ENSMUSG00000021569	ENSMUSG00000001016	ENSMUSG00000020224	ENSMUSG00000027706	ENSMUSG00000004268	ENSMUSG00000063480	ENSMUSG00000028568
ENSMUSG00000032594	ENSMUSG00000083844	ENSMUSG00000025137	ENSMUSG00000020227	ENSMUSG00000036934	ENSMUSG00000031485	ENSMUSG00000031807
ENSMUSG00000064145	ENSMUSG00000020630	ENSMUSG00000039768	ENSMUSG00000059040	ENSMUSG00000033122	ENSMUSG00000036167	ENSMUSG00000031015
ENSMUSG00000026788	ENSMUSG00000027942	ENSMUSG00000022111	ENSMUSG00000043372	ENSMUSG00000026456	ENSMUSG00000028848	ENSMUSG00000018821
ENSMUSG00000029404	ENSMUSG00000047710	ENSMUSG00000058655	ENSMUSG00000040351	ENSMUSG00000035203	ENSMUSG00000035934	ENSMUSG00000015653
ENSMUSG00000027326	ENSMUSG00000026755	ENSMUSG00000021248	ENSMUSG00000030603	ENSMUSG00000043241	ENSMUSG00000002981	ENSMUSG00000023845
ENSMUSG00000035632	ENSMUSG00000060548	ENSMUSG00000039224	ENSMUSG00000028822	ENSMUSG00000048755	ENSMUSG00000005698	ENSMUSG00000034640
ENSMUSG00000020436	ENSMUSG00000068732	ENSMUSG00000052912	ENSMUSG00000060147	ENSMUSG00000031549	ENSMUSG00000025871	ENSMUSG00000025208
ENSMUSG00000050052	ENSMUSG00000001403	miRBase:MI0009921	ENSMUSG00000018293	ENSMUSG00000038481	ENSMUSG00000059436	ENSMUSG00000009013
ENSMUSG00000047921	ENSMUSG00000039701	ENSMUSG00000038622	ENSMUSG00000038462	ENSMUSG00000031645	ENSMUSG00000014226	ENSMUSG00000029028
ENSMUSG00000039515	ENSMUSG00000022682	ENSMUSG00000012535	ENSMUSG00000063316	ENSMUSG00000062075	ENSMUSG00000042079	ENSMUSG00000036781
ENSMUSG00000075072	ENSMUSG00000006589	ENSMUSG00000052557	ENSMUSG00000020741	ENSMUSG00000046591	ENSMUSG00000030423	ENSMUSG00000039219
ENSMUSG00000001056	ENSMUSG00000024073	ENSMUSG00000033732	miRBase:MI0026035	ENSMUSG00000031555	ENSMUSG00000024290	ENSMUSG00000025781
ENSMUSG00000045409	ENSMUSG00000054079	ENSMUSG00000021010	ENSMUSG00000010608	ENSMUSG00000003541	ENSMUSG00000020705	ENSMUSG00000078652
ENSMUSG00000037992	ENSMUSG00000025026	ENSMUSG00000071652	ENSMUSG00000037089	ENSMUSG00000048154	ENSMUSG00000027599	ENSMUSG00000002771
ENSMUSG00000036501	ENSMUSG00000021279	ENSMUSG00000041798	ENSMUSG00000027170	ENSMUSG00000031613	ENSMUSG00000054408	ENSMUSG00000038991
ENSMUSG00000031590	ENSMUSG00000024095	ENSMUSG00000038646	miRBase:MI0025029	ENSMUSG00000058558	ENSMUSG00000063895	ENSMUSG00000007739
ENSMUSG00000021764	ENSMUSG00000043456	ENSMUSG00000022992	ENSMUSG00000059811	ENSMUSG00000021556	ENSMUSG00000022895	ENSMUSG00000050890
ENSMUSG00000024580	ENSMUSG00000027248	ENSMUSG00000029438	ENSMUSG00000028140	ENSMUSG00000022780	ENSMUSG00000074227	ENSMUSG00000026094
ENSMUSG00000027351	ENSMUSG00000036160	ENSMUSG00000039748	ENSMUSG00000024817	ENSMUSG00000006276	ENSMUSG00000032599	ENSMUSG00000031447
ENSMUSG00000015880	ENSMUSG00000092341	ENSMUSG00000032030	ENSMUSG00000020308	ENSMUSG00000020708	ENSMUSG00000025220	ENSMUSG00000058355
ENSMUSG00000039117	ENSMUSG00000096630	ENSMUSG00000025049	ENSMUSG00000036816	ENSMUSG00000023263	ENSMUSG00000015377	ENSMUSG00000060261
ENSMUSG00000021065	ENSMUSG00000038388	ENSMUSG00000034820	ENSMUSG00000005803	ENSMUSG00000023968	ENSMUSG00000004677	ENSMUSG00000050917
ENSMUSG00000029538	ENSMUSG00000018322	ENSMUSG00000033557	ENSMUSG00000033579	ENSMUSG00000039770	ENSMUSG00000033629	ENSMUSG00000038895
ENSMUSG00000030802	ENSMUSG00000026824	ENSMUSG00000027361	ENSMUSG00000050435	ENSMUSG00000054191	ENSMUSG00000049411	ENSMUSG00000032590
ENSMUSG00000021478	ENSMUSG00000013629	ENSMUSG00000025862	ENSMUSG00000024219	ENSMUSG00000074994	ENSMUSG00000043067	ENSMUSG00000036403
ENSMUSG00000070730	ENSMUSG00000051236	ENSMUSG00000021222	ENSMUSG00000025809	ENSMUSG00000034488	ENSMUSG00000037138	ENSMUSG00000028944
ENSMUSG00000033953	ENSMUSG00000046314	ENSMUSG00000031584	ENSMUSG00000026729	ENSMUSG00000049109	ENSMUSG00000043060	ENSMUSG00000005899
ENSMUSG00000033014	ENSMUSG00000041649	ENSMUSG00000045967	ENSMUSG00000027868	ENSMUSG00000035329	ENSMUSG00000029089	ENSMUSG00000049349
ENSMUSG00000070544	ENSMUSG00000032846	ENSMUSG00000023036	ENSMUSG00000032468	ENSMUSG00000085704	ENSMUSG00000056459	ENSMUSG00000034467
ENSMUSG00000005696	ENSMUSG00000021785	ENSMUSG00000044125	ENSMUSG00000032745	ENSMUSG00000020585	ENSMUSG00000046733	ENSMUSG00000031839
ENSMUSG00000028830	ENSMUSG00000001127	ENSMUSG00000043445	ENSMUSG00000031610	ENSMUSG00000026049	ENSMUSG00000022426	ENSMUSG00000022742
ENSMUSG00000021870	ENSMUSG00000021745	ENSMUSG00000024782	ENSMUSG00000083282	ENSMUSG00000031902	ENSMUSG00000022026	ENSMUSG00000024810
ENSMUSG00000039990	ENSMUSG00000031217	ENSMUSG00000021681	ENSMUSG00000078578	ENSMUSG00000046755	ENSMUSG00000036402	ENSMUSG00000086013
ENSMUSG00000046157	ENSMUSG00000028546	ENSMUSG00000042414	ENSMUSG00000021000	ENSMUSG00000078429	ENSMUSG00000035933	ENSMUSG00000064210
ENSMUSG00000038780	ENSMUSG00000042447	ENSMUSG00000032340	ENSMUSG00000020023	ENSMUSG00000021577	ENSMUSG00000044744	ENSMUSG00000024091
ENSMUSG00000000544	ENSMUSG00000024101	ENSMUSG00000025041	ENSMUSG00000048826	ENSMUSG00000015749	ENSMUSG00000039682	ENSMUSG00000091867
ENSMUSG00000039308	ENSMUSG00000023951	ENSMUSG00000018405	ENSMUSG00000040389	ENSMUSG00000073434	ENSMUSG00000020114	ENSMUSG00000047719
ENSMUSG00000044030	ENSMUSG00000024754	ENSMUSG00000051166	ENSMUSG00000036636	ENSMUSG00000073423	ENSMUSG00000028618	ENSMUSG00000040725
ENSMUSG00000029591	ENSMUSG00000055610	ENSMUSG00000034906	ENSMUSG00000022945	ENSMUSG00000053801	ENSMUSG00000029472	ENSMUSG00000020181
ENSMUSG00000024260	ENSMUSG00000038816	ENSMUSG00000029730	ENSMUSG00000042396	ENSMUSG00000053907	ENSMUSG00000020832	ENSMUSG00000051896
ENSMUSG00000030264	ENSMUSG00000038611	ENSMUSG00000017404	ENSMUSG00000053332	ENSMUSG00000055319	ENSMUSG00000078765	ENSMUSG00000031527
ENSMUSG00000024145	ENSMUSG00000031847	ENSMUSG00000027475	ENSMUSG00000032815	ENSMUSG00000078789	ENSMUSG00000041629	ENSMUSG00000031986
ENSMUSG00000036534	ENSMUSG00000034424	ENSMUSG00000045969	ENSMUSG00000026020	ENSMUSG00000006471	ENSMUSG00000079426	ENSMUSG00000029076
ENSMUSG00000025544	ENSMUSG00000072878	ENSMUSG00000032407	ENSMUSG00000030062	ENSMUSG00000040919	ENSMUSG00000028809	ENSMUSG00000029387
ENSMUSG00000032560	ENSMUSG00000032827	ENSMUSG00000031540	ENSMUSG00000013160	ENSMUSG00000049281	ENSMUSG00000020653	ENSMUSG00000021733
ENSMUSG00000020484	ENSMUSG00000024622	ENSMUSG00000049969	ENSMUSG00000026806	ENSMUSG00000031862	ENSMUSG00000027637	ENSMUSG00000031671
ENSMUSG00000071054	ENSMUSG00000030346	ENSMUSG00000030421	ENSMUSG00000047084	ENSMUSG00000050079	ENSMUSG00000003847	ENSMUSG00000018412
ENSMUSG00000033565	ENSMUSG00000041747	ENSMUSG00000028345	ENSMUSG00000020530	ENSMUSG00000078496	ENSMUSG00000045411	ENSMUSG00000038523
ENSMUSG00000074794	ENSMUSG00000021276	ENSMUSG00000020792	ENSMUSG00000052707	ENSMUSG00000034259	ENSMUSG00000022312	ENSMUSG00000018362
ENSMUSG00000015962	ENSMUSG00000026470	ENSMUSG00000000759	ENSMUSG00000033434	miRBase:MI0014025	ENSMUSG00000028959	ENSMUSG00000045248
ENSMUSG00000026914	ENSMUSG00000050600	ENSMUSG00000024325	ENSMUSG00000033430	ENSMUSG00000022783	ENSMUSG00000019996	ENSMUSG00000022913
ENSMUSG00000022849	ENSMUSG00000018415	ENSMUSG00000024812	ENSMUSG00000034252	ENSMUSG00000024668	ENSMUSG00000041697	ENSMUSG00000040268
ENSMUSG00000024327	ENSMUSG00000000976	ENSMUSG00000056579	ENSMUSG00000037275	ENSMUSG00000038084	ENSMUSG00000093904	ENSMUSG00000007610
ENSMUSG00000031508	ENSMUSG00000004642	ENSMUSG00000034218	ENSMUSG00000018736	ENSMUSG00000079184	ENSMUSG00000031533	ENSMUSG00000030553
ENSMUSG00000043872	ENSMUSG00000062762	ENSMUSG00000034990	ENSMUSG00000073702	ENSMUSG00000001018	ENSMUSG00000020700	ENSMUSG00000029705
ENSMUSG00000068015	ENSMUSG00000031935	ENSMUSG00000071172	ENSMUSG00000046380	ENSMUSG00000022517	ENSMUSG00000097785	ENSMUSG00000041231
ENSMUSG00000018417	ENSMUSG00000014856	ENSMUSG00000037101	ENSMUSG00000029152	ENSMUSG00000047417	ENSMUSG00000027655	ENSMUSG00000003235
ENSMUSG00000019796	ENSMUSG00000029287	ENSMUSG00000010911	ENSMUSG00000031682	ENSMUSG00000029169	ENSMUSG00000034120	ENSMUSG00000053184
ENSMUSG00000039671	ENSMUSG00000037795	ENSMUSG00000040446	ENSMUSG00000026021	ENSMUSG00000020288	ENSMUSG00000028567	ENSMUSG00000024045
ENSMUSG00000097735	ENSMUSG00000026377	ENSMUSG00000071072	ENSMUSG00000020180	ENSMUSG00000074698	ENSMUSG00000027804	ENSMUSG00000031666
ENSMUSG00000020883	ENSMUSG00000026229	ENSMUSG00000043207	ENSMUSG00000030469	ENSMUSG00000033530	ENSMUSG00000041378	ENSMUSG00000027423
ENSMUSG00000002781	ENSMUSG00000031835	ENSMUSG00000009630	ENSMUSG00000017831	ENSMUSG00000069895	ENSMUSG00000021693	ENSMUSG00000020257
ENSMUSG00000028010	ENSMUSG00000068115	ENSMUSG00000002413	ENSMUSG00000006014	ENSMUSG00000032318	ENSMUSG00000026924	ENSMUSG00000020362
ENSMUSG00000028668	miRBase:MI0021958	ENSMUSG00000014195	ENSMUSG00000001065	ENSMUSG00000038544	ENSMUSG00000022201	ENSMUSG00000048578
ENSMUSG00000037692	ENSMUSG00000030551	ENSMUSG00000038416	ENSMUSG00000056755	ENSMUSG00000031893	ENSMUSG00000032290	ENSMUSG00000053536
ENSMUSG00000041236	ENSMUSG00000030245	ENSMUSG00000029464	ENSMUSG00000022052	ENSMUSG00000040102	ENSMUSG00000062234	ENSMUSG00000020882
ENSMUSG00000000441	ENSMUSG00000085227	ENSMUSG00000023944	ENSMUSG00000052915	ENSMUSG00000048758	ENSMUSG00000041346	ENSMUSG00000041921
ENSMUSG00000038762	ENSMUSG00000042167	ENSMUSG00000062098	ENSMUSG00000022897	ENSMUSG00000068856	ENSMUSG00000029238	ENSMUSG00000054409
ENSMUSG00000028382	ENSMUSG00000099170	ENSMUSG00000021687	ENSMUSG00000062309	ENSMUSG00000026721	ENSMUSG00000021994	ENSMUSG00000038384
ENSMUSG00000002409	ENSMUSG00000026918	ENSMUSG00000037949	ENSMUSG00000073563	ENSMUSG00000035048	ENSMUSG00000039987	ENSMUSG00000003752
ENSMUSG00000036030	ENSMUSG00000038784	ENSMUSG00000070462	ENSMUSG00000015647	ENSMUSG00000021313	ENSMUSG00000027198	ENSMUSG00000030232
ENSMUSG00000030760	ENSMUSG00000046138	ENSMUSG00000021797	ENSMUSG00000029050	ENSMUSG00000033491	ENSMUSG00000058440	ENSMUSG00000042211
ENSMUSG00000012076	ENSMUSG00000032328	ENSMUSG00000070576	ENSMUSG00000026977	ENSMUSG00000000134	ENSMUSG00000040945	ENSMUSG00000041351
ENSMUSG00000030450	ENSMUSG00000063529	ENSMUSG00000004096	ENSMUSG00000054555	ENSMUSG00000033294	ENSMUSG00000041130	ENSMUSG00000022125
ENSMUSG00000035354	ENSMUSG00000087137	ENSMUSG00000029469	ENSMUSG00000029822	ENSMUSG00000073555	ENSMUSG00000048668	ENSMUSG00000087175
ENSMUSG00000025066	ENSMUSG00000034290	ENSMUSG00000054770	ENSMUSG00000021977	ENSMUSG00000014601	ENSMUSG00000026965	ENSMUSG00000046079
ENSMUSG00000039480	ENSMUSG00000029155	ENSMUSG00000073147	ENSMUSG00000021773	ENSMUSG00000027422	ENSMUSG00000057858	ENSMUSG00000028293
ENSMUSG00000003119	ENSMUSG00000022013	ENSMUSG00000038943	ENSMUSG00000022412	ENSMUSG00000071262	ENSMUSG00000037112	ENSMUSG00000037876
ENSMUSG00000027777	ENSMUSG00000020827	ENSMUSG00000020021	ENSMUSG00000001089	ENSMUSG00000033478	ENSMUSG00000001017	ENSMUSG00000026171
ENSMUSG00000032688	ENSMUSG00000087455	ENSMUSG00000032269	ENSMUSG00000022362	ENSMUSG00000024581	ENSMUSG00000039106	ENSMUSG00000038485
ENSMUSG00000029086	ENSMUSG00000067173	ENSMUSG00000028943	ENSMUSG00000041625	ENSMUSG00000020621	ENSMUSG00000031622	ENSMUSG00000053483
ENSMUSG00000016940	ENSMUSG00000046818	ENSMUSG00000036430	ENSMUSG00000026596	ENSMUSG00000075304	ENSMUSG00000039676	ENSMUSG00000097466
ENSMUSG00000085495	ENSMUSG00000008999	ENSMUSG00000021051	ENSMUSG00000029924	miRBase:MI0021912	ENSMUSG00000041607	ENSMUSG00000025986
ENSMUSG00000032017	ENSMUSG00000038366	ENSMUSG00000035765	ENSMUSG00000025034	ENSMUSG00000033964	ENSMUSG00000021113	ENSMUSG00000022110
ENSMUSG00000039629	ENSMUSG00000024242	ENSMUSG00000029577	ENSMUSG00000005936	ENSMUSG00000020704	ENSMUSG00000047388	ENSMUSG00000034024
ENSMUSG00000032338	ENSMUSG00000030726	ENSMUSG00000056133	ENSMUSG00000028312	ENSMUSG00000060657	ENSMUSG00000028630	ENSMUSG00000020849
ENSMUSG00000029227	ENSMUSG00000031442	ENSMUSG00000024527	ENSMUSG00000028207	ENSMUSG00000030043	ENSMUSG00000020946	ENSMUSG00000024268
ENSMUSG00000003528	ENSMUSG00000045005	ENSMUSG00000028789	ENSMUSG00000024759	ENSMUSG00000058013	ENSMUSG00000043671	ENSMUSG00000022867
ENSMUSG00000034575	ENSMUSG00000032254	ENSMUSG00000032316	ENSMUSG00000005447	ENSMUSG00000072694	ENSMUSG00000030451	ENSMUSG00000037885
ENSMUSG00000047423	ENSMUSG00000032352	ENSMUSG00000029142	ENSMUSG00000020137	ENSMUSG00000065126	ENSMUSG00000023286	ENSMUSG00000039016
ENSMUSG00000018541	ENSMUSG00000028693	ENSMUSG00000001632	ENSMUSG00000024791	ENSMUSG00000020459	ENSMUSG00000034587	ENSMUSG00000018707
ENSMUSG00000032097	ENSMUSG00000026766	ENSMUSG00000022394	ENSMUSG00000062647	ENSMUSG00000052488	ENSMUSG00000029513	ENSMUSG00000024772
ENSMUSG00000024231	miRBase:MI0021877	ENSMUSG00000049796	ENSMUSG00000041147	ENSMUSG00000044014	ENSMUSG00000052253	ENSMUSG00000023723
ENSMUSG00000035133	ENSMUSG00000035623	ENSMUSG00000019977	ENSMUSG00000070934	ENSMUSG00000022554	ENSMUSG00000075700	ENSMUSG00000085492
ENSMUSG00000098702	ENSMUSG00000039456	ENSMUSG00000074088	ENSMUSG00000034321	ENSMUSG00000001855	ENSMUSG00000024217	ENSMUSG00000032397
ENSMUSG00000031949	ENSMUSG00000057863	ENSMUSG00000034201	ENSMUSG00000033065	ENSMUSG00000025580	ENSMUSG00000085156	ENSMUSG00000020949
ENSMUSG00000063856	ENSMUSG00000023106	ENSMUSG00000032477	ENSMUSG00000024258	ENSMUSG00000027282	ENSMUSG00000002320	ENSMUSG00000035949
ENSMUSG00000029063	ENSMUSG00000037605	ENSMUSG00000024991	ENSMUSG00000072492	ENSMUSG00000048832	ENSMUSG00000006998	ENSMUSG00000032410
ENSMUSG00000030225	ENSMUSG00000038871	ENSMUSG00000015942	ENSMUSG00000037805	ENSMUSG00000021134	ENSMUSG00000033931	ENSMUSG00000049295
ENSMUSG00000053436	ENSMUSG00000014074	ENSMUSG00000020196	ENSMUSG00000019432	ENSMUSG00000017421	ENSMUSG00000009112	ENSMUSG00000028086
ENSMUSG00000040822	ENSMUSG00000016253	ENSMUSG00000045631	ENSMUSG00000025873	ENSMUSG00000028211	ENSMUSG00000056687	ENSMUSG00000003808
ENSMUSG00000055817	ENSMUSG00000053286	ENSMUSG00000061787	ENSMUSG00000025240	ENSMUSG00000001228	ENSMUSG00000023953	ENSMUSG00000032077
ENSMUSG00000003421	ENSMUSG00000020368	ENSMUSG00000025583	ENSMUSG00000031858	ENSMUSG00000054823	ENSMUSG00000024908	ENSMUSG00000031864
ENSMUSG00000039509	ENSMUSG00000028955	ENSMUSG00000032199	ENSMUSG00000032393	ENSMUSG00000029283	ENSMUSG00000019861	ENSMUSG00000026646
ENSMUSG00000023084	ENSMUSG00000041734	ENSMUSG00000021911	ENSMUSG00000074476	ENSMUSG00000029414	ENSMUSG00000034088	ENSMUSG00000050222
ENSMUSG00000024276	ENSMUSG00000041431	ENSMUSG00000026111	ENSMUSG00000022752	ENSMUSG00000030539	ENSMUSG00000014959	ENSMUSG00000055210
ENSMUSG00000021385	ENSMUSG00000027615	ENSMUSG00000030978	ENSMUSG00000018921	ENSMUSG00000078957	ENSMUSG00000010406	ENSMUSG00000036768
ENSMUSG00000029147	ENSMUSG00000034998	ENSMUSG00000020917	ENSMUSG00000031600	ENSMUSG00000026317	ENSMUSG00000031753	ENSMUSG00000016946
ENSMUSG00000020745	ENSMUSG00000020461	ENSMUSG00000040112	ENSMUSG00000025730	ENSMUSG00000035521	ENSMUSG00000033918	ENSMUSG00000020526
ENSMUSG00000041781	ENSMUSG00000030880	ENSMUSG00000035266	ENSMUSG00000036898	ENSMUSG00000074627	ENSMUSG00000013878	ENSMUSG00000018661
ENSMUSG00000042489	ENSMUSG00000009470	ENSMUSG00000042015	ENSMUSG00000024579	ENSMUSG00000044254	ENSMUSG00000097052	ENSMUSG00000040225
ENSMUSG00000030619	ENSMUSG00000052298	ENSMUSG00000057522	ENSMUSG00000029598	ENSMUSG00000051495	ENSMUSG00000028886	miRBase:MI0018039
ENSMUSG00000026495	ENSMUSG00000021066	ENSMUSG00000005483	ENSMUSG00000098789	ENSMUSG00000028452	ENSMUSG00000029512	ENSMUSG00000032437
ENSMUSG00000024160	ENSMUSG00000013593	ENSMUSG00000046865	ENSMUSG00000025081	ENSMUSG00000033237	ENSMUSG00000021922	ENSMUSG00000010097
ENSMUSG00000034501	ENSMUSG00000086859	ENSMUSG00000064563	ENSMUSG00000022228	ENSMUSG00000066148	ENSMUSG00000085024	ENSMUSG00000064968
ENSMUSG00000068039	ENSMUSG00000037072	ENSMUSG00000018666	ENSMUSG00000036737	ENSMUSG00000018433	ENSMUSG00000035529	ENSMUSG00000047146
ENSMUSG00000035126	ENSMUSG00000047938	ENSMUSG00000028910	ENSMUSG00000052407	ENSMUSG00000021532	ENSMUSG00000059495	ENSMUSG00000040548
ENSMUSG00000042961	ENSMUSG00000023118	ENSMUSG00000097048	ENSMUSG00000027861	ENSMUSG00000053134	ENSMUSG00000021607	ENSMUSG00000028979
ENSMUSG00000002250	ENSMUSG00000090083	ENSMUSG00000034042	ENSMUSG00000018820	ENSMUSG00000027752	ENSMUSG00000025162	ENSMUSG00000024525
ENSMUSG00000043015	ENSMUSG00000018931	ENSMUSG00000042508	ENSMUSG00000041028	ENSMUSG00000020076	ENSMUSG00000035637	ENSMUSG00000022248
ENSMUSG00000041328	ENSMUSG00000061458	ENSMUSG00000035095	ENSMUSG00000007836	ENSMUSG00000049932	ENSMUSG00000045795	ENSMUSG00000039183
ENSMUSG00000041809	ENSMUSG00000022443	ENSMUSG00000038323	ENSMUSG00000085628	ENSMUSG00000001379	ENSMUSG00000028923	ENSMUSG00000074656
ENSMUSG00000031781	ENSMUSG00000037474	ENSMUSG00000029405	ENSMUSG00000032939	ENSMUSG00000005846	ENSMUSG00000029049	ENSMUSG00000013155
ENSMUSG00000036810	ENSMUSG00000089992	ENSMUSG00000020650	ENSMUSG00000035898	ENSMUSG00000038495	ENSMUSG00000055633	ENSMUSG00000021982
ENSMUSG00000021662	ENSMUSG00000066877	ENSMUSG00000021379	ENSMUSG00000047945	ENSMUSG00000051444	ENSMUSG00000053113	ENSMUSG00000061474
ENSMUSG00000098008	ENSMUSG00000022914	ENSMUSG00000024889	ENSMUSG00000026584	ENSMUSG00000056197	ENSMUSG00000019951	ENSMUSG00000035067
ENSMUSG00000027663	ENSMUSG00000022064	ENSMUSG00000039473	ENSMUSG00000041058	ENSMUSG00000036103	ENSMUSG00000006445	ENSMUSG00000063600
ENSMUSG00000022141	ENSMUSG00000020716	ENSMUSG00000025200	ENSMUSG00000028488	ENSMUSG00000073236	ENSMUSG00000037174	ENSMUSG00000038691
ENSMUSG00000024098	ENSMUSG00000002416	ENSMUSG00000024212	ENSMUSG00000044279	ENSMUSG00000070583	ENSMUSG00000032267	ENSMUSG00000060681
ENSMUSG00000056738	ENSMUSG00000022288	ENSMUSG00000056458	ENSMUSG00000027522	ENSMUSG00000021431	ENSMUSG00000023908	ENSMUSG00000041132
ENSMUSG00000020086	ENSMUSG00000040929	ENSMUSG00000024085	ENSMUSG00000025223	ENSMUSG00000068663	ENSMUSG00000026510	ENSMUSG00000039917
ENSMUSG00000005982	ENSMUSG00000001833	ENSMUSG00000002820	ENSMUSG00000064310	ENSMUSG00000009927	miRBase:MI0021927	ENSMUSG00000046798
ENSMUSG00000033752	ENSMUSG00000037434	ENSMUSG00000020664	ENSMUSG00000026014	ENSMUSG00000019998	ENSMUSG00000042308	ENSMUSG00000049327
ENSMUSG00000025464	ENSMUSG00000097404	ENSMUSG00000083616	ENSMUSG00000042064	ENSMUSG00000022969	ENSMUSG00000041135	ENSMUSG00000063015
ENSMUSG00000029313	ENSMUSG00000042772	ENSMUSG00000022789	ENSMUSG00000036469	ENSMUSG00000038764	ENSMUSG00000031904	ENSMUSG00000024480
ENSMUSG00000020893	ENSMUSG00000053510	ENSMUSG00000024068	ENSMUSG00000015839	ENSMUSG00000036892	ENSMUSG00000054162	ENSMUSG00000029684
ENSMUSG00000021485	ENSMUSG00000024151	ENSMUSG00000022544	ENSMUSG00000031841	ENSMUSG00000022285	ENSMUSG00000041297	ENSMUSG00000026447
miRBase:MI0000687	ENSMUSG00000029754	ENSMUSG00000042500	ENSMUSG00000018924	ENSMUSG00000025892	ENSMUSG00000027671	ENSMUSG00000022828
ENSMUSG00000025410	ENSMUSG00000027905	ENSMUSG00000033545	ENSMUSG00000026544	ENSMUSG00000028760	ENSMUSG00000041638	ENSMUSG00000055652
ENSMUSG00000021549	ENSMUSG00000084925	ENSMUSG00000023232	ENSMUSG00000036078	ENSMUSG00000022973	ENSMUSG00000073982	ENSMUSG00000030867
ENSMUSG00000090112	ENSMUSG00000029998	miRBase:MI0018042	ENSMUSG00000020962	ENSMUSG00000016619	ENSMUSG00000071379	ENSMUSG00000086807
ENSMUSG00000022863	ENSMUSG00000035248	ENSMUSG00000036564	ENSMUSG00000026211	ENSMUSG00000050288	ENSMUSG00000040297	ENSMUSG00000022023
ENSMUSG00000025016	ENSMUSG00000071226	ENSMUSG00000057223	ENSMUSG00000060671	ENSMUSG00000021177	ENSMUSG00000041215	ENSMUSG00000030302
ENSMUSG00000019826	ENSMUSG00000030541	ENSMUSG00000000378	ENSMUSG00000042988	ENSMUSG00000020108	ENSMUSG00000038351	ENSMUSG00000021796
ENSMUSG00000005034	ENSMUSG00000052155	ENSMUSG00000020143	ENSMUSG00000003228	ENSMUSG00000021752	ENSMUSG00000055660	ENSMUSG00000032966
ENSMUSG00000028310	ENSMUSG00000045201	ENSMUSG00000034689	ENSMUSG00000047079	ENSMUSG00000025193	ENSMUSG00000037652	ENSMUSG00000038056
ENSMUSG00000022971	ENSMUSG00000025246	ENSMUSG00000090100	ENSMUSG00000018572	ENSMUSG00000037706	ENSMUSG00000032239	ENSMUSG00000050930
ENSMUSG00000049470	ENSMUSG00000043131	ENSMUSG00000021967	miRBase:MI0026026	ENSMUSG00000036036	ENSMUSG00000028530	ENSMUSG00000062202
ENSMUSG00000062661	ENSMUSG00000037526	ENSMUSG00000074746	ENSMUSG00000000296	ENSMUSG00000017264	ENSMUSG00000037197	ENSMUSG00000034471
ENSMUSG00000018677	ENSMUSG00000043831	ENSMUSG00000020397	ENSMUSG00000057181	ENSMUSG00000020255	ENSMUSG00000056145	ENSMUSG00000024539
ENSMUSG00000040006	ENSMUSG00000097172	ENSMUSG00000044447	ENSMUSG00000020130	ENSMUSG00000021240	ENSMUSG00000033717	ENSMUSG00000033161
ENSMUSG00000092086	ENSMUSG00000052456	ENSMUSG00000061904	ENSMUSG00000036281	ENSMUSG00000004897	ENSMUSG00000002083	ENSMUSG00000046516
ENSMUSG00000020250	ENSMUSG00000029366	ENSMUSG00000032244	ENSMUSG00000062619	ENSMUSG00000018239	ENSMUSG00000024735	ENSMUSG00000053289
ENSMUSG00000049494	ENSMUSG00000093930	ENSMUSG00000043284	ENSMUSG00000037997	ENSMUSG00000045973	ENSMUSG00000026380	ENSMUSG00000026039
ENSMUSG00000022663	ENSMUSG00000078796	ENSMUSG00000086209	ENSMUSG00000021692	ENSMUSG00000001175	ENSMUSG00000038542	ENSMUSG00000042751
ENSMUSG00000025728	ENSMUSG00000020739	ENSMUSG00000024048	ENSMUSG00000097121	ENSMUSG00000039828	ENSMUSG00000029922	ENSMUSG00000005981
ENSMUSG00000031954	ENSMUSG00000035597	ENSMUSG00000006715	ENSMUSG00000002477	ENSMUSG00000023104	ENSMUSG00000032348	ENSMUSG00000030591
ENSMUSG00000001467	ENSMUSG00000020737	ENSMUSG00000002129	ENSMUSG00000024054	ENSMUSG00000022114	ENSMUSG00000003731	ENSMUSG00000014426
ENSMUSG00000045624	ENSMUSG00000003033	ENSMUSG00000025980	ENSMUSG00000040720	ENSMUSG00000021958	ENSMUSG00000000088	ENSMUSG00000003423
ENSMUSG00000042353	ENSMUSG00000033128	ENSMUSG00000042197	ENSMUSG00000004100	ENSMUSG00000004394	ENSMUSG00000022151	ENSMUSG00000024312
ENSMUSG00000024006	ENSMUSG00000070283	ENSMUSG00000043733	ENSMUSG00000052981	ENSMUSG00000027288	ENSMUSG00000039463	ENSMUSG00000029642
ENSMUSG00000036693	ENSMUSG00000066232	ENSMUSG00000034826	ENSMUSG00000053684	ENSMUSG00000041438	ENSMUSG00000000399	ENSMUSG00000001983
ENSMUSG00000006127	ENSMUSG00000038664	ENSMUSG00000057706	ENSMUSG00000030402	ENSMUSG00000029335	ENSMUSG00000001844	ENSMUSG00000052997
ENSMUSG00000024613	ENSMUSG00000022178	ENSMUSG00000041126	ENSMUSG00000044452	ENSMUSG00000029127	ENSMUSG00000050107	ENSMUSG00000035227
ENSMUSG00000021608	ENSMUSG00000024436	ENSMUSG00000037085	ENSMUSG00000020687	ENSMUSG00000049881	ENSMUSG00000041679	ENSMUSG00000026436
ENSMUSG00000002741	ENSMUSG00000025794	ENSMUSG00000026455	ENSMUSG00000028165	ENSMUSG00000056167	ENSMUSG00000037070	ENSMUSG00000027193
ENSMUSG00000042572	ENSMUSG00000042895	ENSMUSG00000032440	ENSMUSG00000020900	ENSMUSG00000029458	ENSMUSG00000056952	ENSMUSG00000048279
ENSMUSG00000029186	ENSMUSG00000097061	ENSMUSG00000024190	ENSMUSG00000019804	ENSMUSG00000026516	ENSMUSG00000017765	ENSMUSG00000028639
ENSMUSG00000021286	ENSMUSG00000020658	ENSMUSG00000055553	ENSMUSG00000015656	ENSMUSG00000030695	ENSMUSG00000024188	ENSMUSG00000015357
ENSMUSG00000020460	ENSMUSG00000032400	ENSMUSG00000071528	ENSMUSG00000049755	ENSMUSG00000057778	ENSMUSG00000062169	ENSMUSG00000061979
ENSMUSG00000004768	ENSMUSG00000032621	ENSMUSG00000022556	ENSMUSG00000035206	ENSMUSG00000078974	ENSMUSG00000029625	ENSMUSG00000036980
ENSMUSG00000027305	ENSMUSG00000065097	ENSMUSG00000079437	ENSMUSG00000002308	ENSMUSG00000028329	ENSMUSG00000070695	ENSMUSG00000062248
ENSMUSG00000068749	ENSMUSG00000020390	ENSMUSG00000014850	ENSMUSG00000021368	ENSMUSG00000049606	ENSMUSG00000032740	ENSMUSG00000021039
ENSMUSG00000089704	ENSMUSG00000029416	ENSMUSG00000027564	ENSMUSG00000026496	ENSMUSG00000020802	ENSMUSG00000032350	ENSMUSG00000041000
ENSMUSG00000037343	ENSMUSG00000036661	ENSMUSG00000006378	ENSMUSG00000057236	ENSMUSG00000094483	ENSMUSG00000068206	ENSMUSG00000003436
ENSMUSG00000032834	ENSMUSG00000046909	ENSMUSG00000068328	ENSMUSG00000059981	ENSMUSG00000027030	ENSMUSG00000039497	ENSMUSG00000039286
ENSMUSG00000068922	ENSMUSG00000026571	ENSMUSG00000087380	ENSMUSG00000043962	ENSMUSG00000091519	ENSMUSG00000020087	ENSMUSG00000024069
ENSMUSG00000057982	ENSMUSG00000033799	ENSMUSG00000039801	ENSMUSG00000029766	ENSMUSG00000034190	ENSMUSG00000033938	ENSMUSG00000078521
ENSMUSG00000018727	ENSMUSG00000048385	ENSMUSG00000054611	ENSMUSG00000059119	ENSMUSG00000042558	ENSMUSG00000038500	ENSMUSG00000030967
ENSMUSG00000028936	ENSMUSG00000025428	ENSMUSG00000031729	ENSMUSG00000024392	ENSMUSG00000043716	ENSMUSG00000024137	ENSMUSG00000020220
ENSMUSG00000031714	ENSMUSG00000075701	ENSMUSG00000031523	ENSMUSG00000059920	ENSMUSG00000031988	ENSMUSG00000020628	ENSMUSG00000020451
ENSMUSG00000019471	ENSMUSG00000041408	ENSMUSG00000037300	ENSMUSG00000006333	ENSMUSG00000019699	ENSMUSG00000035212	ENSMUSG00000027429
ENSMUSG00000072893	ENSMUSG00000047514	ENSMUSG00000046311	ENSMUSG00000019842	ENSMUSG00000032096	ENSMUSG00000037533	ENSMUSG00000029780
ENSMUSG00000004319	ENSMUSG00000041477	ENSMUSG00000032403	ENSMUSG00000025521	ENSMUSG00000049321	ENSMUSG00000051235	ENSMUSG00000025155
ENSMUSG00000013033	ENSMUSG00000040423	ENSMUSG00000060216	ENSMUSG00000040521	ENSMUSG00000032977	ENSMUSG00000029918	ENSMUSG00000022898
ENSMUSG00000008318	ENSMUSG00000039427	ENSMUSG00000023911	ENSMUSG00000029389	ENSMUSG00000061286	ENSMUSG00000023169	ENSMUSG00000050796
ENSMUSG00000032555	ENSMUSG00000018287	ENSMUSG00000025351	ENSMUSG00000015837	ENSMUSG00000026848	ENSMUSG00000051256	ENSMUSG00000067274
ENSMUSG00000039057	ENSMUSG00000030224	ENSMUSG00000020894	ENSMUSG00000039512	ENSMUSG00000072082	ENSMUSG00000049396	ENSMUSG00000029505
ENSMUSG00000031813	ENSMUSG00000022364	ENSMUSG00000032288	ENSMUSG00000023176	ENSMUSG00000018428	ENSMUSG00000078941	ENSMUSG00000027104
ENSMUSG00000070493	ENSMUSG00000020453	ENSMUSG00000028029	ENSMUSG00000062012	ENSMUSG00000028890	ENSMUSG00000005566	ENSMUSG00000038374
ENSMUSG00000002372	ENSMUSG00000031568	ENSMUSG00000047126	ENSMUSG00000022525	ENSMUSG00000022680	miRBase:MI0008316	ENSMUSG00000020366
ENSMUSG00000001542	ENSMUSG00000032058	ENSMUSG00000018570	ENSMUSG00000021807	ENSMUSG00000024427	ENSMUSG00000075395	ENSMUSG00000048772
ENSMUSG00000035378	ENSMUSG00000055200	ENSMUSG00000019943	ENSMUSG00000033589	ENSMUSG00000057738	ENSMUSG00000024589	ENSMUSG00000032376
ENSMUSG00000033581	ENSMUSG00000032180	ENSMUSG00000003269	ENSMUSG00000022283	ENSMUSG00000021754	ENSMUSG00000019790	ENSMUSG00000030534
ENSMUSG00000032320	ENSMUSG00000030096	ENSMUSG00000021477	ENSMUSG00000073722	ENSMUSG00000022865	ENSMUSG00000029840	ENSMUSG00000018196
ENSMUSG00000075419	ENSMUSG00000040998	ENSMUSG00000060679	ENSMUSG00000028164	ENSMUSG00000026620	ENSMUSG00000022476	ENSMUSG00000067543
ENSMUSG00000033773	ENSMUSG00000071359	ENSMUSG00000001687	ENSMUSG00000021224	ENSMUSG00000025915	ENSMUSG00000024583	ENSMUSG00000026662
ENSMUSG00000027109	ENSMUSG00000035078	ENSMUSG00000031736	ENSMUSG00000062175	ENSMUSG00000050530	ENSMUSG00000037134	ENSMUSG00000051375
ENSMUSG00000007659	ENSMUSG00000046959	ENSMUSG00000028960	ENSMUSG00000028878	ENSMUSG00000025332	ENSMUSG00000038412	ENSMUSG00000020831
ENSMUSG00000040712	ENSMUSG00000026812	ENSMUSG00000022390	ENSMUSG00000073725	ENSMUSG00000025245	ENSMUSG00000016520	ENSMUSG00000029547
ENSMUSG00000027356	ENSMUSG00000028274	ENSMUSG00000024487	ENSMUSG00000022817	ENSMUSG00000019988	ENSMUSG00000038538	ENSMUSG00000027510
ENSMUSG00000034518	ENSMUSG00000035310	ENSMUSG00000039115	ENSMUSG00000024974	ENSMUSG00000046994	ENSMUSG00000028811	ENSMUSG00000032020
ENSMUSG00000030316	ENSMUSG00000004591	ENSMUSG00000051169	ENSMUSG00000094870	ENSMUSG00000028403	ENSMUSG00000032232	ENSMUSG00000026994
ENSMUSG00000024858	ENSMUSG00000086191	ENSMUSG00000038774	ENSMUSG00000030768	ENSMUSG00000020857	miRBase:MI0000248	ENSMUSG00000069094
ENSMUSG00000048546	ENSMUSG00000000934	ENSMUSG00000032612	ENSMUSG00000026944	ENSMUSG00000044433	ENSMUSG00000039145	ENSMUSG00000048170
ENSMUSG00000015829	ENSMUSG00000036104	ENSMUSG00000016319	ENSMUSG00000037822	ENSMUSG00000040850	ENSMUSG00000035683	ENSMUSG00000049815
ENSMUSG00000039198	ENSMUSG00000026174	ENSMUSG00000033423	ENSMUSG00000033047	ENSMUSG00000000439	ENSMUSG00000030876	ENSMUSG00000040857
ENSMUSG00000056367	ENSMUSG00000024790	ENSMUSG00000033712	ENSMUSG00000021981	ENSMUSG00000030257	ENSMUSG00000003178	ENSMUSG00000060371
ENSMUSG00000069539	ENSMUSG00000002455	ENSMUSG00000041890	ENSMUSG00000035311	ENSMUSG00000035828	ENSMUSG00000019907	ENSMUSG00000036323
ENSMUSG00000024293	ENSMUSG00000037720	ENSMUSG00000001415	ENSMUSG00000026425	ENSMUSG00000032405	ENSMUSG00000025423	ENSMUSG00000016257
ENSMUSG00000086015	ENSMUSG00000006740	ENSMUSG00000047030	ENSMUSG00000038037	ENSMUSG00000029462	ENSMUSG00000029552	ENSMUSG00000086923
ENSMUSG00000029166	ENSMUSG00000020282	ENSMUSG00000039662	ENSMUSG00000035890	ENSMUSG00000017631	ENSMUSG00000023961	ENSMUSG00000019189
ENSMUSG00000002814	ENSMUSG00000046101	ENSMUSG00000053553	ENSMUSG00000052296	ENSMUSG00000038187	ENSMUSG00000078249	ENSMUSG00000068221
ENSMUSG00000042594	ENSMUSG00000004460	ENSMUSG00000022808	ENSMUSG00000007029	ENSMUSG00000013663	ENSMUSG00000022951	ENSMUSG00000051335
ENSMUSG00000058979	ENSMUSG00000020612	ENSMUSG00000017176	ENSMUSG00000058407	ENSMUSG00000092048	ENSMUSG00000097318	ENSMUSG00000026641
ENSMUSG00000035572	ENSMUSG00000026842	ENSMUSG00000016510	ENSMUSG00000022214	ENSMUSG00000026341	ENSMUSG00000032783	ENSMUSG00000063450
ENSMUSG00000026605	ENSMUSG00000062760	ENSMUSG00000073684	ENSMUSG00000022414	ENSMUSG00000063952	ENSMUSG00000038178	ENSMUSG00000034645
ENSMUSG00000021832	ENSMUSG00000027195	ENSMUSG00000098132	ENSMUSG00000033083	ENSMUSG00000038759	ENSMUSG00000025875	ENSMUSG00000034254
ENSMUSG00000039883	ENSMUSG00000033088	ENSMUSG00000035722	ENSMUSG00000037896	ENSMUSG00000030042	ENSMUSG00000025978	ENSMUSG00000005069
ENSMUSG00000040040	ENSMUSG00000029670	ENSMUSG00000069114	ENSMUSG00000050382	ENSMUSG00000015812	ENSMUSG00000053470	ENSMUSG00000053141
ENSMUSG00000039275	ENSMUSG00000049339	ENSMUSG00000034449	ENSMUSG00000054321	ENSMUSG00000005262	ENSMUSG00000026727	ENSMUSG00000071533
ENSMUSG00000038014	ENSMUSG00000042406	ENSMUSG00000071644	ENSMUSG00000020775	ENSMUSG00000029036	ENSMUSG00000023846	ENSMUSG00000025982
ENSMUSG00000034926	ENSMUSG00000073664	ENSMUSG00000031971	ENSMUSG00000020914	ENSMUSG00000015023	ENSMUSG00000085122	ENSMUSG00000038365
ENSMUSG00000026005	ENSMUSG00000020547	ENSMUSG00000020964	ENSMUSG00000072889	ENSMUSG00000022203	ENSMUSG00000047714	ENSMUSG00000022797
ENSMUSG00000045140	ENSMUSG00000062078	ENSMUSG00000061559	ENSMUSG00000042472	ENSMUSG00000030982	ENSMUSG00000056214	ENSMUSG00000025870
ENSMUSG00000001305	ENSMUSG00000026274	ENSMUSG00000030019	ENSMUSG00000022559	ENSMUSG00000020474	ENSMUSG00000038671	ENSMUSG00000021660
ENSMUSG00000020290	ENSMUSG00000033379	ENSMUSG00000029911	ENSMUSG00000021595	ENSMUSG00000031697	ENSMUSG00000014294	ENSMUSG00000071064
ENSMUSG00000035293	ENSMUSG00000041712	ENSMUSG00000027566	ENSMUSG00000028282	ENSMUSG00000059005	ENSMUSG00000025782	ENSMUSG00000061477
ENSMUSG00000074513	ENSMUSG00000003135	ENSMUSG00000098234	ENSMUSG00000003923	ENSMUSG00000021311	ENSMUSG00000002949	ENSMUSG00000026618
ENSMUSG00000014355	ENSMUSG00000027018	ENSMUSG00000028309	ENSMUSG00000080242	ENSMUSG00000024472	ENSMUSG00000040661	ENSMUSG00000020790
ENSMUSG00000046139	ENSMUSG00000029863	ENSMUSG00000070420	ENSMUSG00000005667	ENSMUSG00000002393	ENSMUSG00000040383	ENSMUSG00000049422
ENSMUSG00000028478	ENSMUSG00000060743	ENSMUSG00000021189	ENSMUSG00000028106	ENSMUSG00000060152	ENSMUSG00000019297	ENSMUSG00000032299
ENSMUSG00000004099	ENSMUSG00000029536	ENSMUSG00000004936	ENSMUSG00000006307	ENSMUSG00000048039	ENSMUSG00000051403	ENSMUSG00000028869
ENSMUSG00000078931	ENSMUSG00000027984	ENSMUSG00000074182	ENSMUSG00000040028	ENSMUSG00000000282	ENSMUSG00000039501	ENSMUSG00000074469
ENSMUSG00000032295	ENSMUSG00000021413	ENSMUSG00000033706	ENSMUSG00000071074	ENSMUSG00000028030	ENSMUSG00000028975	ENSMUSG00000022761
ENSMUSG00000032419	ENSMUSG00000043659	ENSMUSG00000069911	ENSMUSG00000041632	ENSMUSG00000047824	ENSMUSG00000022257	ENSMUSG00000042369
ENSMUSG00000020171	ENSMUSG00000022209	ENSMUSG00000050088	ENSMUSG00000097003	ENSMUSG00000031918	ENSMUSG00000033653	ENSMUSG00000027722
ENSMUSG00000024614	ENSMUSG00000048249	ENSMUSG00000049336	ENSMUSG00000031488	ENSMUSG00000029385	ENSMUSG00000040321	ENSMUSG00000014353
ENSMUSG00000056851	ENSMUSG00000026748	ENSMUSG00000026127	ENSMUSG00000024740	ENSMUSG00000029433	ENSMUSG00000037487	ENSMUSG00000020671
ENSMUSG00000023170	ENSMUSG00000043140	ENSMUSG00000027613	ENSMUSG00000030980	ENSMUSG00000028397	ENSMUSG00000046295	ENSMUSG00000049751
ENSMUSG00000020456	ENSMUSG00000060862	ENSMUSG00000029060	ENSMUSG00000006392	ENSMUSG00000079215	ENSMUSG00000024251	ENSMUSG00000040274
ENSMUSG00000046792	ENSMUSG00000020738	ENSMUSG00000021696	ENSMUSG00000027405	ENSMUSG00000036478	ENSMUSG00000037351	ENSMUSG00000075376
ENSMUSG00000040048	ENSMUSG00000015341	ENSMUSG00000031774	ENSMUSG00000026276	ENSMUSG00000055240	ENSMUSG00000019478	ENSMUSG00000002102
ENSMUSG00000028998	ENSMUSG00000037938	ENSMUSG00000029064	ENSMUSG00000019179	ENSMUSG00000054808	ENSMUSG00000032553	ENSMUSG00000026240
ENSMUSG00000050213	ENSMUSG00000022404	ENSMUSG00000018446	ENSMUSG00000005481	ENSMUSG00000045767	ENSMUSG00000024659	ENSMUSG00000026004
ENSMUSG00000066392	ENSMUSG00000066900	ENSMUSG00000029004	ENSMUSG00000019139	ENSMUSG00000036442	ENSMUSG00000031783	ENSMUSG00000022314
ENSMUSG00000028433	ENSMUSG00000006673	ENSMUSG00000042599	ENSMUSG00000020692	ENSMUSG00000040177	ENSMUSG00000026887	ENSMUSG00000036992
ENSMUSG00000000804	ENSMUSG00000021969	ENSMUSG00000021901	ENSMUSG00000035382	ENSMUSG00000030512	ENSMUSG00000014932	ENSMUSG00000060708
ENSMUSG00000025157	ENSMUSG00000073676	ENSMUSG00000031644	ENSMUSG00000004070	ENSMUSG00000028383	ENSMUSG00000063894	ENSMUSG00000030868
ENSMUSG00000021482	ENSMUSG00000071203	ENSMUSG00000037257	ENSMUSG00000021497	ENSMUSG00000041954	ENSMUSG00000022299	ENSMUSG00000073775
ENSMUSG00000057715	ENSMUSG00000029179	ENSMUSG00000014668	ENSMUSG00000041859	ENSMUSG00000022000	ENSMUSG00000046010	ENSMUSG00000038975
ENSMUSG00000032293	ENSMUSG00000090553	ENSMUSG00000031984	ENSMUSG00000017999	ENSMUSG00000058835	ENSMUSG00000020929	ENSMUSG00000032604
ENSMUSG00000022811	ENSMUSG00000021374	ENSMUSG00000014771	ENSMUSG00000002871	ENSMUSG00000032480	ENSMUSG00000032469	ENSMUSG00000002948
ENSMUSG00000069089	ENSMUSG00000020167	ENSMUSG00000033862	ENSMUSG00000028212	ENSMUSG00000019214	ENSMUSG00000002279	ENSMUSG00000020116
ENSMUSG00000042608	ENSMUSG00000042797	ENSMUSG00000025869	ENSMUSG00000031386	ENSMUSG00000052302	ENSMUSG00000041801	ENSMUSG00000041997
ENSMUSG00000025758	ENSMUSG00000000823	ENSMUSG00000039615	ENSMUSG00000011158	ENSMUSG00000025198	ENSMUSG00000034484	ENSMUSG00000021033
ENSMUSG00000079260	ENSMUSG00000006941	ENSMUSG00000033216	ENSMUSG00000036568	ENSMUSG00000015312	ENSMUSG00000053617	ENSMUSG00000061130
ENSMUSG00000071640	ENSMUSG00000052459	ENSMUSG00000060935	ENSMUSG00000039109	ENSMUSG00000026926	ENSMUSG00000049791	ENSMUSG00000024902
ENSMUSG00000020648	ENSMUSG00000027014	ENSMUSG00000045257	ENSMUSG00000091625	ENSMUSG00000038398	ENSMUSG00000040549	ENSMUSG00000032463
ENSMUSG00000026509	ENSMUSG00000026469	ENSMUSG00000020806	ENSMUSG00000092564	ENSMUSG00000030846	ENSMUSG00000098022	ENSMUSG00000027937
ENSMUSG00000034160	ENSMUSG00000030641	ENSMUSG00000027397	ENSMUSG00000057322	ENSMUSG00000064437	ENSMUSG00000097915	ENSMUSG00000020074
ENSMUSG00000001440	ENSMUSG00000057156	ENSMUSG00000064326	ENSMUSG00000006262	ENSMUSG00000035401	ENSMUSG00000040029	ENSMUSG00000024404
ENSMUSG00000011267	ENSMUSG00000020869	ENSMUSG00000032387	ENSMUSG00000025234	ENSMUSG00000040550	ENSMUSG00000031983	ENSMUSG00000047583
ENSMUSG00000026439	ENSMUSG00000029196	ENSMUSG00000049971	ENSMUSG00000028851	ENSMUSG00000024785	ENSMUSG00000059182	ENSMUSG00000066235
ENSMUSG00000048277	ENSMUSG00000024007	ENSMUSG00000026289	ENSMUSG00000034412	ENSMUSG00000034807	ENSMUSG00000017686	ENSMUSG00000026277
ENSMUSG00000066042	ENSMUSG00000073700	ENSMUSG00000021890	ENSMUSG00000020430	ENSMUSG00000057541	ENSMUSG00000023175	ENSMUSG00000036086
ENSMUSG00000005204	ENSMUSG00000029521	ENSMUSG00000025858	ENSMUSG00000058997	ENSMUSG00000020022	ENSMUSG00000055128	ENSMUSG00000085912
ENSMUSG00000031826	ENSMUSG00000067995	ENSMUSG00000030685	ENSMUSG00000030075	ENSMUSG00000029178	ENSMUSG00000027340	ENSMUSG00000032253
ENSMUSG00000025358	ENSMUSG00000001751	ENSMUSG00000038525	ENSMUSG00000055409	ENSMUSG00000039377	ENSMUSG00000049686	ENSMUSG00000054871
ENSMUSG00000039585	ENSMUSG00000021156	ENSMUSG00000032936	ENSMUSG00000026587	ENSMUSG00000055239	ENSMUSG00000053080	ENSMUSG00000036867
ENSMUSG00000044496	ENSMUSG00000024855	ENSMUSG00000028476	ENSMUSG00000041992	ENSMUSG00000000555	ENSMUSG00000033396	ENSMUSG00000027652
ENSMUSG00000062421	ENSMUSG00000028333	ENSMUSG00000027889	ENSMUSG00000039474	ENSMUSG00000032373	ENSMUSG00000028540	ENSMUSG00000021103
miRBase:MI0000714	ENSMUSG00000022307	ENSMUSG00000028412	ENSMUSG00000054477	ENSMUSG00000021737	ENSMUSG00000032215	ENSMUSG00000087009
ENSMUSG00000032570	ENSMUSG00000028009	ENSMUSG00000028709	ENSMUSG00000034636	ENSMUSG00000035798	ENSMUSG00000056536	ENSMUSG00000014349
ENSMUSG00000024566	ENSMUSG00000022031	ENSMUSG00000027569	ENSMUSG00000022838	ENSMUSG00000027315	ENSMUSG00000031990	ENSMUSG00000021728
ENSMUSG00000060402	ENSMUSG00000023964	ENSMUSG00000047459	ENSMUSG00000042851	ENSMUSG00000022892	ENSMUSG00000001847	ENSMUSG00000037905
ENSMUSG00000003623	ENSMUSG00000024803	ENSMUSG00000051367	ENSMUSG00000048920	ENSMUSG00000036875	ENSMUSG00000018377	ENSMUSG00000048285
ENSMUSG00000090919	ENSMUSG00000026707	ENSMUSG00000026749	ENSMUSG00000015337	ENSMUSG00000052712	ENSMUSG00000037887	ENSMUSG00000033392
ENSMUSG00000020099	ENSMUSG00000014980	ENSMUSG00000039813	ENSMUSG00000024294	ENSMUSG00000025040	ENSMUSG00000042650	ENSMUSG00000013236
ENSMUSG00000015714	ENSMUSG00000060843	ENSMUSG00000029005	ENSMUSG00000002068	ENSMUSG00000081683	ENSMUSG00000022610	ENSMUSG00000034462
ENSMUSG00000022109	ENSMUSG00000042978	ENSMUSG00000041650	ENSMUSG00000097350	ENSMUSG00000029158	ENSMUSG00000021639	ENSMUSG00000018581
ENSMUSG00000026082	ENSMUSG00000051154	ENSMUSG00000068523	ENSMUSG00000028779	ENSMUSG00000058239	ENSMUSG00000053965	ENSMUSG00000069237
ENSMUSG00000032735	ENSMUSG00000021215	ENSMUSG00000022051	ENSMUSG00000091811	ENSMUSG00000070738	ENSMUSG00000023067	ENSMUSG00000069495
ENSMUSG00000055694	ENSMUSG00000028059	ENSMUSG00000037622	ENSMUSG00000031792	ENSMUSG00000061666	ENSMUSG00000033295	ENSMUSG00000029253
ENSMUSG00000024271	ENSMUSG00000039262	ENSMUSG00000079608	ENSMUSG00000047466	ENSMUSG00000087478	ENSMUSG00000026339	ENSMUSG00000030447
ENSMUSG00000037935	ENSMUSG00000032534	ENSMUSG00000055003	ENSMUSG00000039831	ENSMUSG00000097276	ENSMUSG00000021025	ENSMUSG00000038301
ENSMUSG00000027641	ENSMUSG00000085438	ENSMUSG00000037762	ENSMUSG00000027878	ENSMUSG00000002028	ENSMUSG00000064288	ENSMUSG00000073051
ENSMUSG00000041642	ENSMUSG00000066979	ENSMUSG00000085631	ENSMUSG00000067071	ENSMUSG00000087104	ENSMUSG00000030852	ENSMUSG00000052763
ENSMUSG00000014039	ENSMUSG00000025374	ENSMUSG00000093551	ENSMUSG00000089917	ENSMUSG00000024683	ENSMUSG00000021338	ENSMUSG00000061665
ENSMUSG00000078566	ENSMUSG00000039205	ENSMUSG00000034333	ENSMUSG00000053747	ENSMUSG00000039100	ENSMUSG00000024913	ENSMUSG00000024067
ENSMUSG00000056917	ENSMUSG00000033671	ENSMUSG00000020721	ENSMUSG00000074916	ENSMUSG00000025224	ENSMUSG00000024560	ENSMUSG00000025340
ENSMUSG00000040195	miRBase:MI0000138	ENSMUSG00000028756	ENSMUSG00000020594	ENSMUSG00000021840	ENSMUSG00000053253	ENSMUSG00000086999
ENSMUSG00000051146	ENSMUSG00000026991	ENSMUSG00000028641	ENSMUSG00000079144	ENSMUSG00000056758	miRBase:MI0018028	ENSMUSG00000028443
ENSMUSG00000028470	ENSMUSG00000031775	ENSMUSG00000030849	ENSMUSG00000071176	ENSMUSG00000025060	ENSMUSG00000041375	ENSMUSG00000022464
ENSMUSG00000038371	ENSMUSG00000027175	ENSMUSG00000038170	ENSMUSG00000038160	ENSMUSG00000034723	ENSMUSG00000038180	ENSMUSG00000032249
ENSMUSG00000048482	ENSMUSG00000019437	ENSMUSG00000022807	ENSMUSG00000023025	ENSMUSG00000037926	ENSMUSG00000028107	ENSMUSG00000032727
ENSMUSG00000033849	ENSMUSG00000027377	ENSMUSG00000032598	ENSMUSG00000027048	ENSMUSG00000024191	ENSMUSG00000041915	ENSMUSG00000001761
ENSMUSG00000037149	ENSMUSG00000049657	ENSMUSG00000022359	ENSMUSG00000087022	ENSMUSG00000040482	ENSMUSG00000002803	ENSMUSG00000039033
ENSMUSG00000048480	ENSMUSG00000056770	ENSMUSG00000073643	ENSMUSG00000005103	ENSMUSG00000054434	ENSMUSG00000056947	ENSMUSG00000009621
ENSMUSG00000023277	ENSMUSG00000057060	ENSMUSG00000025646	miRBase:MI0018022	ENSMUSG00000064061	ENSMUSG00000055560	ENSMUSG00000002767
ENSMUSG00000025154	ENSMUSG00000020089	ENSMUSG00000055373	ENSMUSG00000039735	ENSMUSG00000029624	ENSMUSG00000026491	ENSMUSG00000024983
ENSMUSG00000085876	ENSMUSG00000037443	ENSMUSG00000036860	ENSMUSG00000027550	ENSMUSG00000021731	ENSMUSG00000006676	ENSMUSG00000028692
ENSMUSG00000001062	ENSMUSG00000063253	ENSMUSG00000006763	ENSMUSG00000032475	ENSMUSG00000036968	ENSMUSG00000063171	ENSMUSG00000058006
ENSMUSG00000014769	ENSMUSG00000053838	ENSMUSG00000020537	ENSMUSG00000075043	ENSMUSG00000035202	ENSMUSG00000041341	ENSMUSG00000039220
ENSMUSG00000031546	ENSMUSG00000040021	ENSMUSG00000001157	ENSMUSG00000028419	ENSMUSG00000033952	ENSMUSG00000022112	ENSMUSG00000044068
ENSMUSG00000022351	ENSMUSG00000019838	ENSMUSG00000060227	ENSMUSG00000027365	ENSMUSG00000021671	ENSMUSG00000029920	ENSMUSG00000018209
ENSMUSG00000041057	ENSMUSG00000020571	miRBase:MI0009952	ENSMUSG00000056076	ENSMUSG00000058046	ENSMUSG00000025785	ENSMUSG00000041491
ENSMUSG00000029777	ENSMUSG00000025153	ENSMUSG00000005410	ENSMUSG00000026701	ENSMUSG00000060636	ENSMUSG00000092203	ENSMUSG00000028582
ENSMUSG00000029614	ENSMUSG00000025508	ENSMUSG00000041841	ENSMUSG00000005687	ENSMUSG00000034224	ENSMUSG00000031701	ENSMUSG00000032078
ENSMUSG00000004771	ENSMUSG00000039458	ENSMUSG00000028821	ENSMUSG00000028527	ENSMUSG00000020936	ENSMUSG00000029136	ENSMUSG00000041560
ENSMUSG00000015932	ENSMUSG00000018160	ENSMUSG00000019689	ENSMUSG00000002608	ENSMUSG00000031591	ENSMUSG00000039361	ENSMUSG00000091931
ENSMUSG00000038803	ENSMUSG00000028300	ENSMUSG00000039086	ENSMUSG00000067847	ENSMUSG00000017843	ENSMUSG00000028099	ENSMUSG00000028251
ENSMUSG00000006315	ENSMUSG00000019173	ENSMUSG00000037296	ENSMUSG00000023988	ENSMUSG00000026047	ENSMUSG00000031879	ENSMUSG00000031511
ENSMUSG00000037643	ENSMUSG00000038894	ENSMUSG00000026500	ENSMUSG00000051451	ENSMUSG00000029623	ENSMUSG00000030279	ENSMUSG00000074024
ENSMUSG00000003873	ENSMUSG00000059486	ENSMUSG00000073208	ENSMUSG00000027333	ENSMUSG00000020483	ENSMUSG00000049401	ENSMUSG00000039738
ENSMUSG00000037808	ENSMUSG00000040455	ENSMUSG00000025907	ENSMUSG00000033769	ENSMUSG00000005625	ENSMUSG00000027091	ENSMUSG00000038235
ENSMUSG00000027163	ENSMUSG00000046351	miRBase:MI0018014	ENSMUSG00000045327	ENSMUSG00000052798	ENSMUSG00000030120	ENSMUSG00000020386
ENSMUSG00000024104	ENSMUSG00000036955	ENSMUSG00000041406	ENSMUSG00000036777	ENSMUSG00000031532	ENSMUSG00000003814	ENSMUSG00000039254
ENSMUSG00000037759	ENSMUSG00000031922	ENSMUSG00000004937	ENSMUSG00000012443	ENSMUSG00000068394	ENSMUSG00000034574	ENSMUSG00000015087
ENSMUSG00000097180	ENSMUSG00000053411	ENSMUSG00000026895	ENSMUSG00000022403	ENSMUSG00000027304	ENSMUSG00000031938	ENSMUSG00000037253
ENSMUSG00000032046	ENSMUSG00000025027	ENSMUSG00000067430	ENSMUSG00000033554	ENSMUSG00000075528	ENSMUSG00000030751	ENSMUSG00000032582
ENSMUSG00000000743	ENSMUSG00000021645	ENSMUSG00000037570	ENSMUSG00000025823	ENSMUSG00000008373	ENSMUSG00000013646	ENSMUSG00000031691
ENSMUSG00000090841	ENSMUSG00000035392	ENSMUSG00000025474	ENSMUSG00000022999	ENSMUSG00000028273	ENSMUSG00000032640	ENSMUSG00000008393
ENSMUSG00000063320	ENSMUSG00000038302	ENSMUSG00000023915	ENSMUSG00000028636	ENSMUSG00000023832	ENSMUSG00000038311	ENSMUSG00000046201
ENSMUSG00000038250	ENSMUSG00000048402	ENSMUSG00000031647	ENSMUSG00000040010	ENSMUSG00000035505	ENSMUSG00000019814	ENSMUSG00000024383
ENSMUSG00000034610	ENSMUSG00000046404	ENSMUSG00000023330	ENSMUSG00000022400	ENSMUSG00000035674	ENSMUSG00000036223	ENSMUSG00000069565
ENSMUSG00000026750	ENSMUSG00000085741	ENSMUSG00000021258	ENSMUSG00000029729	ENSMUSG00000007589	ENSMUSG00000026811	ENSMUSG00000016554
ENSMUSG00000045193	ENSMUSG00000047221	ENSMUSG00000087341	ENSMUSG00000038708	ENSMUSG00000026558	ENSMUSG00000042487	ENSMUSG00000035958
ENSMUSG00000052406	ENSMUSG00000038697	ENSMUSG00000062510	ENSMUSG00000005233	ENSMUSG00000097407	ENSMUSG00000075040	ENSMUSG00000071654
ENSMUSG00000039771	ENSMUSG00000048218	ENSMUSG00000027075	ENSMUSG00000031796	ENSMUSG00000039637	ENSMUSG00000021916	ENSMUSG00000027070
ENSMUSG00000057963	ENSMUSG00000013465	ENSMUSG00000047495	ENSMUSG00000028868	ENSMUSG00000013701	ENSMUSG00000090125	ENSMUSG00000037001
ENSMUSG00000034781	ENSMUSG00000039620	ENSMUSG00000026273	ENSMUSG00000020075	ENSMUSG00000030884	ENSMUSG00000062822	ENSMUSG00000039048
ENSMUSG00000028884	ENSMUSG00000074781	ENSMUSG00000030528	ENSMUSG00000002660	ENSMUSG00000034285	ENSMUSG00000021486	ENSMUSG00000071646
ENSMUSG00000066880	ENSMUSG00000045128	ENSMUSG00000059208	ENSMUSG00000042506	ENSMUSG00000029144	ENSMUSG00000031816	ENSMUSG00000035297
ENSMUSG00000031631	ENSMUSG00000002844	ENSMUSG00000022160	ENSMUSG00000060181	ENSMUSG00000050604	ENSMUSG00000059273	ENSMUSG00000032308
ENSMUSG00000026121	ENSMUSG00000042589	ENSMUSG00000026475	ENSMUSG00000030779	ENSMUSG00000038002	ENSMUSG00000075000	ENSMUSG00000001280
ENSMUSG00000041870	ENSMUSG00000056749	ENSMUSG00000047866	ENSMUSG00000019370	ENSMUSG00000038677	ENSMUSG00000038637	ENSMUSG00000047264
ENSMUSG00000035696	ENSMUSG00000022526	ENSMUSG00000014496	ENSMUSG00000036639	ENSMUSG00000062929	ENSMUSG00000022337	ENSMUSG00000043183
ENSMUSG00000030045	ENSMUSG00000062995	ENSMUSG00000041966	ENSMUSG00000021488	ENSMUSG00000024713	ENSMUSG00000026880	ENSMUSG00000041598
ENSMUSG00000039450	ENSMUSG00000053841	ENSMUSG00000034656	ENSMUSG00000001380	ENSMUSG00000030946	ENSMUSG00000022788	miRBase:MI0021862
ENSMUSG00000017478	ENSMUSG00000060206	ENSMUSG00000020273	ENSMUSG00000038047	ENSMUSG00000025816	ENSMUSG00000037470	ENSMUSG00000036057
ENSMUSG00000030435	ENSMUSG00000025133	ENSMUSG00000003458	ENSMUSG00000062381	ENSMUSG00000097195	ENSMUSG00000020393	ENSMUSG00000000001
ENSMUSG00000019969	ENSMUSG00000015971	ENSMUSG00000033228	ENSMUSG00000037664	ENSMUSG00000028757	ENSMUSG00000078427	ENSMUSG00000042401
ENSMUSG00000055447	miRBase:MI0022894	ENSMUSG00000016344	ENSMUSG00000021917	ENSMUSG00000059363	ENSMUSG00000031562	ENSMUSG00000021061
ENSMUSG00000037400	ENSMUSG00000031353	ENSMUSG00000026603	ENSMUSG00000054499	ENSMUSG00000002221	ENSMUSG00000054793	ENSMUSG00000032314
ENSMUSG00000022466	ENSMUSG00000042524	ENSMUSG00000040936	ENSMUSG00000034265	ENSMUSG00000021420	ENSMUSG00000047098	ENSMUSG00000026743
ENSMUSG00000052727	ENSMUSG00000052135	ENSMUSG00000021144	ENSMUSG00000060397	ENSMUSG00000035992	ENSMUSG00000048495	ENSMUSG00000042203
ENSMUSG00000040209	ENSMUSG00000036123	ENSMUSG00000025958	ENSMUSG00000051864	ENSMUSG00000016487	ENSMUSG00000061689	ENSMUSG00000058325
ENSMUSG00000028542	ENSMUSG00000027130	ENSMUSG00000028556	ENSMUSG00000066278	ENSMUSG00000026305	ENSMUSG00000092192	ENSMUSG00000029461
ENSMUSG00000029346	ENSMUSG00000035376	ENSMUSG00000030499	ENSMUSG00000042453	ENSMUSG00000020003	ENSMUSG00000042606	ENSMUSG00000036632
ENSMUSG00000039633	ENSMUSG00000068267	ENSMUSG00000029672	ENSMUSG00000060301	ENSMUSG00000048661	ENSMUSG00000089633	ENSMUSG00000058587
ENSMUSG00000028832	ENSMUSG00000069910	ENSMUSG00000049807	ENSMUSG00000019942	ENSMUSG00000006731	ENSMUSG00000030309	ENSMUSG00000036053
ENSMUSG00000048251	ENSMUSG00000023861	ENSMUSG00000043336	ENSMUSG00000057469	ENSMUSG00000059280	ENSMUSG00000026083	ENSMUSG00000075284
ENSMUSG00000050627	ENSMUSG00000048720	ENSMUSG00000039232	ENSMUSG00000004383	ENSMUSG00000067860	ENSMUSG00000034292	ENSMUSG00000014867
ENSMUSG00000022961	ENSMUSG00000031930	ENSMUSG00000028437	ENSMUSG00000023018	ENSMUSG00000026670	ENSMUSG00000070923	ENSMUSG00000031220
ENSMUSG00000022617	ENSMUSG00000036815	ENSMUSG00000020697	ENSMUSG00000002059	ENSMUSG00000032479	ENSMUSG00000017288	ENSMUSG00000036644
ENSMUSG00000054920	ENSMUSG00000021710	ENSMUSG00000053693	ENSMUSG00000028393	ENSMUSG00000022724	ENSMUSG00000020733	ENSMUSG00000047604
ENSMUSG00000097493	ENSMUSG00000022452	ENSMUSG00000033701	ENSMUSG00000033871	ENSMUSG00000068407	ENSMUSG00000053950	ENSMUSG00000058351
ENSMUSG00000026434	ENSMUSG00000085416	ENSMUSG00000024892	ENSMUSG00000039555	ENSMUSG00000037513	ENSMUSG00000018796	ENSMUSG00000079562
ENSMUSG00000025857	ENSMUSG00000035093	ENSMUSG00000040722	ENSMUSG00000005621	ENSMUSG00000031489	ENSMUSG00000041741	ENSMUSG00000024544
ENSMUSG00000033542	ENSMUSG00000045211	ENSMUSG00000037712	ENSMUSG00000021929	ENSMUSG00000074405	ENSMUSG00000069729	ENSMUSG00000010607
ENSMUSG00000051502	ENSMUSG00000021846	ENSMUSG00000005897	ENSMUSG00000027346	ENSMUSG00000025413	ENSMUSG00000025795	ENSMUSG00000049551
ENSMUSG00000068740	ENSMUSG00000021112	ENSMUSG00000051306	ENSMUSG00000036529	ENSMUSG00000037960	ENSMUSG00000052949	ENSMUSG00000028163
ENSMUSG00000029128	ENSMUSG00000027993	ENSMUSG00000038733	ENSMUSG00000039105	ENSMUSG00000066043	ENSMUSG00000041354	ENSMUSG00000002058
ENSMUSG00000022940	ENSMUSG00000029101	ENSMUSG00000071653	ENSMUSG00000022508	ENSMUSG00000054716	ENSMUSG00000040631	ENSMUSG00000038496
ENSMUSG00000021460	ENSMUSG00000074575	ENSMUSG00000029171	ENSMUSG00000023307	ENSMUSG00000029125	ENSMUSG00000090113	ENSMUSG00000027649
ENSMUSG00000027366	ENSMUSG00000032872	ENSMUSG00000042303	ENSMUSG00000019777	ENSMUSG00000032324	ENSMUSG00000059842	ENSMUSG00000038145
ENSMUSG00000020380	ENSMUSG00000055371	ENSMUSG00000034850	ENSMUSG00000022211	ENSMUSG00000022105	ENSMUSG00000001419	ENSMUSG00000003166
ENSMUSG00000063931	ENSMUSG00000075070	ENSMUSG00000025577	ENSMUSG00000033960	ENSMUSG00000024598	ENSMUSG00000026698	ENSMUSG00000027932
ENSMUSG00000040651	ENSMUSG00000024370	ENSMUSG00000040506	ENSMUSG00000016308	ENSMUSG00000037846	ENSMUSG00000025932	ENSMUSG00000059900
ENSMUSG00000073730	ENSMUSG00000019256	ENSMUSG00000025128	ENSMUSG00000038456	ENSMUSG00000061132	ENSMUSG00000048410	ENSMUSG00000001034
ENSMUSG00000020905	ENSMUSG00000024283	ENSMUSG00000089998	ENSMUSG00000029401	ENSMUSG00000029638	ENSMUSG00000050700	ENSMUSG00000034663
miRBase:MI0010749	ENSMUSG00000003824	ENSMUSG00000021703	ENSMUSG00000034187	ENSMUSG00000046719	ENSMUSG00000050592	ENSMUSG00000097709
ENSMUSG00000024905	ENSMUSG00000027276	ENSMUSG00000029804	ENSMUSG00000030102	ENSMUSG00000034075	ENSMUSG00000034560	ENSMUSG00000041936
ENSMUSG00000037475	ENSMUSG00000035439	ENSMUSG00000028862	ENSMUSG00000050310	ENSMUSG00000020431	ENSMUSG00000048721	ENSMUSG00000030822
ENSMUSG00000079065	ENSMUSG00000085148	ENSMUSG00000028651	ENSMUSG00000053819	ENSMUSG00000030850	ENSMUSG00000043051	ENSMUSG00000021557
ENSMUSG00000006546	ENSMUSG00000022174	ENSMUSG00000048234	ENSMUSG00000071649	ENSMUSG00000024174	ENSMUSG00000006010	ENSMUSG00000068417
ENSMUSG00000037395	ENSMUSG00000022769	ENSMUSG00000036931	ENSMUSG00000075023	ENSMUSG00000002731	ENSMUSG00000031728	ENSMUSG00000045730
ENSMUSG00000015652	ENSMUSG00000021548	ENSMUSG00000071855	ENSMUSG00000031629	miRBase:MI0008328	ENSMUSG00000024462	ENSMUSG00000029701
ENSMUSG00000041733	ENSMUSG00000026248	ENSMUSG00000005354	ENSMUSG00000045176	ENSMUSG00000063077	ENSMUSG00000038482	ENSMUSG00000025651
ENSMUSG00000002658	ENSMUSG00000017291	ENSMUSG00000052102	ENSMUSG00000044005	ENSMUSG00000073910	miRBase:MI0000389	ENSMUSG00000027076
ENSMUSG00000026219	ENSMUSG00000027787	ENSMUSG00000032434	ENSMUSG00000032712	ENSMUSG00000025199	ENSMUSG00000021500	ENSMUSG00000059554
ENSMUSG00000020458	ENSMUSG00000037902	ENSMUSG00000096188	ENSMUSG00000005150	ENSMUSG00000028367	ENSMUSG00000027505	ENSMUSG00000097769
ENSMUSG00000036678	ENSMUSG00000059291	ENSMUSG00000038690	ENSMUSG00000032187	ENSMUSG00000021120	ENSMUSG00000008435	ENSMUSG00000002728
ENSMUSG00000032185	ENSMUSG00000023972	ENSMUSG00000002870	ENSMUSG00000074220	ENSMUSG00000024422	ENSMUSG00000028622	ENSMUSG00000001786
ENSMUSG00000004561	ENSMUSG00000042202	ENSMUSG00000068184	ENSMUSG00000021484	ENSMUSG00000041453	ENSMUSG00000019792	ENSMUSG00000001700
ENSMUSG00000078919	ENSMUSG00000065734	ENSMUSG00000098274	ENSMUSG00000024732	ENSMUSG00000057894	ENSMUSG00000021288	ENSMUSG00000001105
ENSMUSG00000022193	ENSMUSG00000061589	ENSMUSG00000014444	ENSMUSG00000020358	ENSMUSG00000011382	ENSMUSG00000048481	ENSMUSG00000034442
ENSMUSG00000006720	ENSMUSG00000019773	ENSMUSG00000075054	ENSMUSG00000001794	ENSMUSG00000028040	ENSMUSG00000020280	ENSMUSG00000031762
ENSMUSG00000022191	ENSMUSG00000016181	ENSMUSG00000021257	ENSMUSG00000020034	ENSMUSG00000053119	ENSMUSG00000061028	ENSMUSG00000028672
ENSMUSG00000000384	ENSMUSG00000008429	ENSMUSG00000042032	ENSMUSG00000022385	ENSMUSG00000032216	ENSMUSG00000018401	ENSMUSG00000013662
ENSMUSG00000024989	ENSMUSG00000034263	ENSMUSG00000021690	ENSMUSG00000021957	ENSMUSG00000042043	ENSMUSG00000027502	ENSMUSG00000005514
ENSMUSG00000019261	ENSMUSG00000028438	ENSMUSG00000039840	ENSMUSG00000017837	ENSMUSG00000026048	ENSMUSG00000020455	ENSMUSG00000021290
ENSMUSG00000067367	ENSMUSG00000021978	ENSMUSG00000028126	ENSMUSG00000030612	ENSMUSG00000024165	ENSMUSG00000053565	ENSMUSG00000028800
ENSMUSG00000033790	ENSMUSG00000038683	ENSMUSG00000038417	ENSMUSG00000078348	ENSMUSG00000022540	ENSMUSG00000062944	ENSMUSG00000063108
ENSMUSG00000011306	ENSMUSG00000028873	ENSMUSG00000031967	ENSMUSG00000038241	ENSMUSG00000046791	ENSMUSG00000054792	ENSMUSG00000027242
ENSMUSG00000058392	ENSMUSG00000018547	ENSMUSG00000026131	ENSMUSG00000037416	ENSMUSG00000026663	ENSMUSG00000046160	ENSMUSG00000024400
ENSMUSG00000071647	ENSMUSG00000032198	ENSMUSG00000020899	ENSMUSG00000059316	ENSMUSG00000063689	ENSMUSG00000000738	ENSMUSG00000003868
ENSMUSG00000068921	ENSMUSG00000005575	ENSMUSG00000038827	ENSMUSG00000032501	ENSMUSG00000022119	ENSMUSG00000042557	ENSMUSG00000045251
ENSMUSG00000001138	ENSMUSG00000038181	ENSMUSG00000004500	ENSMUSG00000063383	ENSMUSG00000020834	ENSMUSG00000024985	ENSMUSG00000029687
ENSMUSG00000027506	ENSMUSG00000064302	ENSMUSG00000036845	ENSMUSG00000053353	ENSMUSG00000037580	ENSMUSG00000026429	ENSMUSG00000040174
ENSMUSG00000026955	ENSMUSG00000037355	ENSMUSG00000053931	ENSMUSG00000030611	ENSMUSG00000079330	ENSMUSG00000022436	ENSMUSG00000013973
ENSMUSG00000020780	ENSMUSG00000036751	ENSMUSG00000078905	ENSMUSG00000060924	ENSMUSG00000034168	ENSMUSG00000024038	ENSMUSG00000033697
ENSMUSG00000027291	ENSMUSG00000035559	ENSMUSG00000013736	ENSMUSG00000025158	ENSMUSG00000021794	ENSMUSG00000075227	ENSMUSG00000034274
ENSMUSG00000029397	ENSMUSG00000018932	ENSMUSG00000063531	ENSMUSG00000066406	ENSMUSG00000000751	ENSMUSG00000025995	ENSMUSG00000023940
ENSMUSG00000026622	ENSMUSG00000004667	ENSMUSG00000006398	ENSMUSG00000033577	ENSMUSG00000024587	ENSMUSG00000028322	ENSMUSG00000029066
ENSMUSG00000021938	ENSMUSG00000014592	ENSMUSG00000048878	ENSMUSG00000033253	ENSMUSG00000072235	ENSMUSG00000040820	ENSMUSG00000073436
ENSMUSG00000030034	ENSMUSG00000034902	ENSMUSG00000022070	ENSMUSG00000029992	ENSMUSG00000045273	ENSMUSG00000037750	ENSMUSG00000090290
ENSMUSG00000032913	ENSMUSG00000030835	ENSMUSG00000001521	ENSMUSG00000005779	ENSMUSG00000041570	ENSMUSG00000027678	ENSMUSG00000001783
ENSMUSG00000039704	ENSMUSG00000030942	ENSMUSG00000045414	ENSMUSG00000029145	ENSMUSG00000037461	ENSMUSG00000025050	ENSMUSG00000018669
ENSMUSG00000028964	ENSMUSG00000029016	ENSMUSG00000079658	ENSMUSG00000030058	ENSMUSG00000028850	ENSMUSG00000044968	ENSMUSG00000078256
ENSMUSG00000022574	ENSMUSG00000027860	ENSMUSG00000037239	ENSMUSG00000028426	ENSMUSG00000025979	ENSMUSG00000053768	ENSMUSG00000020152
ENSMUSG00000055760	ENSMUSG00000034839	ENSMUSG00000040127	ENSMUSG00000022844	ENSMUSG00000029312	ENSMUSG00000027488	ENSMUSG00000031996
ENSMUSG00000030177	ENSMUSG00000028763	ENSMUSG00000028538	ENSMUSG00000020524	ENSMUSG00000024132	ENSMUSG00000030180	ENSMUSG00000084866
ENSMUSG00000027575	ENSMUSG00000039000	ENSMUSG00000043857	ENSMUSG00000022490	ENSMUSG00000033520	ENSMUSG00000034432	ENSMUSG00000022779
ENSMUSG00000028414	ENSMUSG00000022427	ENSMUSG00000029587	ENSMUSG00000027406	ENSMUSG00000043587	ENSMUSG00000022234	ENSMUSG00000018733
ENSMUSG00000030775	ENSMUSG00000028669	ENSMUSG00000007476	ENSMUSG00000029815	ENSMUSG00000044349	ENSMUSG00000059796	ENSMUSG00000097772
ENSMUSG00000071662	ENSMUSG00000022422	ENSMUSG00000075033	ENSMUSG00000014301	ENSMUSG00000032342	ENSMUSG00000028576	ENSMUSG00000073633
ENSMUSG00000033940	ENSMUSG00000037525	ENSMUSG00000019362	ENSMUSG00000031487	ENSMUSG00000027108	ENSMUSG00000037965	ENSMUSG00000033106
ENSMUSG00000020472	ENSMUSG00000021945	ENSMUSG00000017550	ENSMUSG00000027425	ENSMUSG00000065954	ENSMUSG00000003581	ENSMUSG00000049658
ENSMUSG00000024906	ENSMUSG00000091537	ENSMUSG00000056211	ENSMUSG00000056305	ENSMUSG00000039660	ENSMUSG00000023004	ENSMUSG00000097487
ENSMUSG00000029048	ENSMUSG00000035372	ENSMUSG00000009863	ENSMUSG00000026520	ENSMUSG00000062937	ENSMUSG00000001435	ENSMUSG00000005089
ENSMUSG00000074580	ENSMUSG00000031732	ENSMUSG00000020601	ENSMUSG00000024976	ENSMUSG00000029550	ENSMUSG00000045275	ENSMUSG00000039414
ENSMUSG00000071537	ENSMUSG00000034220	ENSMUSG00000056429	ENSMUSG00000034430	ENSMUSG00000004788	ENSMUSG00000041872	ENSMUSG00000028957
ENSMUSG00000027806	ENSMUSG00000021140	ENSMUSG00000022890	ENSMUSG00000062991	ENSMUSG00000021318	ENSMUSG00000029209	ENSMUSG00000046658
ENSMUSG00000063239	ENSMUSG00000048899	ENSMUSG00000040479	ENSMUSG00000006732	ENSMUSG00000042734	ENSMUSG00000071014	ENSMUSG00000034111
ENSMUSG00000029781	ENSMUSG00000043510	ENSMUSG00000024712	ENSMUSG00000022702	ENSMUSG00000072501	ENSMUSG00000033933	ENSMUSG00000021775
ENSMUSG00000023272	ENSMUSG00000029088	ENSMUSG00000022253	ENSMUSG00000037710	ENSMUSG00000005804	ENSMUSG00000021552	ENSMUSG00000001891
ENSMUSG00000015335	ENSMUSG00000026103	ENSMUSG00000030259	ENSMUSG00000020102	ENSMUSG00000081824	ENSMUSG00000045039	ENSMUSG00000028413
ENSMUSG00000062519	ENSMUSG00000039328	ENSMUSG00000029621	ENSMUSG00000029135	ENSMUSG00000040761	ENSMUSG00000036052	ENSMUSG00000035469
ENSMUSG00000040373	ENSMUSG00000038729	ENSMUSG00000003131	ENSMUSG00000024457	ENSMUSG00000042444	ENSMUSG00000056043	ENSMUSG00000045817
ENSMUSG00000066586	ENSMUSG00000027479	ENSMUSG00000031642	ENSMUSG00000036819	ENSMUSG00000030861	ENSMUSG00000004931	ENSMUSG00000049504
ENSMUSG00000068040	ENSMUSG00000055013	ENSMUSG00000036461	ENSMUSG00000039967	ENSMUSG00000053049	ENSMUSG00000025078	ENSMUSG00000026849
ENSMUSG00000019779	ENSMUSG00000054752	ENSMUSG00000026393	ENSMUSG00000042029	ENSMUSG00000045333	ENSMUSG00000063142	ENSMUSG00000035621
ENSMUSG00000064284	ENSMUSG00000030505	ENSMUSG00000032305	ENSMUSG00000024182	ENSMUSG00000071749	ENSMUSG00000038437	ENSMUSG00000068205
ENSMUSG00000048138	ENSMUSG00000038205	ENSMUSG00000050174	ENSMUSG00000047940	ENSMUSG00000037306	ENSMUSG00000033502	ENSMUSG00000066456
ENSMUSG00000025981	ENSMUSG00000028635	ENSMUSG00000032050	ENSMUSG00000005580	ENSMUSG00000028423	ENSMUSG00000038212	ENSMUSG00000041483
ENSMUSG00000032103	ENSMUSG00000004846	ENSMUSG00000036257	ENSMUSG00000028522	ENSMUSG00000042507	ENSMUSG00000020811	ENSMUSG00000032002
ENSMUSG00000059189	ENSMUSG00000029027	ENSMUSG00000028347	ENSMUSG00000031661	ENSMUSG00000043019	ENSMUSG00000021143	ENSMUSG00000071253
ENSMUSG00000030871	ENSMUSG00000086254	ENSMUSG00000022637	ENSMUSG00000026198	ENSMUSG00000039988	ENSMUSG00000035576	ENSMUSG00000026867
ENSMUSG00000020736	ENSMUSG00000038838	ENSMUSG00000025738	ENSMUSG00000025878	ENSMUSG00000029428	ENSMUSG00000017774	ENSMUSG00000098318
ENSMUSG00000023452	ENSMUSG00000020646	ENSMUSG00000066551	ENSMUSG00000020289	ENSMUSG00000011831	ENSMUSG00000007670	ENSMUSG00000026499
ENSMUSG00000028228	ENSMUSG00000031993	ENSMUSG00000020608	ENSMUSG00000029208	ENSMUSG00000062397	ENSMUSG00000032220	ENSMUSG00000089762
ENSMUSG00000024726	ENSMUSG00000022791	ENSMUSG00000028415	ENSMUSG00000000142	ENSMUSG00000032184	ENSMUSG00000037348	ENSMUSG00000027007
ENSMUSG00000074582	ENSMUSG00000046442	ENSMUSG00000033326	ENSMUSG00000032549	ENSMUSG00000048376	ENSMUSG00000030172	ENSMUSG00000000959
ENSMUSG00000022185	ENSMUSG00000035262	ENSMUSG00000026153	ENSMUSG00000074406	ENSMUSG00000086782	ENSMUSG00000045975	ENSMUSG00000028343
ENSMUSG00000044155	ENSMUSG00000016503	ENSMUSG00000049214	ENSMUSG00000086531	ENSMUSG00000032512	ENSMUSG00000035441	ENSMUSG00000024576
ENSMUSG00000001247	ENSMUSG00000029844	ENSMUSG00000027900	ENSMUSG00000089889	ENSMUSG00000031078	ENSMUSG00000046861	ENSMUSG00000038517
ENSMUSG00000034993	ENSMUSG00000071531	ENSMUSG00000038065	ENSMUSG00000051557	ENSMUSG00000047565	ENSMUSG00000028224	ENSMUSG00000021779
ENSMUSG00000059824	ENSMUSG00000028967	ENSMUSG00000075190	ENSMUSG00000022377	ENSMUSG00000044308	ENSMUSG00000045302	ENSMUSG00000074211
ENSMUSG00000078784	ENSMUSG00000000776	ENSMUSG00000033096	ENSMUSG00000025218	ENSMUSG00000035125	ENSMUSG00000021458	ENSMUSG00000064289
ENSMUSG00000042046	ENSMUSG00000035834	ENSMUSG00000039069	ENSMUSG00000020482	ENSMUSG00000026278	ENSMUSG00000002052	ENSMUSG00000018651
ENSMUSG00000040463	ENSMUSG00000025190	ENSMUSG00000033596	ENSMUSG00000028889	ENSMUSG00000005510	ENSMUSG00000002718	ENSMUSG00000025366
ENSMUSG00000049287	ENSMUSG00000036327	ENSMUSG00000033813	ENSMUSG00000031758	ENSMUSG00000034194	ENSMUSG00000031601	ENSMUSG00000001100
ENSMUSG00000022354	ENSMUSG00000048756	ENSMUSG00000022272	ENSMUSG00000005682	ENSMUSG00000034118	ENSMUSG00000020464	ENSMUSG00000046573
ENSMUSG00000034345	ENSMUSG00000031827	ENSMUSG00000040325	ENSMUSG00000025323	ENSMUSG00000039523	ENSMUSG00000078619	ENSMUSG00000022019
ENSMUSG00000005683	ENSMUSG00000032458	ENSMUSG00000057788	ENSMUSG00000085793	ENSMUSG00000036214	ENSMUSG00000016018	ENSMUSG00000021357
ENSMUSG00000056209	ENSMUSG00000030002	ENSMUSG00000021893	ENSMUSG00000025722	ENSMUSG00000022679	ENSMUSG00000041161	ENSMUSG00000015176
ENSMUSG00000028902	ENSMUSG00000019433	ENSMUSG00000074682	ENSMUSG00000014767	ENSMUSG00000056962	ENSMUSG00000021621	ENSMUSG00000047731
ENSMUSG00000020133	ENSMUSG00000021476	ENSMUSG00000041193	ENSMUSG00000038085	ENSMUSG00000021432	ENSMUSG00000030609	ENSMUSG00000020441
ENSMUSG00000050912	ENSMUSG00000031023	ENSMUSG00000079111	ENSMUSG00000031458	ENSMUSG00000021428	ENSMUSG00000052566	ENSMUSG00000029020
ENSMUSG00000085984	ENSMUSG00000027131	ENSMUSG00000036371	ENSMUSG00000020020	ENSMUSG00000038403	ENSMUSG00000034300	ENSMUSG00000027177
ENSMUSG00000049300	ENSMUSG00000002103	ENSMUSG00000001870	ENSMUSG00000015143	ENSMUSG00000061136	ENSMUSG00000033909	ENSMUSG00000021314
ENSMUSG00000045316	ENSMUSG00000040410	ENSMUSG00000033389	ENSMUSG00000048118	ENSMUSG00000026781	ENSMUSG00000041957	ENSMUSG00000042063
ENSMUSG00000046753	ENSMUSG00000028670	ENSMUSG00000022706	ENSMUSG00000018372	ENSMUSG00000034401	ENSMUSG00000034216	ENSMUSG00000018334
ENSMUSG00000025226	ENSMUSG00000024736	ENSMUSG00000073728	ENSMUSG00000044791	ENSMUSG00000056820	ENSMUSG00000033728	ENSMUSG00000034032
ENSMUSG00000031979	ENSMUSG00000031708	ENSMUSG00000020328	ENSMUSG00000032777	ENSMUSG00000054280	ENSMUSG00000045713	ENSMUSG00000001909
ENSMUSG00000038982	ENSMUSG00000009566	ENSMUSG00000089832	ENSMUSG00000086537	ENSMUSG00000037111	ENSMUSG00000019857	ENSMUSG00000079469
ENSMUSG00000022749	ENSMUSG00000023460	ENSMUSG00000063434	ENSMUSG00000060279	ENSMUSG00000066640	ENSMUSG00000021124	ENSMUSG00000020024
ENSMUSG00000064030	ENSMUSG00000022962	ENSMUSG00000030654	ENSMUSG00000041846	ENSMUSG00000028069	ENSMUSG00000073542	ENSMUSG00000003437
ENSMUSG00000061079	ENSMUSG00000058258	ENSMUSG00000024477	ENSMUSG00000022008	ENSMUSG00000026853	ENSMUSG00000028430	ENSMUSG00000005958
ENSMUSG00000059713	ENSMUSG00000040033	ENSMUSG00000040354	ENSMUSG00000025774	ENSMUSG00000029174	ENSMUSG00000022108	ENSMUSG00000021999
ENSMUSG00000028961	ENSMUSG00000042564	ENSMUSG00000020263	ENSMUSG00000049086	ENSMUSG00000059482	ENSMUSG00000035139	ENSMUSG00000031851
ENSMUSG00000085405	ENSMUSG00000058600	ENSMUSG00000056124	ENSMUSG00000005886	ENSMUSG00000090266	ENSMUSG00000025212	ENSMUSG00000035064
ENSMUSG00000034854	ENSMUSG00000098188	ENSMUSG00000028236	ENSMUSG00000038860	ENSMUSG00000029191	ENSMUSG00000010660	ENSMUSG00000042423
ENSMUSG00000078773	ENSMUSG00000024862	ENSMUSG00000041935	ENSMUSG00000021555	ENSMUSG00000015092	ENSMUSG00000034538	ENSMUSG00000049354
ENSMUSG00000047554	ENSMUSG00000062580	ENSMUSG00000025967	ENSMUSG00000027067	ENSMUSG00000025917	ENSMUSG00000029681	ENSMUSG00000037361
ENSMUSG00000043895	ENSMUSG00000021996	ENSMUSG00000070527	ENSMUSG00000038305	ENSMUSG00000032402	ENSMUSG00000042348	ENSMUSG00000026193
ENSMUSG00000041775	ENSMUSG00000044533	ENSMUSG00000026764	ENSMUSG00000068798	ENSMUSG00000018217	ENSMUSG00000029422	ENSMUSG00000067722
ENSMUSG00000010721	ENSMUSG00000059439	ENSMUSG00000070337	ENSMUSG00000028560	ENSMUSG00000035152	ENSMUSG00000029467	ENSMUSG00000020576
miRBase:MI0000156	ENSMUSG00000026245	ENSMUSG00000000916	ENSMUSG00000029390	ENSMUSG00000040435	ENSMUSG00000068696	ENSMUSG00000027459
ENSMUSG00000074766	ENSMUSG00000047654	ENSMUSG00000031482	ENSMUSG00000022048	ENSMUSG00000022946	ENSMUSG00000041040	ENSMUSG00000051910
ENSMUSG00000026915	ENSMUSG00000039176	ENSMUSG00000050555	ENSMUSG00000026313	ENSMUSG00000027865	ENSMUSG00000029364	ENSMUSG00000031861
ENSMUSG00000042742	ENSMUSG00000028649	ENSMUSG00000063410	ENSMUSG00000022972	ENSMUSG00000003660	miRBase:MI0021584	ENSMUSG00000045365
ENSMUSG00000025912	ENSMUSG00000027180	ENSMUSG00000015846	ENSMUSG00000004789	ENSMUSG00000026158	ENSMUSG00000019178	ENSMUSG00000026604
ENSMUSG00000024914	ENSMUSG00000016921	ENSMUSG00000061607	ENSMUSG00000017412	ENSMUSG00000052539	ENSMUSG00000027132	ENSMUSG00000034801
ENSMUSG00000039059	ENSMUSG00000020877	ENSMUSG00000027314	ENSMUSG00000025280	ENSMUSG00000050565	ENSMUSG00000049119	ENSMUSG00000025938
miRBase:MI0000571	ENSMUSG00000031776	ENSMUSG00000018983	ENSMUSG00000013275	ENSMUSG00000038844	ENSMUSG00000036622	ENSMUSG00000039911
ENSMUSG00000032890	ENSMUSG00000002055	ENSMUSG00000022246	ENSMUSG00000041263	ENSMUSG00000032112	ENSMUSG00000087579	ENSMUSG00000032565
ENSMUSG00000035168	ENSMUSG00000042724	ENSMUSG00000032459	ENSMUSG00000056708	ENSMUSG00000039157	ENSMUSG00000034653	ENSMUSG00000022681
ENSMUSG00000035234	ENSMUSG00000036009	ENSMUSG00000042744	ENSMUSG00000041926	ENSMUSG00000018001	ENSMUSG00000034429	ENSMUSG00000028863
ENSMUSG00000051934	ENSMUSG00000017314	ENSMUSG00000033316	ENSMUSG00000040687	miRBase:MI0000721	ENSMUSG00000019952	ENSMUSG00000027134
ENSMUSG00000024346	ENSMUSG00000015189	ENSMUSG00000036097	ENSMUSG00000039976	ENSMUSG00000024764	ENSMUSG00000021918	ENSMUSG00000001270
ENSMUSG00000097626	ENSMUSG00000057897	ENSMUSG00000040913	ENSMUSG00000060591	ENSMUSG00000042647	ENSMUSG00000051786	ENSMUSG00000032051
ENSMUSG00000028456	ENSMUSG00000030287	ENSMUSG00000033540	ENSMUSG00000053310	ENSMUSG00000028962	ENSMUSG00000018476	ENSMUSG00000032633
ENSMUSG00000028484	ENSMUSG00000027520	ENSMUSG00000038954	ENSMUSG00000036779	ENSMUSG00000021611	ENSMUSG00000032705	ENSMUSG00000037824
ENSMUSG00000057342	ENSMUSG00000001823	ENSMUSG00000030590	ENSMUSG00000023456	ENSMUSG00000097021	ENSMUSG00000041219	ENSMUSG00000002984
ENSMUSG00000053754	ENSMUSG00000048307	ENSMUSG00000031505	ENSMUSG00000024287	ENSMUSG00000010095	ENSMUSG00000054387	ENSMUSG00000020409
ENSMUSG00000028861	ENSMUSG00000032580	ENSMUSG00000024670	ENSMUSG00000040669	ENSMUSG00000079677	ENSMUSG00000026825	ENSMUSG00000010751
ENSMUSG00000041729	ENSMUSG00000026511	ENSMUSG00000058056	ENSMUSG00000059772	ENSMUSG00000044986	ENSMUSG00000020471	ENSMUSG00000027601
ENSMUSG00000029478	ENSMUSG00000030588	ENSMUSG00000005813	ENSMUSG00000028898	ENSMUSG00000020525	ENSMUSG00000022020	ENSMUSG00000078570
ENSMUSG00000030061	ENSMUSG00000035530	ENSMUSG00000085967	ENSMUSG00000034714	ENSMUSG00000032412	ENSMUSG00000029752	ENSMUSG00000042292
ENSMUSG00000017615	ENSMUSG00000029175	ENSMUSG00000047022	ENSMUSG00000027936	ENSMUSG00000019818	ENSMUSG00000004567	ENSMUSG00000031820
ENSMUSG00000032114	ENSMUSG00000031585	ENSMUSG00000020850	ENSMUSG00000030204	ENSMUSG00000035575	ENSMUSG00000022142	ENSMUSG00000037514
ENSMUSG00000007050	ENSMUSG00000024742	ENSMUSG00000027469	ENSMUSG00000046947	ENSMUSG00000028101	ENSMUSG00000027259	ENSMUSG00000026922
ENSMUSG00000074221	ENSMUSG00000019782	ENSMUSG00000033735	ENSMUSG00000055980	ENSMUSG00000017760	ENSMUSG00000004530	ENSMUSG00000051671
ENSMUSG00000030189	ENSMUSG00000041837	ENSMUSG00000079477	ENSMUSG00000021392	ENSMUSG00000067148	ENSMUSG00000024807	ENSMUSG00000005501
ENSMUSG00000030678	ENSMUSG00000026135	ENSMUSG00000052962	ENSMUSG00000034006	ENSMUSG00000078441	ENSMUSG00000050043	ENSMUSG00000020814
ENSMUSG00000037772	ENSMUSG00000020275	ENSMUSG00000021589	ENSMUSG00000089083	ENSMUSG00000043190	ENSMUSG00000074030	ENSMUSG00000032193
ENSMUSG00000039156	ENSMUSG00000031834	ENSMUSG00000032497	ENSMUSG00000025872	ENSMUSG00000071650	ENSMUSG00000084880	ENSMUSG00000032547
ENSMUSG00000025173	ENSMUSG00000022451	ENSMUSG00000055932	ENSMUSG00000039230	ENSMUSG00000000958	ENSMUSG00000023235	ENSMUSG00000003662
ENSMUSG00000041084	ENSMUSG00000024824	ENSMUSG00000049285	ENSMUSG00000091874	ENSMUSG00000006191	ENSMUSG00000031604	ENSMUSG00000002550
ENSMUSG00000038880	ENSMUSG00000038633	ENSMUSG00000024661	ENSMUSG00000006442	ENSMUSG00000068917	ENSMUSG00000030077	ENSMUSG00000035236
ENSMUSG00000062054	ENSMUSG00000041068	ENSMUSG00000098557	ENSMUSG00000097855	ENSMUSG00000020088	ENSMUSG00000052525	ENSMUSG00000079003
ENSMUSG00000034724	ENSMUSG00000033632	ENSMUSG00000020032	ENSMUSG00000034022	ENSMUSG00000028675	ENSMUSG00000024665	ENSMUSG00000032115
ENSMUSG00000040557	ENSMUSG00000038279	ENSMUSG00000020029	ENSMUSG00000035245	ENSMUSG00000040675	ENSMUSG00000047767	ENSMUSG00000020592
ENSMUSG00000068335	ENSMUSG00000061937	ENSMUSG00000041471	ENSMUSG00000040865	ENSMUSG00000026883	ENSMUSG00000066595	ENSMUSG00000020808
ENSMUSG00000034384	ENSMUSG00000044864	ENSMUSG00000024074	ENSMUSG00000006527	miRBase:MI0021905	ENSMUSG00000040433	ENSMUSG00000021056
ENSMUSG00000063884	ENSMUSG00000026623	ENSMUSG00000031075	ENSMUSG00000026097	ENSMUSG00000026342	ENSMUSG00000001098	ENSMUSG00000021098
ENSMUSG00000024201	ENSMUSG00000008604	ENSMUSG00000006169	ENSMUSG00000057531	ENSMUSG00000043398	ENSMUSG00000013076	ENSMUSG00000042570
ENSMUSG00000021951	ENSMUSG00000070858	ENSMUSG00000040928	ENSMUSG00000027714	ENSMUSG00000021375	ENSMUSG00000042359	ENSMUSG00000042268
ENSMUSG00000030166	ENSMUSG00000028914	ENSMUSG00000036093	ENSMUSG00000016200	ENSMUSG00000027581	ENSMUSG00000050192	ENSMUSG00000022280
ENSMUSG00000003038	ENSMUSG00000036282	ENSMUSG00000057637	ENSMUSG00000094156	ENSMUSG00000021468	ENSMUSG00000057110	ENSMUSG00000042104
ENSMUSG00000003382	ENSMUSG00000034206	ENSMUSG00000033170	ENSMUSG00000095567	ENSMUSG00000051452	ENSMUSG00000036943	ENSMUSG00000038848
ENSMUSG00000025047	ENSMUSG00000046111	ENSMUSG00000087213	ENSMUSG00000021481	ENSMUSG00000026024	ENSMUSG00000006818	ENSMUSG00000039356
ENSMUSG00000026181	ENSMUSG00000027751	ENSMUSG00000021012	ENSMUSG00000079478	ENSMUSG00000032386	ENSMUSG00000002679	ENSMUSG00000040242
ENSMUSG00000029177	ENSMUSG00000047789	ENSMUSG00000032786	ENSMUSG00000045636	ENSMUSG00000053293	ENSMUSG00000038368	ENSMUSG00000035069
ENSMUSG00000032586	ENSMUSG00000058638	ENSMUSG00000038806	ENSMUSG00000093772	ENSMUSG00000033416	ENSMUSG00000030754	ENSMUSG00000028455
ENSMUSG00000061983	ENSMUSG00000086290	ENSMUSG00000027243	ENSMUSG00000053333	ENSMUSG00000056310	ENSMUSG00000026196	ENSMUSG00000044345
ENSMUSG00000065990	ENSMUSG00000059248	ENSMUSG00000026782	ENSMUSG00000031441	ENSMUSG00000064307	ENSMUSG00000040097	ENSMUSG00000006219
ENSMUSG00000028990	ENSMUSG00000098927	ENSMUSG00000024078	ENSMUSG00000063019	ENSMUSG00000020817	ENSMUSG00000020660	ENSMUSG00000040302
ENSMUSG00000063605	ENSMUSG00000059089	ENSMUSG00000044164	ENSMUSG00000052337	ENSMUSG00000069170	ENSMUSG00000043929	ENSMUSG00000032363
ENSMUSG00000041205	ENSMUSG00000039529	ENSMUSG00000038736	ENSMUSG00000001482	ENSMUSG00000090247	ENSMUSG00000023967	ENSMUSG00000042195
ENSMUSG00000005378	ENSMUSG00000018923	ENSMUSG00000028187	ENSMUSG00000024181	ENSMUSG00000033068	ENSMUSG00000019864	ENSMUSG00000043923
ENSMUSG00000031529	ENSMUSG00000056724	ENSMUSG00000003346	ENSMUSG00000055839	ENSMUSG00000045665	ENSMUSG00000035024	ENSMUSG00000017754
ENSMUSG00000031901	ENSMUSG00000005609
RIF1	POU5F1	GM5091	SLC25A46	PIPOX	AGO1	A730056A06RIK	NRARP	SOX2	CNPY1	ZFP64	NCAM2	MIR8110	MMS22L	MBOAT1	PRUNE2	TRPC7	ZFP36L1	MIR6386	DLL1
H2AFB1	OLFR90	YTHDF3	SKIL	CNOT2	ZFP788	ACP6	KIF26B	PLEKHG1	ANKS1B	DNAJB8	LCE1D	LRRC74	RBBP8	AKR1D1	REST	ELAVL2	JARID2	LSAMP	TMEM132D
FOXH1	SLC35F4	NID2	MGA	SOX13	TCF7	TOX	IGFBPL1	TRAF6	ZC3H11A	FOXI3	EFR3A	SMTNL2	RBM27	MTF2	RAB11FIP4OS1	CRB2	SLAIN2	OSCAR	ECHDC2
1700019E08RIK	GSX2	LEFTY2	GALNT5	PLA2G1B	SMARCA2	TIMM21	BC006965	PDCD5	SIX4	ZMAT4	CLEC2L	FAT1	SHISA3	KAT2B	ENOX1	SARS	CSRP1	CNR1	NAF1
TAF15	PBX3	ARHGAP32	BTD	PDCL2	UBE2H	MARK3	CPNE5	RPS6KA5	SAMD7	KIF21A	MON1B	GPT2	MYF5	URM1	GM5766	CGGBP1	WDR3	4932441J04RIK	NXPH1
ALDOART1	TOP2B	AW146154	NMUR2	ITGB3	TGIF1	CNTNAP4	CRYZ	MTCL1	RERE	MAPK4	MIR187	4930517E11RIK	ROBO1	HS3ST5	SETX	CTNNA1	ZFC3H1	FAM53A	ASTN2
RHBDL3	SEMA6D	LRRN3	MIR92B	PTCH1	ZFP521	TGFB2	SLC2A2	LFNG	PPP2R2D	PITPNB	EYA4	ZCRB1	FAM78B	HSD17B14	SAE1	TLE3	UTF1	SDF2	TEC
LRRC8C	GM12718	NT5DC3	DOK5	SS18	GALNT7	RAD18	PPP4R4	ZBTB2	SLC9A9	ZFPM1	PJA1	HIBCH	PEG12	MEX3A	DSCAM	TBC1D24	FOXO1	LMO2	PIK3C3
BC068157	GM17359	GADD45G	PPARGC1A	NTM	VCAN	MIR568	FAM19A4	4930461G14RIK	SCMH1	GM10532	BCL2L11	RPL22L1	KCNJ16	IRX1	YIPF6	REEP3	SGK1	KIF20B	KLF9
CFAP44	ARHGAP42	CHIC1	GADL1	TJP1	DIP2C	GM4861	PLEKHA3	RNF115	CTGF	PAX3	LDHD	FAR1	TET3	ZBTB45	RIT2	EBF2	PLA1A	9430041J12RIK	NOTCH1
HRH4	1810011O10RIK	CENPV	1810058I24RIK	LMOD3	NDUFB5	LY86	FAM98A	NUFIP1	PRKAR2B	PEX3	ZFML	VWC2	CCDC138	PFKP	LRRN2	ADNP	FAM124B	GNRHR	GJA1
LZTS1	REEP2	MAMDC2	PIH1D3	RBMXL2	3110099E03RIK	EHMT1	KLF6	RUNX1T1	RSPO3	RREB1	HS6ST1	PSG22	MASP1	TNFRSF13C	ZFP280B	SRSF1	NFKB2	NAV2	SNAP29
CUEDC1	ARHGEF38	PTPRK	DSEL	FERT2	PLCB1	SPTSSA	HNRNPU	WNT5B	SORCS1	SCAP	1700008P02RIK	TFAP2B	ZSCAN10	RMDN1	PTK2	5930412G12RIK	TLE1	SLC35G2	PHLPP1
GPATCH8	TPO	GM5089	FOXN3	UBTF	SUZ12	ARL14EP	SERTAD2	PLCG2	NDUFAF6	PARD3	VMN2R19	ADCY2	CPT1A	ZFP623	MIR7224	CK137956	GP49A	MIR3072	DAB1
HELB	1700028P15RIK	UBAC1	CSNK2A2	PIP4K2C	TRAPPC11	HK2	MRPL42	TNFSF11	FGGY	NCOA1	MYOF	SEZ6	CCSER2	HNRNPR	TRH	ETV1	IFT57	KCND2	FAM135B
NALCN	VSTM2L	NABP1	DCLK3	DMTN	EPB4.1L1	RANBP17	MCL1	THOP1	SET	EPHA7	SEMA3D	FAM50B	TCF7L1	GMNC	EDEM1	NANOG	PDPN	SIS	INMT
BRINP2	MXI1	MYO18A	OLFR761	UBE2D1	CDK5RAP2	HAUS1	MUT	MPPED2	4930556M19RIK	MS4A10	SMIM23	GLRX5	TSPAN11	ETV6	TMEM131	1700121N20RIK	KLF4	4930558G05RIK	RARG
OAS1F	A930018P22RIK	HS2ST1	MAP7D1	KCNT2	ABCG8	GPR160	SEMA5B	FAM84A	UGT2A3	DKK3	MAPKAP1	MCTP2	GM5083	TIAM1	VDAC1	LATS2	MEIG1	ADAM7	4931429L15RIK
WRN	CADPS	EEF1A1	MIR296	NMBR	LRRC52	DHRS7	CADM3	SSR2	5730420D15RIK	GNE	TRIO	C1GALT1	HOXB1	HIVEP2	HECW1	MIR6373	ANO5	LARP1	TSHZ1
2510009E07RIK	STARD13	FAM84B	USP6NL	NDUFS6	AHI1	TFDP2	ALG8	FAM126B	AKAP12	AADAT	MMRN1	SESTD1	AI662270	KIZ	ATF5	4930581F22RIK	ZFP384	CPS1	ASXL1
IFT52	BRD1	DTNB	CCT8	GNAI1	KCNH8	LPP	ZCCHC7	MIR688	FSTL5	SHROOM3	AHCYL2	UTRN	OSBPL8	GNAI2	TSR2	PMPCB	GM16998	1700017G19RIK	UBE2E1
TSPAN2	DNTT	WDR7	AI429214	HIST1H2BE	CDYL	CYP19A1	RPN2	HSP90AA1	ATP10A	CENPO	GAP43	GALR2	SLC16A6	PSAT1	DBX1	TNS3	AGPS	A930019D19RIK	COX7A2L
SLC18B1	EBI3	OLFR1370	AP3B2	UQCRB	CCNL1	HBP1	HUS1	DARS	ARL4A	GUCA2A	CPEB2	4930465M20RIK	C630028M04RIK	ATP5B	CFTR	NRIP1	RAB3GAP2	PDYN	STOML1
PARVG	ETL4	RPS6KA1	HDAC9	THPO	NFYB	RPSA	EIF4EBP1	ZFP217	OLFR486	HSPA4	DUSP12	PDHB	SPNS3	FAM134B	LIMS1	CCRN4L	HGF	MAFB	9230116N13RIK
SULT2A3	SPRED2	4930578M01RIK	LRRTM4	GTPBP4	TXLNG	DEFB1	E130018N17RIK	SP8	THBS2	SLC10A2	CBFA2T2	MMEL1	DUSP4	A930012L18RIK	PMM1	PSMG4	TCP10C	PCMTD1	PSMD7
LRCH3	RBMS3	SESN3	2410088K16RIK	NODAL	ERGIC1	ADAM19	PTMA	EEPD1	NFIB	COMMD7	NACA	RAP1B	CD96	MGMT	GAS2L3	HNF4G	URGCP	FRYL	GM765
WDR18	FOXB1	NRXN1	SPAG9	MUL1	SNTN	PVRL3	PTBP2	KYNU	FGD2	3300005D01RIK	CDH19	DNAJB12	CCNC	KLHL7	CHD2	ORC2	REPS1	EIF5	SLC25A40
4931429P17RIK	DAXX	OTX2OS1	VPS4A	TCF12	RBM39	NF2	1700028I16RIK	SATB2	MARCH8	EIF4G2	AP3B1	RPS19	COPS3	RPL9	PGAP1	NSMCE2	ACER2	FIGN	BANF2
PTP4A2	SOX7	UBXN2A	RAG2	PREP	9530068E07RIK	ENGASE	PRPS1	GHR	LPHN2	SYNRG	MAD2L1	BCL10	TSC22D1	CEP68	PDS5A	FAM229B	SPACA7	1700061F12RIK	DTNA
THSD4	IPMK	DMD	CTBS	HIVEP1	SLC30A5	CASP12	FGFR1	TMA16	SIK1	SHROOM2	H2AFZ	JAK2	VPS26A	MYEF2	MIF	MIR8120	1700019D03RIK	AMOTL2	SLC28A1
INHBA	GM8439	ACKR4	TMEM220	TXLNB	FOXRED2	MFAP3	LUC7L3	CAPZB	GRPEL1	PECAM1	ELOVL6	SAMD4	EWSR1	PI4K2A	WTAP	GLG1	UBC	SERPING1	TWISTNB
RFX4	TRP53BP1	F13B	1700112E06RIK	ZFHX3	BMI1	RCC1	STAG1	FCER2A	NAP1L1	CDX1	RMST	TTC8	PPP3CA	TTC17	TEAD1	USP34	SLC12A2	ECT2	RNMTL1
ARSJ	LRIG3	FREM2	LRRTM3	GOT2	CRTAP	SOCS2	DYDC2	VMN2R3	GM13498	4931440F15RIK	RMDN2	IFITM1	DGKG	PLD1	SASS6	MIR6413	SART3	GM6792	INO80
B3GNT2	ALDH1A2	EPHA1	GNAZ	TSACC	ZEB2	TMEM38B	RTN3	1700003H04RIK	SF1	ARID5B	KLHL24	EEA1	AKR1B8	MIR290A	RBPMS	SCAF4	FNDC1	DEPDC5	DICER1
ACTB	SNORA26	COPS7A	MTDH	PDZRN4	EIF4H	DNAJC2	HERC4	BAG4	ETNK1	SKP1A	NIP7	KDM3B	RAN	RPS18	TCERG1	MRFAP1	TTC39B	CDKL4	2610020H08RIK
A330102I10RIK	TIMM9	SLC25A36	FANCB	IWS1	SLC5A1	NLRP1C-PS	MAB21L2	YARS2	D930015E06RIK	RCOR2	A830080D01RIK	SLC22A17	XYLT1	RRS1	RALY	ZDHHC9	METTL20	SRSF7	FAR2
KLHL31	OLFR487	TGFBRAP1	SLC35G1	PPIB	BC048507	TTC14	FAM136A	SHB	DDX18	TSN	ING2	MIR6238	SRFBP1	BCKDHB	PAWR	A530072M11RIK	DHPS	ESYT3	RBFA
PGRMC2	GNB2L1	TNRC6B	TMEM17	TLK2	RNF138	LSM14A	CDK17	TRA2A	DPYSL3	PTGIS	4930480K15RIK	MTPAP	UBAC2	CIT	GM8709	MED13L	TMEM57	ARHGEF19	MTMR3
IZUMO2	GTF3C4	PPAP2B	EPB4.1L4A	NRP2	9030617O03RIK	ATXN2L	PTGFRN	LRRTM1	TPM3	SLC26A5	MAK16	DPF2	CALM2	STARD7	RPL4	PRKAA1	HECTD1	MIR6354	SMC4
SLC10A7	OXGR1	MICAL1	LPAR4	KDM1A	FANCM	SYNCRIP	L3HYPDH	FAM25C	ALG13	CCNA2	MTUS2	ZC3H12C	SLC35F1	PANTR1	GULP1	HSDL1	COBLL1	SIX2	KANK2
SENP2	FBXO42	1700056E22RIK	SUV420H1	DNM2	USP9X	MKI67	MIR378B	KLF7	CNTNAP5B	TPST2	SRRM4OS	9530026P05RIK	SPEF1	ST8SIA6	SLC1A5	EPB4.1	ERICH3	1700123O12RIK	SOX5
MAP2K3OS	CLIC4	CYC1	PLSCR3	NTSR1	RALGAPA2	DCAF8	TAC1	CDH3	CDH18	MTRR	TMEM132B	GNG13	PDS5B	XRN2	4933406G16RIK	ADAMTS5	RRAGC	TAAR8B	SEC63
NAE1	4931440J10RIK	GDI2	ZFP1	STXBP1	LY6E	FBXO22	UBE2G1	DNAJC3	PDK1	4930509E16RIK	GM7457	LDHA	USP7	VSTM2A	GDF5	BUB1	IGSF11	ODF2	ANKRD6
NNT	DRG1	EPS8	PIK3R1	1810013L24RIK	MESP2	SEC24C	RPS14	IER2	COPS2	ZFP553	JADE1	HNRNPH1	ABCA1	MIR3089	TNKS2	NNMT	RNF4	ATPAF2	4930444G20RIK
MEIS1	TAX1BP1	ATF6B	KLF2	CRADD	RINT1	GREB1L	RBM22	TARDBP	MFSD11	KAT7	TMEM260	SGPL1	MED13	ATRNL1	NOS1AP	PABPC6	DNAJC12	1700021F05RIK	ASIC5
SLC35D2	CCDC71	BOD1L	DNAJC5	MMP1A	NPLOC4	SMIM12	CLK4	MPZL1	KAZN	MAGI2	FAM89B	RPS19BP1	GPD2	E330013P04RIK	4930552P12RIK	ANKRD36	BPTF	GPHN	MPLKIP
GM11186	PNRC1	NARS2	BCAR3	TMEM39A	1700017B05RIK	MARCKS	TMC1	RNF152	LIN7C	PDCD10	DUSP28	FKBP4	GM14634	LDB2	SCGB1C1	MAPK1	DUSP21	MORF4L1	2610035F20RIK
STRN	ENAH	ZER1	MGAT2	BTAF1	MCPH1	CNOT1	ENPP3	TBL1XR1	MYOM2	HP1BP3	POU2F1	BBS7	2410141K09RIK	SPRY1	DUT	AGBL1	HNRNPDL	COX16	SVIL
SUB1	ADCY8	GSTCD	ZFP27	DUSP6	TMCO1	GTDC1	TMEM229A	SULF1	DMBX1	SGMS1	CHD1L	PPP1R3B	WDR11	KHDRBS1	ZBTB34	SRPR	RGL1	LRRC41	PUM1
CDV3	GRAP2	CDH1	TSG101	CDT1	UQCRQ	TMEM248	DTWD2	NFYA	DCAF12	GPX4	DDX24	MRPS24	RPS28	MCU	FSCN1	CLEC11A	DEPTOR	ZRANB2	A530054K11RIK
PIN1	EPRS	UBXN1	UCHL5	NOL9	WBP11	GAPDH	ETAA1	ARPC2	CLK1	RPL27A	HMGCR	MRPS2	RSBN1L	EIF4E2	ADPGK	AKAP10	PRDM5	RPS3	2810403A07RIK
SLC31A2	DNAJC8	CDKN1B	SNX6	PON1	NSFL1C	EDC4	IL17RD	HVCN1	DGKE	BANF1	TRIM37	NUS1	SZRD1	CAAP1	NCL	EMC6	P4HB	PDCD2L	EZH1
SLC1A4	RNASEH2A	MYOZ1	ZFP518A	PCM1	PAK7	SMS	TNIP3	GPR19	E130308A19RIK	PIGS	ADAM10	ARL8A	CHD1	ETNPPL	CYP2J13	MLLT4	1700046C09RIK	TRAPPC8	KTN1
HOMER3	UNC80	PEX5L	HNRNPH3	IPO11	GM11487	YTHDC1	BBS1	LTN1	SP6	RBFOX1	AKT2	GATAD2A	ZC3HAV1L	SYT2	MED12L	IGF2BP1	PREX2	NHSL1	RFX8
FHIT	TTPA	6430503K07RIK	FIGNL1	SLC7A11	TEX29	YAP1	KAT6B	ARF6	SYS1	CBLN4	ATAD2	CD86	RPS13	COL25A1	NUDT19	HMGB2	PDGFA	SOAT1	UBE2G2
VPS13B	SRSF4	NAA50	GTF3C3	CELRR	SPEER2	CCNL2	GM16907	NELFE	RGMB	APBB2	CCNA1	AP4S1	RASL11B	SLC39A14	PIGM	MIR302B	ARF3	DNAJC27	PPAP2A
IMMP2L	ETF1	TRP73	ATRN	LRPPRC	DNTTIP2	SEC14L1	FAM162A	VAC14	GM10069	ZFP668	BAZ2B	MSANTD2	RBPJ	PSMD3	EIF4A2	RPS15A	CTNND1	ARHGEF18	NCOR1
DYNC1LI2	CUL4A	LIMA1	NCOA7	GTPBP10	TIA1	ZFP266	GM15772	DDX5	FBXO9	BDH1	SNORD1C	EEF1E1	RPL28	ACAP2	NUP188	IKBKB	OSER1	GM15350	PPP1CC
LONP1	MTSS1	TNIP1	VDAC3	CRY1	BRD2	C130036L24RIK	SPTBN1	SRRT	PRPSAP1	VPS35	GAS1	SEC24A	SNRPB	EIF4EBP2	SLC22A29	CCND3	ZFP367	IDH3A	LARP4B
RPL18	ZFP819	PPP4C	PAPSS1	NFATC2IP	NOB1	OPN3	RPS10	TUBA1C	ARMC6	ATP5G3	ZFYVE20	RSBN1	MDM2	PVR	KLHL11	4933426M11RIK	UBXN8	ARF1	GTF2H1
SBNO1	PNN	MRTO4	PSMA6	RHOA	SMG8	PSMD12	MDM1	AURKB	NCOA5	ITSN1	PUF60	TENM3	COX4I1	ANKRD17	D8ERTD82E	RRM2	ODC1	RNLS	HNRNPK
TANGO6	PAQR3	DVL2	SUPV3L1	CRLF3	RPS3A1	DAZAP2	CDS2	FGD5	MFN1	EPN2	SLC38A2	CTTNBP2NL	CDC34	MIR5133	ARID1A	ACSL5	NTMT1	CHST9	CERS4
5031434O11RIK	SEC31A	NCAPH2	IVNS1ABP	SLC19A2	E2F5	E2F4	E130307A14RIK	ANKRD52	DYNC1I1	ZFP518B	CEP131	MAML1	NPTN	EPB4.1L2	GM362	TRRAP	PDRG1	CUL1	EFHD2
ATP6V1H	YLPM1	PLCG1	KDM1B	CSMD3	SERP1	PITPNC1	CROCC	ELOVL5	PLEKHG3	ARHGAP12	UBXN7	SIDT1	MIR6350	ATP6V1C1	GDF3	GRSF1	ALDH18A1	RLIM	HIBADH
RSRC1	CENPE	SNX18	SPEER3	COL4A3BP	USP24	CAPRIN1	CDR2	ZFAND3	KEAP1	GM20757	DNAJC1	SSU72	NT5M	FBXL3	REV3L	KNCN	SMARCC1	SHC3	DCSTAMP
NIPA2	ICT1	PDLIM7	HTT	MAD1L1	OFCC1	4930595M18RIK	PLEKHA5	RPL10L	FBXO31	TTLL4	CLDN26	PPP5C	PVRL2	TDRD5	RAP2B	NFU1	UBE2W	ST8SIA4	SRSF11
OSBPL1A	SASH1	GM10100	RHEB	KLF10	PGAM5	EIF3E	RWDD3	CELF1	HOOK3	INTS12	IL6ST	CHD7	PITPNA	YDJC	RBCK1	NCBP1	RPL8	LMNB1	CDC5L
FUBP1	RAB1	ATG101	UBE2L3	AVL9	TRIM59	ZFP692	SRRM2	BRD4	RNPS1	CARS	RPS15	ABHD10	DDX19B	KLRB1-PS1	NIT2	CEBPZ	MANF	NR1H2	KBTBD8
KDM5B	LSM11	NPM1	4930432K21RIK	MARK2	RNF10	RHBDD3	PGAM1	ASXL2	CFAP61	ATXN10	SUPT5	CAMK2N1	PPM1A	SNX14	GM4890	PSMA2	XPOT	SNX30	PSKH1
TYMS	RSRP1	EIF5A	SERF2	CHODL	ANKLE2	PRRC1	H13	SYT9	MATR3	INTS2	ZFP335	ABHD13	CDK2AP1	NANP	XPO5	2610507B11RIK	TPP2	ITFG1	NAA15
SH3GL1	GNPAT	ZBTB11	CDKN2AIP	CHTF8	EEF2	HSF2	ATP5L	UBA52	FRMD4A	AMD2	FBXL12OS	EIF3C	PDCD6	SFPQ	SRSF10	PRPF38B	EMC8	EGLN3	GALC
BAHCC1	DDHD2	PSMB2	CBFB	TUBB5	ATG13	PDCD6IP	MRPL1	BAZ2A	KCNC2	TCF25	AKR1C21	MYCL	CCDC174	SELPLG	NFYC	RMI1	XPO6	RPP14	NUTF2-PS1
UTP3	SMEK2	CDC37L1	MCM10	CCDC85A	DENND5B	METTL18	ABCB5	PPTC7	PLEKHM3	CNPY2	ZBTB44	GCM2	BAZ1B	HNRNPL	LIN9	ORC4	GLYR1	PTF1A	MINOS1
SUN1	CYCS	PRKCQ	1600002H07RIK	MIR101A	2310036O22RIK	SAP30	UBFD1	IKZF5	AP3D1	CDCA7	PSMD11	DOC2B	LPPR1	CACUL1	RFFL	CDON	ASXL3	RBM33	SPIDR
NAPA	PRKAR2A	MIR9-2	PSMC1	PPP1CA	XPO7	GM6634	OPCML	SLTM	NLRC4	ARPP19	AKTIP	CAR10	ST18	PROK2	GDE1	ETV4	AY074887	DNAJC10	ARHGAP26
B3GNT9	RRP12	DBF4	FAM193B	TMEM63B	IBTK	SUV39H1	NIN	POLG2	LIPG	ESP23	COX6C	TCF15	USO1	AKR1E1	SERTAD1	BAMBI	GORASP1	CHKA	GNG10
INPPL1	4930455D15RIK	SLC11A2	FBXL19	SNORD58B	EIF3J2	MYCN	A430005L14RIK	ZFP655	PPP2R2COS	FAM60A	ERBB4	KCNJ2	RNF111	MSRA	SLC25A33	GRK6	DLGAP1	TAB2	CBL
CWF19L2	MTMR14	NUDT3	VSIG10	6720483E21RIK	CLCN5	PCSK6	4921501E09RIK	ZFP748	ZFP768	FAM98B	POMT2	WDR20	PHF3	SPAG16	DENND2C	ELTD1	SDC2	RAP1GDS1	CD109
GID8	PTGS1	UBE2K	DEK	FNIP2	NT5DC2	CENPW	SMAD7	LRRC58	UQCR11	DDX51	TMEM154	ARL4C	MIRLET7A-1	TSKU	SEH1L	TOB1	UBE3A	ARVCF	1500012F01RIK
EBNA1BP2	VASP	TSR1	PKM	ABCF2	RPS26	LBR	ALG9	MYSM1	TRIP13	ILF2	LLPH	SEC62	EMG1	NHP2L1	BTF3L4	IP6K1	2210015D19RIK	PCYT2	IRAK3
4921524J17RIK	PROSC	PGLS	ARIH2	RNASEH1	DNAJC11	ENO1B	HSD17B3	PPHLN1	SWAP70	ZBTB43	4933434E20RIK	UCHL3	HEXIM2	CYB5R1	GPN2	AVPI1	ARL6IP4	CHAMP1	EIF4B
ANKIB1	EPN1	PKNOX2	STEAP2	CASC5	ARPC5L	TMED10	PSMC4	UPF2	CLPTM1	LNPEP	CNOT3	TNFRSF19	D1PAS1	TMEM50A	MCAT	CTCF	TIPARP	GABRG2	TMEM167B
SMARCA5-PS	SERPINB6A	IDO2	4833439L19RIK	MRPL43	TDRP	UBE2C	MIR1932	PFN1	CDK19	MAX	DYNLL1	TRAPPC9	USP53	MED30	UQCRFS1	F11	CACYBP	LRRC47	PPP2R4
RRN3	TNPO3	RPL27	LMNB2	HNRNPF	RPS27L	OLFR48	APRT	GAN	CLUH	TICRR	POP4	ARID4B	NHP2	BIRC6	SF3B3	MIR8105	ADAM9	ROCK1	ATP5C1
TRIM39	UTP18	NPAS3	RBM25	IER3	DDX42	PSME3	RARA	ADD3	INTS5	SLC35B2	KMT2D	ARMC1	GRIN2D	FAM13B	CDC42BPB	GCK	EIF3M	HPGD	SPCS3
TXNDC5	FRG1	HNRNPLL	FAM103A1	MIR7681	RPL5	NUPL1	CCT4	NDUFS4	ZFP536	KANSL2	ATL2	GOLM1	ETS2	PDIK1L	GRPEL2	PDIA3	BCL7A	MRPL9	MFI2
SPINT2	STK17B	SPRED1	SURF6	EXO1	UHRF2	EPS15L1	IP6K2	LAMP1	NCAPG	MALAT1	CUL5	TPGS1	PSMC5	MGEA5	ABCE1	TAF4A	VMN2R26	TAF5	ATOH7
9530002B09RIK	DENND6B	GTF2I	FUT8	MPP6	CPSF7	SQRDL	CRIP3	MYO9B	FGF4	SRSF9	TOMM34	FAM20B	FA2H	YPEL5	PTPLAD1	ZFP653	BCKDK	KCNJ3	GABPB1
UBE2DNL1	KLF1	TMEM241	APEH	DRD1A	CAD	STAG2	ANKS1	QSER1	DPY19L1	CEP135	RMDN3	MSRB3	DCAF4	ITGB1	EDIL3	AFF3	PRKAG2	PPP3R1	STXBP6
GSR	4930562F07RIK	THEMIS	FSCB	SMPD4	TRIM33	KLF8	GPR158	TBX15	FBXO33	PACRGL	GM5105	TOP1	ZSWIM6	PCDHGA12	ARMC8	4921531C22RIK	ZBTB25	DYNLRB2	SH2D1A
NGLY1	9530080O11RIK	GPBP1	LAPTM4A	GPRC5A	HSBP1	AU040320	ARAF	PGP	SCRG1	TEX30	JOSD1	CPOX	SLMAP	PTPRG	AK3	CTSF	NFATC3	OLFM4	IL33
EDRF1	EFNB1	AGGF1	UBE2D3	KIF2B	GNG12	GM15706	TMEM229B	ELAVL4	PRDM14	CTAGE5	CTDSP2	COG5	ANO6	SMURF1	MIOS	NEO1	TMCC3	SDHA	1700001G17RIK
VAPA	GPA33	WASH	NT5C2	DACT2	ANP32E	LAP3	CYP2A22	NDST2	VEGFA	MRM1	WDR47	WDR90	CAND1	UBIAD1	IRF2BP1	TMEM2	EML5	CLCN7	ZFP414
TMEM59	HNRNPUL1	UNG	OLFR307	NCAPH	CHAF1B	GRWD1	ANAPC5	NAV3	SAP130	CTNNAL1	MCM7	RBM7	MAT2A	ERAL1	TEX37	THUMPD3	PHRF1	RPL19	GAS5
SEC23IP	U2AF1L4	ERI1	PIGF	1700030J22RIK	KIF3B	FANCA	DPH1	FAM104A	SPRTN	SLC38A7	GCSH	ING1	NOP58	NDOR1	ARPC4	SDF4	TM9SF2	1700123L14RIK	U2SURP
RPN1	4930505A04RIK	SRRM1	GTF2H3	DNAJC13	PPP1R9A	KAT6A	ATP6V0D1	SCN3B	KLF11	SLC4A7	XBP1	HMGXB3	PLEKHF2	DDX31	ATP13A1	1110008F13RIK	SETD6	SAFB	RAD51AP1
URI1	NGRN	RSPRY1	NFAT5	KANSL1	RBFOX2	UTP15	TEX10	GGNBP2	GM13152	2410002F23RIK	1700003F12RIK	ARRDC3	CINP	EXOC7	TNRC6A	EXOSC4	EIF3H	KPNA2	1700016C15RIK
STX6	TUBGCP3	GTPBP6	MIR3063	FASTK	MED26	PSMD14	ZFP831	RING1	TERF2IP	SPAG6	MAP7	PSMG1	HSPBAP1	GID4	TJP2	SENP6	SDHAF2	COX6A1	PLEKHA1
SLC39A7	HEATR6	TUG1	GEMIN5	OPA1	TOMM20	GTPBP3	ANKRD10	SLBP	ATM	NDEL1	MPHOSPH8	MRPS31	PGPEP1L	ZMYM1	EI24	OTOA	RPL31	SNAPIN	MAP3K3
CUX1	LRCH1	MED17	SRSF3	JRK	MGRN1	B230217O12RIK	UBLCP1	MYO1B	TMEM208	TTC29	OCIAD1	REXO1	DHX35	EIF2B5	LRP11	TGFBR3	APIP	1700011L22RIK	DHX15
SRSF2	SPACA3	ZMYND8	N4BP2	RPRD1A	SUMO1	AHSA2	TXNDC12	AKAP8	D930032P07RIK	NIFK	PTGES3	SNRPD3	CSNK2A1	PPID	RBL2	FBXL20	PSMD1	ZMPSTE24	ZFP719
TTC7B	CLDN5	SNX5	TMEM143	MBTPS1	PPP2CB	RAB5A	ATXN1L	KIF2A	WDR82	GAR1	NINL	BRAF	PRG4	ISL2	SEC16A	CNOT6	TCEB3	MIR6420	DNAJC7
ZFP276	INIP	ZFR	MLEC	AHDC1	NR2F2	CDC16	GRM7	TSNAXIP1	PTPN9	CSTF2T	VPS41	GOLT1B	GPN3	PPP2R2A	KLHL42	GAK	CACNB1	RAF1	6330418K02RIK
HSP90AB1	MSL1	RPL29	WRAP53	METAP1D	ABCF1	PAPD4	BTBD3	DYRK1A	SF3B4	CLOCK	TMEM74	PTBP3	5730403I07RIK	SCAMP1	RPP25	RABGAP1L	WNT5A	SETD1B	DYRK1B
BRD3	ANO10	CSNK1G3	ANAPC13	PHTF2	ITPKC	PRTG	CNOT4	MESDC1	LAMA5	RYR2	EXT2	AEBP2	ACER3	9930021J03RIK	9230112D13RIK	SKI	PRSS35	NRF1	FBXO38
BRMS1L	TMEM30A	MN1	MARCH7	TFE3	RCC2	RAP1GAP	OCA2	STMND1	CWC15	ADAM12	NOC4L	ZFP598	CLN5	UVRAG	4930509K18RIK	IFT81	OSBPL3	GM4951	RHNO1
GM15133	SFR1	NEK9	KCTD18	1700129C05RIK	STRIP1	ANAPC2	LRRC8D	NT5DC1	SPATA18	5031425E22RIK	COMTD1	RRBP1	FAM204A	SLC35A1	CDK12	DNAJC15	PRC1	MIEF1	ZFP957
SIK2	JMJD1C	SCHIP1	MINK1	FGD6	LUZP1	FAM160B1	CHTOP	RNF25	MALT1	5330411J11RIK	HTR3A	9130401M01RIK	NAPG	HTR5A	SOCS7	PROM1	MRGPRA4	ESPN	GGACT
RDH14	SIN3B	USP21	KCTD2	DDIT4L	TBCC	ABL2	SP5	CAPSL	D430036J16RIK	GM16796	BMP7	PPP2R5E	SLC37A3	MIR6381	MBP	SLC39A10	GRIK4	LASP1	DYM
TRIM8	ZBTB41	SNAPC1	SUCLA2	STRIP2	MAP4K3	UBE3B	KCTD20	ASIC2	ATMIN	CCT2	HCN4	POLD3	GM9992	SMC2	MARF1	DYRK2	YWHAE	FIP1L1	MCF2L
AFG3L2	ASPH	TACR1	GOSR2	CELF4	SLC25A1	FZD5	AZIN2	ATL3	SEPT11	DPY19L3	USP25	PAPD7	KIF23	CLK3	PAFAH1B3	1500011B03RIK	HERC2	STK35	AI837181
LRRC1	MRPL33	THAP2	SNORD104	UBE2J2	TIMM8B	CWC25	NASP	BRPF1	CDCA5	MTIF2	8430429K09RIK	DYNC1H1	DDX6	MMADHC	L3MBTL2	RPL7A	CHERP	PRKAB1	EHD1
CUL2	MIR6349	CRH	BRCA2	NPY5R	ZFP622	MRPS23	ARHGAP5	RSF1	HBS1L	RRAGA	HGH1	SELT	TRMT61B	1500015A07RIK	MORC3	SNRNP40	EXOSC1	NUP214	SNRPC
TIPIN	ADAT1	RPL36	GAS2L1	PFKM	EIF4A3	GM11974	FKBP3	GPX1	DENR	CDC25A	POLR2D	MTCH2	TM9SF1	FBXW2	NADK	LPHN3	EIF3A	GM10364	VPS37C
PSMD2	XRN1	DERA	BPGM	GTF2IRD2	RPL10A	SRSF5	RBM34	ZFP219	MAPK14	RNF168	CABIN1	DDX39B	ZFP207	BCL2L13	FBXW7	1700123O20RIK	NELFCD	TMPRSS12	FAF2
TRP53INP1	GM11696	FARSA	MTA3	TRMT1L	RPS17	SACM1L	UHRF1	POLH	BUD13	NOSIP	CANX	RPTOR	MAU2	WHSC1L1	PPP6R3	INTS10	NUP133	VAMP3	POLR2M
DPP8	CDC7	GOPC	SUV39H2	LRRC71	KIRREL	PARG	SPC24	KNTC1	HDLBP	IL17D	ZFP397	CCNB1	UNC50	TOMM70A	SEMA4B	GORASP2	FOXD2	IPPK	HPS3
RRM1	PELP1	1700060C20RIK	MRPL52	KIF15	PPM1G	FOXN2	ACLY	VPS37A	CLN8	COG4	KCTD5	PAFAH1B1	1700034F02RIK	MRPS35	RAB40C	GNPTG	PARL	ZNHIT3	CPSF2
POLR3E	HELQ	ZFP157	MROH8	RNF170	COG1	CLSPN	TNPO1	WDR41	PCYOX1L	PCSK9	SNHG7	PRRC2C	EED	CDC42SE2	SPOP	PLBD2	IRF2BP2	EYA3	MIR5127
EFCAB2	ATL1	DNAJB1	JMJD7	VCP	ULK1	STT3B	SPSB3	NDUFS2	FBL	TDRD1	ARID2	ITIH4	NXF1	PCNXL4	2810008D09RIK	SNORA7A	ZSCAN26	PRPF4	C230035I16RIK
SNORD47	TCP1	SEP15	CBX1	OXSR1	NOL11	PRDM4	TET1	WDR78	4930483J18RIK	MECR	CCDC171	FASTKD3	ARHGEF12	TEX2	EGFLAM	SYMPK	1600020E01RIK	CASQ2	SUPT7L
MRPL36	MASP2	PPARD	RNF8	GPBP1L1	ZFYVE27	EXOSC8	CSNK1D	IMPA2	TMEM194B	NATD1	DMTF1	GHITM	DDX50	GRHPR	RAD1	PCF11	NOL10	FAM167A	HNRNPA0
H2AFX	WHAMM	NUBP2	EFHC1	MYH9	1700066M21RIK	D630032N06RIK	APBB3	NECAP2	EIF2S2	CIAPIN1	DTL	G3BP2	NUP93	RSL1D1	MORN1	ENKD1	CNEP1R1	G6PD2	BCAP29
UBA6	OTUD7B	ZFP580	CDADC1	ARHGEF28	NCK2	ID4	MARCKSL1	BBS12	SOCS3	MRPS36	A930001A20RIK	BRWD1	RCE1	SCYL3	4931417E11RIK	UHRF1BP1L	XKR6	ZMAT3	PIBF1
UBN1	WWP1	COLEC12	EPHA2	EGFEM1	NIPBL	NF1	CWF19L1	SH3GL2	2500004C02RIK	ELF2	MBD3L1	TWSG1	NDUFB2	MLLT1	CRB3	FV1	USP28	SLC9A6	A730036I17RIK
4930447A16RIK	MOK	STX16	SNRNP48	PKMYT1	N4BP2L1	H2AFY2	RFX3	MAN2A1	LDB1	CLEC16A	TRP53BP2	RHBDD2	NAA60	SEPT7	ATG4D	ZPLD1	RPS25	MIR6393	CLDN12
MND1	SLC30A1	DLD	RAPH1	STX7	SETD1A	SETD8	PAOX	GM10814	H2AFB3	MYO3B	IL10RB	RIPK2	CCNI	AFF1	SMG7	DNM1L	MARCH1	PTPN3	SLC7A6
AP3S1	PER1	NRD1	SPAST	NFE2L2	PRODH2	SPOCK3	WASL	MXD3	MSH2	FAM86	CDH13	YWHAZ	CDK13	PIK3C2B	MIR17	DLX6	AGO4	ALOX15	GRIA4
ACTL6A	GTF2E1	DCTN2	DDX20	ZNRF1	DUSP23	EIF4G3	GCN1L1	KLHL25	RASA1	1810062O18RIK	SERINC2	SIGMAR1	SYNJ1	RHOG	PLK1	SHPRH	PCYOX1	MIR5130	GTF2A1
NUP50	HPCAL1	C330013F16RIK	BTG3	ZCCHC6	NDRG4	OBSL1	FZD2	SUCO	WBP4	TM9SF3	CECR2	GM6578	ATP8B2	TDP1	YEATS2	ATP2B2	ZBTB24	IDH2	CCM2
NOTUM	DDIT4	SGSM2	BMPR1A	PRKACB	ACVR2A	DOCK2	GRK5	KCTD6	METTL4	FKBP1A	PPP3R2	LRRC3B	4921530L21RIK	UBE2DNL2	CUTC	PHC3	KMT2C	IFNAR2	TBL1X
TTBK2	PHF23	CD81	RP9	MAP10	AFF4	MOB1A	MRPL57	MIR8098	ZFP57	JAK1	BTBD9	NCS1	ATG14	PDZD8	TPD52L1	EXOSC10	RBM17	CASKIN2	SLC25A39
LYSMD4	MED7	5730455P16RIK	D10WSU102E	AI504432	PTPN2	GINM1	4930444M15RIK	DOCK5	TBC1D15	ABCD4	ADRA2A	ATP1A1	GM6793	ASNA1	SLC25A3	SNAPC4	HDGF	BBC3	COX17
TXNRD1	DCK	FEM1B	2310039H08RIK	ZCCHC10	PRPF19	DDX10	GM12669	HMGCS1	TMEM11	PARP11	SLC25A51	TFCP2L1	SGOL2	ATG3	ZFP541	4933405E24RIK	DIMT1	CALM1	PCID2
NMNAT2	PIGQ	NUP85	MYL12A	D130020L05RIK	WDR70	MKRN1	TRAP1	CFDP1	PRPF39	GMNN	SNRPD1	RFC2	GSTA4	PSMD8	CYP51	HN1	SF3A1	SMCHD1	SPRY2
KPNA6	MAP3K4	ESF1	AP1M1	HSPD1	1110037F02RIK	PINX1	COX5A	PIH1D1	FREM3	GGA1	ZFP451	PPAN	TMED4	TTC33	WDR46	STK38	NDUFAF3	PTPN11	UBE2QL1
ZFP106	SLC9A8	POLR1D	NOP14	IPO7	NUP54	BC048403	CIRH1A	NDUFA9	TACO1	INPP5K	HERC1	MEX3B	PPM1N	BMP3	ZDHHC4	UBA2	TCOF1	AJUBA	H2AFV
ZFP507	ZBTB49	GSG2	SPCS2	LPCAT1	MRPS18B	TRMT12	CDC27	2810025M15RIK	LRRC29	ELK4	YKT6	RPL14	KLHL12	CISD2	CNOT10	RBMXL1	API5	UBE2Q1	ABRA
TGFBR2	MYH10	BRAP	TATDN2	SACS	PI4K2B	9330151L19RIK	DUSP1	SNX3	NVL	SLC12A4	YBX1	ZFYVE21	EFR3B	KXD1	HSPA8	ALDOA	LUC7L	CLPX	RPS27A
ZWILCH	USMG5	ZFP672	CYB5D2	CNIH4	WBSCR16	RAB23	SREK1	HSF1	SPPL2B	SEC61G	CPSF4	TAF6	NDUFAF1	SNORA16A	TMEM179B	CD320	XPA	CNTNAP5A	CKS2
PSMA5	UBE2B	MSH3	TBC1D7	ZFP644	CCDC88A	SNW1	GALNT2	SLC15A4	CYPT12	PARP1	UBE2O	GCLC	TRIM62	TAF2	DENND3	GALR3	RBBP4	PURB	PICK1
DLL3	PWP2	TEFM	AUP1	TAOK2	STK39	DSE	FNDC3B	MSTO1	DCAF6	2210408F21RIK	THRAP3	SKOR2	TYSND1	SLC30A6	ZFP809	FAM208B	2410089E03RIK	1700012A03RIK	CHMP7
NDUFB7	CLHC1	CPSF4L	SCRT1	KDM2A	NAP1L4	ADPRHL2	PRR3	ZRANB1	RPL22	ATP5A1	IST1	BAG6	RPL7	E4F1	VPS13D	GAB1	VIMP	DLC1	4930453N24RIK
VPS26B	TRAPPC12	LIMK2	CDC37	WAPAL	TTC13	RPS9	AKT3	LEPROT	SEC23B	4933439C10RIK	TSPYL1	ZFP62	TRAF3IP2	ARCN1	RAPGEF6	NT5C3	CLCN3	DCP1B	2300009A05RIK
TMEM192	ZFP2	GEN1	DUS1L	LPHN1	RC3H1	ARRB2	TSFM	FAM207A	MRPS33	DSCR3	RELT	ALG1	FLYWCH2	DDX55	EXOSC5	SLC38A1	B3GALT6	TOPBP1	SPAG7
CD63	SQSTM1	TOR1B	JAGN1	RPLP0	MYO16	STRAP	VAMP2	UHRF1BP1	CCNF	GEMIN4	EP400	MVB12A	TBC1D31	IMP3	CPN2	AKAP1	AK6	ATF2	CHCHD2
PATZ1	AIMP1	ZFP13	MTF1	TRIM28	RBM8A	RANBP3	RWDD4A	CLTC	HRASLS	PDXDC1	MIR1895	MAPK9	ELL2	PPP2R1B	2810408A11RIK	2700060E02RIK	SPRY4	A630010A05RIK	TMEM53
SHQ1	SERTAD3	ATP2B1	REEP4	SPTAN1	NEDD4L	USP3	IGF2BP2	TMED1	CYTH2	PABPC1	MAP3K1	STXBP5	VPS33B	RCN2	SLC6A6	CTSL	4931408C20RIK	CXADR	MTPN
GLRX2	DOLK	NPNT	MRPS9	MANBA	MARK1	POLR3H	PRB1	RPAP2	TBPL1	UBL3	NUMB	SGK3	TXNL1	SEPHS1	SP3	MTMR9	CRNDE	TGIF2	FAM171A1
PRMT10	PCDH1	BCL2L1	SLC26A1	UBE4B	FAM76A	KDM5C	HIGD1A	0610010K14RIK	CAMTA2	TSC1	ZC3H7B	LMBRD1	LZTFL1	LNX2	INTS1	FERMT1	RNGTT	YIPF5	ITGB5
NEDD1	UBN2	RBM38	HMGXB4	LIN54	ITGA9	SMC3	MARS2	YARS	UBASH3B	TAMM41	PKN2	RPUSD3	ZFP131	ZDHHC21	CGNL1	GALNT3	ADRBK1	ZFP652OS	ASCC3
DISP1	NME2	MIR205	PDE7A	TOB2	TOP1MT	USP4	ABCA2	CAMSAP3	CAMK1D	MCMBP	TNR	RAB3GAP1	SLC25A5	SMIM14	PSME4	MELK	4921511C20RIK	PTCHD3	RQCD1
ERI3	EIF3L	MKRN2	METTL9	ERF	ACTR3B	SAC3D1	CCAR2	CAB39L	SRGAP3	MICAL3	CALN1	SCYL2	PRPF6	GIT2	GNPTAB	PIM3	PPP1R12A	SRP72	ESCO1
TMEM33	SMG5	SRGAP2	PIAS1	PIAS2	SLMO2	4833417C18RIK	KIF5B	SPATA2	SOCS1	VPS29	TES	4930406D18RIK	MAPRE3	RHBDF1	ICMT	RNF126	ABR	ENPP4	RNF145
TOP3A	MCMDC2	3110082I17RIK	PPP6R1	BTBD10	HMGA1-RS1	PDXP	SH2B3	DNAJB11	SNX4	VARS	PTEN	RCAN1	GFOD1	CECR5	PRKAR1A	NT5C3B	TXNDC9	VMN2R85	1700007L15RIK
USF1	DCAF10	ABL1	MTIF3	DCAF11	ACTR3	TROAP	SYNE2	CENPF	1810041L15RIK	2610002J02RIK	TAB1	BRPF3	SLC43A2	ZYG11A	PSMC6	HSD17B12	RASSF10	TBC1D4	NUP205
TSPAN17	AGPAT1	LRRC17	TRIOBP	ABCA7	RCOR1	POLE4	RFTN2	PEX5	IFT88	ING3	ZBTB10	KIF7	GNRH1	KDM3A	PTPRT	FOXK2	FAM134A	DHRS11	TAF4B
UFD1L	RSU1	PCNP	FAM120A	ATF4	EEF1G	MRPL38	ATAD3A	RIOK2	SF3B1	DHCR24	NBEAL1	CCSAP	TOP2A	DDX19A	4933404K08RIK	FBXO25	RPE	BZW2	SEL1L
NFXL1	EFS	PPP1R2	TFRC	PIGW	QK	WDR61	ZFP410	9030624J02RIK	PARD6G	ARL10	RRP15	PASK	FBXL14	FBXL6	POLM	ARFRP1	BTF3	XPO1	ATP6V0B
SSBP1	NSUN2	ORC6	NDUFA2	ZFP827	G2E3	UBR7	PSMA7	CASP8AP2	HNRNPA3	TAF3	RPS7	ARFIP1	CNOT11	SNHG6	TFAM	MTR	TIMM44	IARS2	ANAPC1
HAT1	RNF20	ATP6V0C-PS2	DCP2	RAD54L2	ANKFY1	PATL1	CASP2	ZSCAN25	MTHFD2	NR2F6	AQR	CHCHD10	CLTA	H3F3A	ATXN3	RPRD2	POP5	NOP9	COMMD4
DNMT1	GATC	MAP2K1	KMT2B	ISG20L2	PPP1R37	GNL2	PDF	HADH	ZNHIT6	ELAVL1	MNT	ZNFX1	GM15348	MAN2C1	PRPF4B	SMYD5	YIPF3	TBCK	PEX14
LZTR1	TBX18	NPSR1	FAM196B	MRPS27	PYGO2	LAPTM4B	RBM45	YEATS4	DHRS2	1600012H06RIK	D930007P13RIK	MTMR2	VPS8	SPATA5	TMX3	CREBRF	TENM2	RAB11FIP1	CCNG2
ZFP770	TMEM87B	PCBP2	PLXDC2	IMP4	DDB1	DIABLO	UBR5	RAB10	GPS2	TMEM186	EIF6	KNOP1	KDM4C	ANKLE1	RPL36AL	OGDH	ZBTB40	MIB2	MED8
ZFP664	THADA	CDK6	ZFP787	SUMO2	ELOVL7	NOP56	BTG1	ACTR1B	RC3H2	NDUFB10	GOLGA7	FAM192A	SEPT2	ZFP101	RAB4A	PSMC3	TOMM7	CHCHD5	GNB1
MDH2	ACTN4	SRPRB	COPS7B	SNIP1	SLC25A17	C1QBP	DDX39	B230219D22RIK	ANXA1	KANSL1L	NRXN3	SUDS3	KMT2E	ISYNA1	THAP11	POLR2C	RAD21	UBAP2	QRICH1
KDM7A	NLE1	2310057M21RIK	MRRF	NXT1	USP32	ZDHHC20	BAP1	PCSK7	SNRPA1	YES1	BLOC1S4	ZDHHC16	HSPE1	NEK1	HMOX2	HSDL2	ZKSCAN8	DCTN5	AAED1
NAIP5	AAGAB	TXNDC15	TNFRSF18	SLC25A32	KTI12	A830018L16RIK	ZCCHC4	CHFR	MCM3	ZC3H13	ZFP830	RABGGTB	IREB2	SNRPE	2810004N23RIK	DDX27	ABI1	EFTUD2	QARS
ZFP148	NUP153	PDCD2	TPRA1	DHX30	DBR1	MAP2K7	CDK7	TCF3	CDK10	CCNE2	CHTF18	LMF1	PNO1	STK40	AQP11	NOP16	HCFC1	TBC1D30	PHLDA3
TLK1	PLK4	ZNF512B	STUB1	BRF1	ERLIN1	SNX2	GSTZ1	TMPPE	EIF1B	EEFSEC	GLTSCR1L	GADD45B	SH3PXD2A	PPM1B	STXBP3B	ATP6V1A	TMEM263	F13A1	PMPCA
FZD4	MRPL11	DUS4L	CWC22	MORN2	LSM5	UPF3A	CKAP5	FAIM	CAPN2	XPR1	RHBDF2	BC051226	TIAL1	ZFP82	JTB	OGT	DDIAS	SLC20A1	RPL38
SNORD49B	A330009N23RIK	CCAR1	KPNB1	HOMEZ	SIVA1	MOB1B	2210018M11RIK	IPO8	RIOK3	ZFP296	LRRC59	RBPMS2	ARIH1	OTUD6B	2310022B05RIK	TYW3	RBBP5	TADA2B	GLT1D1
NUDC	RCL1	SKAP2	POMGNT2	SYNGR2	PPIL1	ATG16L1	TBC1D10A	GLT25D1	RHOT1	STK25	MED18	KLHL21	EAF1	PES1	PUS7	BSG	ZRANB3	SENP3	CHEK2
GET4	VWA8	NDUFA12	CGRRF1	TRP53COR1	USP10	GTF2F2	KCTD13	CNTN3	KLF3	SLC23A2	PHIP	CDK2	NAGLU	ARMC10	NELL1	HLX	ORAI1	TMEM158	MYO9A
ZMYND11	CAMKV	ASTN1	KCMF1	2700081O15RIK	SMAD6	2510039O18RIK	PACS1	RECK	RAPGEF5	ITGA5	SPG11	RALGAPB	ARF2	ANP32B	AMPD2	WFS1	CAR12	DPH2	MNAT1
MIR199B	OXR1	SLC44A1	KCNN2	PSMD6	RSL24D1	NPHS1OS	ATP2C1	1700061I17RIK	MOB3C	ZYG11B	ZDHHC17	PIGN	UBE2Z	ATP9B	ELP3	MRGBP	EAF2	SPINT1	JAM3
EMB	CHST8	CALCR	DYNLRB1	ZC3H6	APP	RAC1	BRI3BP	CROT	ANKRD1	SIX1	FKRP	DNA2	VEZF1	FRMD6	PABPC4L	NSUN6	NEK6	ENDOG	BC004004
DUSP8	CLASP2	UNC5B	TSEN15	TBC1D2	MIB1	FUNDC1	ALKBH5	PTPRS	CERS2	CTNNA3	DRAXIN	CCNE1	FZD10	MAPK12	PKD2	MED4	SBK1	PCCA	4732491K20RIK
YIPF7	GTF2H2	DNAH11	REV1	COMMD3	GNG5	PEF1	USF2	PDE5A	C78339	ABLIM3	NET1	BNIP3L	INAFM1	DGKD	CDKN1A	EPC2	GDF1	ARHGEF2	WDTC1
USB1	GDPD1	PTPRF	CENPC1	ELP2	PRRC2B	STARD6	8030462N17RIK	4930506C21RIK	CCDC93	CYFIP1	SMARCE1	CEP63	LRTM2	ARHGAP29	4930525G20RIK	NFKBIA	SNX10	RBL1	1700020I14RIK
SLC16A9	NOTCH2	KMT2A	HIST1H4K	GM14812	KIF21B	BUB3	9630028H03RIK	HES6	TMEM132COS	TACC2	ZFP212	PRDM15	NABP2	4930505G20RIK	UCKL1	MRPL16	LRRC16A	CD2AP	BNIP3
CIZ1	ZBED4	SOX14	MARCH6	LRP5	DPY30	SIPA1	CEP350	HELZ	CHST14	GBF1	CXXC1	RABGEF1	TMEM194	MIRLET7I	PINK1	PUM2	MAPK1IP1L	NDFIP2	BCAS1OS2
CAMK2N2	PKP4	LEPRE1	A130010J15RIK	HMGA2	MIR5119	NUDT2	HINT2	PLLP	FGFR2	ARHGEF10	SLK	CCDC9	SLC38A4	SBF2	TCP11L1	PDE4DIP	ATG5	TMX4	SPAG4
ANP32A	BDNF	TLCD1	OSBPL11	LARP4	SSH2	TARS2	MIER3	B3GALT2	MALL	NCKIPSD	ABCB11	BNIP1	AMMECR1L	SMO	DDX1	ZBTB5	WDYHV1	9130024F11RIK	DXO
BTBD6	TASP1	CXCR1	SETD3	WDFY1	WDR1	TMEM120B	MAB21L1	VAV2	TWF2	SLC35F3	ATRIP	MIR5113	DZIP3	ZFP459	MRPL2	ARHGAP19	PPA1	FUT9	FNBP1L
PTCD1	AHCTF1	VTI1A	GM12409	CEP85	MRPL55	LRRCC1	MRPS30	USP19	AKR1A1	VPS9D1	SCOC	SAAL1	NCK1	CNPY4	RPS4L	MDN1	PSMB1	NUDCD3	DRG2
TMEM223	LARS2	ATG2B	PPP1R10	GINS4	LATS1	GMCL1	CHMP5	ASPM	GPC5	ZRSR1	SQLE	SLC16A10	CASC4	TRPM7	POC5	SMARCAD1	STK4	WDR43	PDIA6
MIR1956	EIF3B	4933430I17RIK	EXOSC7	CEP78	GARS	FASN	MCM5	PRDX6	RPL35A	1110038B12RIK	CC2D1B	RPL6	RPLP2	RPL37	BCAS2	SLC38A8	DNAJA2	ZPR1	RAB11A
MTMR12	SYF2	AK4	NMT1	RBKS	GLTSCR2	DSTN	MED1	1110001J03RIK	CCDC97	ASAH1	PICALM	GM20604	OST4	3110043O21RIK	SS18L1	ROMO1	PPP2R5C	POLR3C	TSTD3
TMEM147	RAB5C	LSM1	BYSL	KDELC1	FAM96B	ARHGEF7	PRKCI	IRS2	COX20	CREBZF	PDAP1	C2CD5	4632427E13RIK	BAX	KBTBD2	SPEER4C	SMOX	DYNLL2	OGFR
SLX4	FAM76B	USP45	RB1CC1	EXOC6B	PSMD4	ZC3H15	F11R	COMMD9	ZFP322A	MIR5106	6330549D23RIK	NUP107	MLF2	SAR1B	FAM21	2510003E04RIK	BC055324	ANLN	SARAF
CALR	POMT1	PTGER2	CEP57	SGTA	KIF11	CEP152	DAAM1	RABL6	2700038G22RIK	CBX7	NDUFA8	ST13	RTF1	4931406C07RIK	MEX3C	ABHD12	XPNPEP1	ZFP763	DPH5
AARSD1	PSMA1	RBM6	CHMP1A	SMN1	MCRS1	PDIA4	PRPF31	SH3BP5L	TNPO2	MYL6	DENND1A	TUBGCP2	LMBR1L	PDLIM5	CHSY1	CARHSP1	1190007I07RIK	LACE1	TNFRSF21
PPCS	ACAT2	2410017I17RIK	SCAF8	USP38	GLI2	MFAP3L	SLC7A5	COX18	LTV1	MAP3K2	ZCCHC11	YOD1	DTWD1	RBX1	NDUFA3	SKA1	DAZAP1	PSMB7	5430405H02RIK
CCNK	ZKSCAN1	TINF2	ST6GALNAC6	EIF3D	CIRBP	FAM185A	0610040F04RIK	GOLGA4	UCK2	LEO1	TDP2	REXO4	TAF5L	NSL1	SPC25	4933408J17RIK	ZFP408	UQCC3	POLR2J
AMIGO2	SLC43A1	CFAP20	CORO7	GLT8D1	LRP2	ITPK1	NELFB	DLGAP2	WASF2	TIMM23	POU3F1	ZFP39	GNA11	6430573F11RIK	MTERF4	DDX21	UQCRC2	4833420G17RIK	FOXRED1
RPA2	UBE2N	BLM	CLPP	NIPSNAP1	PRELID1	MTA2	ZFP617	RPL18A	HNRNPM	USP22	GTF3C2	MTHFSD	COPS4	CFAP97	ADPRH	METTL3	SLC35E3	3110021A11RIK	ZC3H4
ULK3	SEMA4C	CUX2	RGS16	RBBP6	CRAMP1L	NRBF2	SP1	ANKRD13A	NFIL3	LONP2	CALM3	SCUBE3	LRRC56	ZFP358	RNF38	ZFP251	ANKRD28	NUDT1	CFL2
EMC2	SIMC1	MRPL19	ICA1	DCAF17	NSD1	PCSK5	STOM	CDC42EP4	DCXR	TXLNA	CACNA1A	HARS	LHPP	FGD4	MIR6335	ZC3H18	ZFP462	PAPOLG	HAUS6
SEC61A2	UGGT1	PTPN23	U2AF2	INTS4	NCSTN	VPS28	SNHG5	KREMEN1	GNAI3	PSEN1	ACTR8	SCAF11	CDKN1C	DDOST	SARNP	CRTAC1	CD47	MIR7045	PPDPF
SPCS1	FXN	DCTD	SPTB	ATP11B	RBBP7	SMYD2	DEDD2	PAXIP1	CADM4	ETFA	RPAP3	SUN2	ULK4	ZDHHC14	FARS2	RNF31	MLLT10	MAP1B	FOXO6
MTA1	ZFP128	FNIP1	TYW5	TBC1D22B	ZFP704	SLC9A3	CREB1	TBC1D22A	PPFIBP1	DLGAP4	DOCK1	SLC6A9	SLC12A6	DOCK7	VPS37B	LRRFIP1	DYX1C1	FAM168A	SRRD
PTPLB	KCTD15	RELN	PEX7	HIRIP3	ALG5	LONRF1	CENPB	FAM3C	2610008E11RIK	LEMD3	A230009B12RIK	TMOD3	STMN1	SPDL1	ARHGAP23	CDK1	B4GALNT1	CAPRIN2	FMNL2
BCL11B	MPC1	FILIP1L	E2F6	VPREB2	EIF5B	WIPF1	GPD1L	TBC1D12	STX11	LARGE	ZIC3	TRAF3IP1	SURF4	SON	WWP2	UBAP1	SMARCD1	UAP1	KLHL9
AWAT2	CHKB	DPP10	LIG3	RAB34	MAP4	VPS53	TBC1D9B	KLHL5	NLN	MAST1	ALAD	MINA	SLC9A3R1	FRAT2	9930014A18RIK	SMDT1	ACBD6	PPARGC1B	RNASE12
ADNP2	SMIM4	NUCKS1	1700019G24RIK	PCX	CYLC2	SAMD4B	ACSL1	MAEA	HEATR2	SECISBP2L	SCAMP5	ZFP592	ADRB3	PDE3A	LDLRAD4	ARHGEF5	NUDT18	FERMT2	KPNA3
ZFP865	ARID1B	PIGYL	UFSP1	PELI2	NR2C1	GPCPD1	TTC4	RASSF3	FZD9	CELSR2	MPP5	USP42	SBF1	1110007C09RIK	RNF157	NFKB1	RAB28	TRIM2	WDR26
ATP6V1G1	PHACTR4	RGL2	UNC119	PIGP	RGS12	1810009A15RIK	BCL6	ZFP771	DOK4	SLC19A3	AUH	KCNG1	PGM1	MARCH5	STX18	NHLRC4	CTNNBL1	SPPL2A	CYB5R4
SGSM3	HDAC2	TSPAN3	ZFP341	SNRK	RAD50	STAM2	TMEM127	LRRC16B	RB1	MEF2D	DGCR2	PEPD	4932412D23RIK	CBX2	9430020K01RIK	FBN2	PIGC	SLC27A3	FAM208A
CDC23	AMBRA1	UBE2A	RTKN2	EYA1	TMEM40	4933415F23RIK	AHR	BHLHE22	DENND2A	BLNK	ZFP407	MAPK7	USP43	WAC	PHTF1OS	RILPL2	GLCCI1	EMILIN3	BMP2K
MIR2136	SYCE2	SERINC5	NSF	NXPH3	FAM78A	2810429I04RIK	MTL5	JAG1	HERC3	ITPR1	ZDHHC5	A230046K03RIK	AGRN	THOC2	HAUS8	MAP3K6	RICTOR	ADCY1	FNDC9
PRR14	BC005561	MIR22HG	PPIE	CAMK2D	ATE1	DISC1	AGTPBP1	CRYBA2	DAD1	RNF149	B3GAT3	POT1B	BC003331	PNP2	RCOR3	SDF2L1	NFKBID	ACCSL	PRKRA
ZFP821	ADRB2	STEAP1	CCNH	CCDC112	CENPU	MIR1901	GABBR1	RBM28	COQ5	MRPL44	TXN2	2310047M10RIK	KIF1B	TFDP1	UQCRC1	GTF2F1	TAOK1	GNPDA1	GLS2
MOB3B	MIR291A	TIMM10	TRIP12	NMD3	CMTM6	2810474O19RIK	CHUK	DDX46	CCDC28A	RTN4	SIRPA	CMTM4	WDR83	TXN1	FAM209	SNHG4	AAAS	RPL11	ATP5J2
SMARCA4	PIGH	RDH13	NAA20	CARM1	PTK7	MCM2	ZFP382	DHX16	MRPL37	FBXO7	METTL17	SLC35E2	NDUFAF2	LMAN2	RPL21	TRMT11	GRAMD3	DPM1	SNORD49A
RPL24	CCDC86	ZFP329	KLC1	IFT20	PSMB5	DOT1L	PIEZO1	HNRNPAB	DHDH	MYPOP	TRMT5	ZFP184	FBXO5	YAE1D1	CAPNS1	EFNA4	PUS10	MT2	DROSHA
DIEXF	ANGEL1	TCP11L2	CHMP3	CLASRP	HMGCL	TBRG4	HERPUD2	MAT2B	GTSE1	NEDD4	MTMR4	ATAD1	CEP55	VWA9	JMY	TKT	TBCA	RTFDC1	POR
MAP1S	KIF24	EPG5	NKIRAS2	ERCC5	TRIM11	2010107E04RIK	LYAR	EXTL3	PIP5K1A	MRPL46	HN1L	EIF3K	HDAC1	TUBGCP5	PAK1IP1	FIG4	SF3B5	ROGDI	9130023H24RIK
ZFP26	SUGP1	CDCA8	AFG3L1	CEP250	2410016O06RIK	KLHL18	WDR76	RRP1B	PIP4K2B	DST	DMXL1	ATF6	OLIG1	WDR33	EML3	DOCK6	PFAS	SLC27A4	HIST2H2AB
SPG7	RUVBL2	DAP3	UBE2M	FAM206A	TRIB1	RBM26	SIN3A	ZFP688	CNNM3	CHPF2	ZFP324	ZFP947	DHRS13	TCF7L2	EZH2	TPD52	CLASP1	LIN37	2310001K24RIK
GCH1	UBE2T	ALKBH3	SAPCD2	UVSSA	CNN3	MRPS11	LEMD1	SH3BP1	DEDD	SRP68	COX6B1	GM14393	CSMD1	IRF2BPL	NDUFV3	ARHGAP39	VPS39	MPV17L2	TRNT1
RFNG	GLUD1	ZNHIT2	THOC5	RCHY1	MAP2K3	SEMA3E	AKAP13	RPA1	WDR75	SGOL1	NEK2	POLR2E	CDC20	MYO6	NARS	EXOSC3	MRPL20	PSPC1	CAMTA1
HEXIM1	SZT2	TUBA1A	HLCS	EME2	INO80B	PIP5K1C	BORA	GFPT1	CENPH	FAM222B	GM17296	LRIG2	NOMO1	TULP3	PSMB4	CAMSAP2	NCOA3	RTCB	LMBRD2
THUMPD1	1190002N15RIK	EIF2B4	INTS7	PCGF6	CDK5RAP3	PARK7	CLCN6	TCEB1	COPG1	GPATCH3	NAPEPLD	GM11565	NAPRT	VANGL1	SPRED3	RAD23B	MOB4	CHCHD3	ACTR2
GEMIN6	LARP6	SDR9C7	PDIA5	KLHL8	SNTA1	APLP2	CCDC77	HSPG2	ST3GAL3	GRIA1	ECI1	KDM5A	A930006K02RIK	ARFGAP1	UBE3C	MGAT5B	PPP1R1A	IDI2	COPS8
TOP3B	FKTN	TOMM22	ZFP12	IDH3B	PXYLP1	CCT5	PEX12	TRAT1	PITHD1	LRRC8A	MALSU1	SNHG11	EIF4A1	5430416N02RIK	POLR2G	DSCC1	NXPE3	PAM16	MTO1
IFT74	FBXO36	BRK1	BCDIN3D	D8ERTD738E	BRF2	OLA1	ZC3H7A	SLC7A6OS	ZKSCAN17	ZMYM2	ATAD5	CSRP2BP	TACC1	RNF215	BDP1	MUS81	TMA7	R3HDM1	USP39
D2WSU81E	TUBA1B	PTGES3L	RER1	1810055G02RIK	SDHB	PYCR2	MTAP	COL18A1	SLC1A2	4931440P22RIK	PHLPP2	TRIB2	SHOC2	SPPL3	LCA5L	HEATR5B	KLRG2	GPC1	TGOLN1
ZXDC	EIF2B2	IL17F	PER3	TSC22D2	PCNX	ATP5J	NRG1	GLI3	GNPDA2	ZFP316	GRM4	RIMKLA	DGKZ	METTL1	TTC9	NDUFB6	TMED8	FKBP9	HSCB
RFK	HIRA	PHF20L1	VHL	NR1D2	CRELD2	KCNIP4	NADK2	CISD1	BLOC1S6	GKAP1	UGP2	ZDHHC12	GLS	RASSF8	SLC16A7	BC002163	MEGF8	B4GALT1	ZFP398
RNF122	ARPC1A	FOSL2	SPEN	DNAJB5	RCBTB1	CACNG5	AKAP2	PAFAH1B2	TRIM26	FAM63B	RGS9BP	ZFP36L2	SCGB2B26	MAPRE1	SH3RF1	JMJD4	ACADSB	APBA3	PROSER1
TM9SF4	AGAP1	ELF1	ZFP292	GM15413	NHLRC2	TOR1A	FRK	FSD1L	NEK7	NCAPG2	ZFP423	KCNMA1	MIDN	CDPF1	PRMT3	FAM219B	AXIN1	4933412E24RIK	MLLT6
MACROD2	DMRT2	PRKAB2	NUDT6	STPG2	MAN1C1	CDC14A	HMGN3	COQ10B	EDN2	RDX	ADCY9	NFX1	HIATL1	ZFP281	PUS3	PLOD3	PNPLA8	MIER1	ELMSAN1
WSCD1	DCUN1D5	OLFR913	DFFB	TMEFF1	NKD1	EDEM3	PACS2	SLC25A16	EARS2	3100003L05RIK	CBLB	ABCB6	ANKRD13C	L3MBTL1	GAPVD1	NT5C	VARS2	FBXL16	UIMC1
STX2	MYO1C	1190002F15RIK	PISD	MBOAT2	HMGB1	NPRL3	EVI5	KHSRP	ACBD3	CPNE3	SNX19	SMC6	GUF1	ZFP706	MYO1E	IER5L	2410127L17RIK	TNK2	SPINK4
AXIN2	LYSMD2	PAQR7	SSFA2	ARFGEF2	PPM1E	KDM4A	RAB6B	F2R	ERC1	OXA1L	ACIN1	AMH	FAM135A	ZFP628	E130102H24RIK	C2CD2	ERP44	LSM8	GTF3A
SKINT7	GM11351	WDR48	MYO1D	CSNK1A1	LSR	HOXA1	DRAM2	0610040B10RIK	CTTN	HECTD3	TBKBP1	VAT1	GPRIN2	MTURN	PUSL1	ACOT10	NBN	THRB	DBP
ERRFI1	OLFR1054	ASAP1	UBR3	PREB	SDHAF1	1810022K09RIK	POLR3D	APMAP	POLL	GCFC2	2010111I01RIK	TANK	DSTYK	POLR3G	MTG2	CCDC117	BOK	SUPT6	TADA2A
MYBBP1A	GOT1	RFWD3	YRDC	NDUFS3	CSE1L	ESYT1	IBA57	QSOX2	TCEA1	CDYL2	R3HCC1	CNOT7	POLDIP2	NDUFB9	FOXO3	MYO10	PAN2	TPST1	PNPT1
LYRM4	GTF2H5	COTL1	VPRBP	SP4	CEP104	SMARCD2	TDRD3	CS	COPB2	DDX49	LIN52	ZNRD1AS	SKIV2L2	EXOC2	NPM3	DUSP11	CAPN7	WDR73	MPV17L
OTUD3	NOLC1	SF3A3	GIPC1	ZCCHC3	TBP	JMJD6	ZCCHC9	WBP1L	2310011J03RIK	HABP4	PLA2G5	CNBD2	SLC35B3	AEN	2310033P09RIK	TMEM123	AKIP1	KDELR2	COPRS
RIOK1	HOOK2	MFN2	1700001G11RIK	EMC4	SERBP1	USP44	HFE2	FAM53C	HIPK3	PRMT6	ACP2	LTBP1	ACTN1	PRPF40A	USP36	AMPH	FAHD1	FBXL4	ARHGAP44
ARID4A	ACBD5	PKP2	ZFP386	CCDC66	LYPLA2	MRPL40	CEP95	SPATA6	VPS18	KSR1	FBXL15	TMEM132A	TMEM51OS1	SETD2	TSNAX	LRRC14	RPAP1	COG2	TECR
NUDCD2	GTF3C1	PRR14L	VMN1R76	TRMT1	BLOC1S5	FPGS	SHKBP1	NESPAS	SETD7	ASF1A	PIGB	TBC1D23	RAB12	SORCS3	AP2A1	FBXL18	VTI1B	CEP83	WIBG
GART	ARL6IP1	SMEK1	GPATCH4	CEP76	PAF1	ZFP143	IDI1	PGGT1B	GPALPP1	CRAT	NOL6	EPHB3	RCAN3	STAT2	MARS	CRISP4	TBC1D1	ITM2B	CPB2
PGD	FAM227A	APPL2	BMYC	2610301B20RIK	SECISBP2	NTPCR	4930441J16RIK	RPL30	B4GALT6	NCOA2	METTL23	SFXN3	EEF2K	MFSD12	SOWAHC	SDR16C5	GARNL3	RFC1	PLCD1
FBRS	RAD54B	KLC2	AW549877	NAA35	EDF1	ZFP418	DCAF7	TMEM41B	TIMM17A	EEF1B2	SSRP1	COPS5	BCL7B	SF3B6	S1PR2	ESD	MKRN3	SPATS2L	SMAD3
ARL15	FN1	MAPK1IP1	RPS2	KIF5C	RAP1A	PMP22	RSRC2	BC003965	LMBR1	BCAS3	GPR179	USP1	AP2B1	ATP2A2	NBAS	MIR130A	FARSB	NSUN5	TMED2
PPP1R15A	GPR88	FAM110A	ISM1	TSSK6	SLC25A15	DPYSL2	DOPEY2	FAM117B	SOX6	STRBP	POLG	HYLS1	HDAC4	GDAP2	WSB2	LPAR2	B630005N14RIK	MACF1	STK24
1110004E09RIK	SNRNP200	MIR6237	RBM15B	MYBL1	FBXO3	RXRA	DLST	OGFRL1	STYXL1	PTPN14	DRAP1	SRSF6	MDC1	CACNB4	MAGI3	KATNBL1	SOS2	HRH3	SCRN2
DLL4	POLR3A	TOR1AIP2	FAM110B	SLCO5A1	MIR23A	ARL2BP	E2F2	SLC41A1	KIF16B	ATP13A2	SPSB1	RIMS3	SPAG5	RAI14	RUSC1	TRAPPC4	1500017E21RIK	NUDT16	TANC1
MAP3K9	MRPS22	IER5	FAM102A	YTHDC2	NTAN1	FAM175A	METTL25	GM15800	RNPEP	CYTH3	ZFP707	MEAF6	SPATS2	MPP2	GALNT9	MADD	MIR9-3	POC1B	LPCAT4
PFDN1	CASD1	FAM178A	TBC1D16	NAA40	NEK4	CKB	4921504A21RIK	CAMK2B	FBXW4	IFITM2	ACAD12	TUBGCP6	FDX1	UNC13B	ITPR2	IDUA	NRGN	SLC4A2	KDM6B
FLCN	PSIP1	ZDBF2	SUPT3	PAPD5	TERT	EXD2	TSPAN14	SPHK2	HOXD12	FAM98C	TPI1	4933433G15RIK	ARHGAP11A	TOMM40	CHD8	ANKRD46	CARKD	THOC1	SLC3A2
MDM4	SLU7	MRPS15	RBM5	CD6	PHC1	FDX1L	DNM1	TNFRSF22	CORO2B	SRP9	PALLD	SLX1B	TST	POLD2	MTFR1	NCOR2	YIF1B	METAP1	TRNAU1AP
PPM1D	NAA16	1110065P20RIK	UBA3	EIF1	GM12530	TTYH2	ATP1B3	ASNS	MKL1	TNFAIP1	SLC35F6	MIPOL1	CRTC2	CD164	MCOLN1	BABAM1	SLC37A4	GTF2E2	PRPF8
DDX47	UTP6	NUP155	PANK2	LSM2	FEN1	TPX2	ADCK2	PIAS3	ADAL	AGPAT2	ZFP568	RWDD1	SPR	IRS1	CTSA	CORO1C	COA6	YBX3	PDCD7
RAB7	NOL8	POLR1C	SYVN1	USP40	MAZ	ZFP142	MRPL35	PQLC1	SCAMP4	TMX2	MXRA7	MRPL23	REL	RHOBTB3	RNU7	RFESD	EXOC8	LDLR	STIM2
PIK3R2	LRRFIP2	THOC3	GANAB	TOMM6OS	RYK	WDR45B	TWF1	FTO	TBCD	SLC7A7	CCL25	CIAO1	OSTC	RAD9A	MBLAC1	VMN1R56	CDKAL1	MSMO1	UCK1
MRPS34	DEGS1	FTH1	SRM	CLK2	CHL1	SCAI	IAH1	4930596D02RIK	KCTD12	A930007I19RIK	SAR1A	SPDYA	SAMD1	CNOT6L	AW554918	NUAK1	CPSF1	PNRC2	FADS2
HYOU1	WBSCR27	NOP2	NUDT4	EOGT	MTHFD1L	ATG16L2	SDC1	DOK1	CSN1S2A	FAM35A	INO80D	DAB2IP	MFSD7B	FAM64A	BARHL2	ANKRD50	CRIM1	SFMBT1	MIR6376
ZBTB38	TEX21	PTCD3	LPGAT1	ANO1	ORMDL1	SLC35F5	KCTD10	4930447C04RIK	KDM4B	UBQLN4	CLINT1	DTNBP1	GPR135	AMOTL1	MIER2	N6AMT2	GM1673	S100PBP	EXOSC9
KIF13A	OSBPL6	SLC26A9	RAD52	CASP9	ARL5A	SYT14	STMN3	EIF5A2	RNF19A	HMGN2	NAA30	PRDM2	SULT2A7	SPTLC1	CNTRL	UGGT2	ETV3	POLQ	CARD10
NOC2L	GM11437	RAB8B	YTHDF1	PDCD11	5830418K08RIK	2810408I11RIK	ZFP346	ALS2	SOD2	EXOSC2	PPM1F	SUPT20	ZC3H14	SSSCA1	TRIP4	MED6	FGFR1OP2	CENPA	SLC38A9
ALAS1	MTUS1	POM121	FOCAD	OMA1	TRAIP	ZFP110	SDE2	4931403E22RIK	GUCD1	COPB1	STOML2	RPS12	SNHG12	HARBI1	DIS3L2	TYW1	BARD1	MARVELD1	AURKAIP1
2016-09-09	ABI2	ATP11A	LRRC51	FLYWCH1	FBLIM1	LZIC	2310009A05RIK	TTC27	MANBAL	RABEP1	POMC	RBM48	CCDC102A	FCGR4	RNF182	IMMT	GPR98	KLHL15	ADAMTS7
MAP6D1	ATP8B1	NUDCD1	DEF8	BLOC1S1	MRPS18A	SLC35F2	WBSCR22	MED11	RPF1	MRPL28	ENTPD6	RTN4IP1	CCDC84	TNKS	NBEAL2	ABHD17A	TCEB2	MFSD5	NCAPD3
PLTP	DUS2	CTR9
Unique RA diff. day 14	N=881
ENSMUSG00000000126	ENSMUSG00000000402	ENSMUSG00000000530	ENSMUSG00000000594	ENSMUSG00000000730	ENSMUSG00000001281	ENSMUSG00000001348
ENSMUSG00000001349	ENSMUSG00000001763	ENSMUSG00000001930	ENSMUSG00000002190	ENSMUSG00000002688	ENSMUSG00000003452	ENSMUSG00000003526
ENSMUSG00000004864	ENSMUSG00000004885	ENSMUSG00000005125	ENSMUSG00000005672	ENSMUSG00000005681	ENSMUSG00000006313	ENSMUSG00000006342
ENSMUSG00000006641	ENSMUSG00000007034	ENSMUSG00000007097	ENSMUSG00000007655	ENSMUSG00000009075	ENSMUSG00000009248	ENSMUSG00000009670
ENSMUSG00000010064	ENSMUSG00000010592	ENSMUSG00000013418	ENSMUSG00000014361	ENSMUSG00000015027	ENSMUSG00000015134	ENSMUSG00000015709
ENSMUSG00000016239	ENSMUSG00000017639	ENSMUSG00000017697	ENSMUSG00000017817	ENSMUSG00000018569	ENSMUSG00000018830	ENSMUSG00000018986
ENSMUSG00000019564	ENSMUSG00000019767	ENSMUSG00000019817	ENSMUSG00000019846	ENSMUSG00000020122	ENSMUSG00000020331	ENSMUSG00000020363
ENSMUSG00000020681	ENSMUSG00000020709	ENSMUSG00000020774	ENSMUSG00000020836	ENSMUSG00000020875	ENSMUSG00000020950	ENSMUSG00000021047
ENSMUSG00000021069	ENSMUSG00000021294	ENSMUSG00000021364	ENSMUSG00000021451	ENSMUSG00000021591	ENSMUSG00000021594	ENSMUSG00000021676
ENSMUSG00000021725	ENSMUSG00000021822	ENSMUSG00000021831	ENSMUSG00000021944	ENSMUSG00000021998	ENSMUSG00000022018	ENSMUSG00000022037
ENSMUSG00000022055	ENSMUSG00000022096	ENSMUSG00000022102	ENSMUSG00000022206	ENSMUSG00000022218	ENSMUSG00000022332	ENSMUSG00000022438
ENSMUSG00000022505	ENSMUSG00000022871	ENSMUSG00000023043	ENSMUSG00000023484	ENSMUSG00000023572	ENSMUSG00000023886	ENSMUSG00000023906
ENSMUSG00000023942	ENSMUSG00000024014	ENSMUSG00000024030	ENSMUSG00000024391	ENSMUSG00000024617	ENSMUSG00000024621	ENSMUSG00000024738
ENSMUSG00000024778	ENSMUSG00000024805	ENSMUSG00000024910	ENSMUSG00000024935	ENSMUSG00000025277	ENSMUSG00000025504	ENSMUSG00000025586
ENSMUSG00000025810	ENSMUSG00000025813	ENSMUSG00000025885	ENSMUSG00000026110	ENSMUSG00000026208	ENSMUSG00000026255	ENSMUSG00000026418
ENSMUSG00000026435	ENSMUSG00000026483	ENSMUSG00000026564	ENSMUSG00000026576	ENSMUSG00000026640	ENSMUSG00000026688	ENSMUSG00000026821
ENSMUSG00000026873	ENSMUSG00000026979	ENSMUSG00000027082	ENSMUSG00000027111	ENSMUSG00000027297	ENSMUSG00000027611	ENSMUSG00000027669
ENSMUSG00000027794	ENSMUSG00000028035	ENSMUSG00000028064	ENSMUSG00000028108	ENSMUSG00000028179	ENSMUSG00000028439	ENSMUSG00000028464
ENSMUSG00000028591	ENSMUSG00000028626	ENSMUSG00000028671	ENSMUSG00000028795	ENSMUSG00000028836	ENSMUSG00000028838	ENSMUSG00000028995
ENSMUSG00000029032	ENSMUSG00000029082	ENSMUSG00000029120	ENSMUSG00000029223	ENSMUSG00000029322	ENSMUSG00000029359	ENSMUSG00000029413
ENSMUSG00000029602	ENSMUSG00000029603	ENSMUSG00000029659	ENSMUSG00000029994	ENSMUSG00000030067	ENSMUSG00000030256	ENSMUSG00000030494
ENSMUSG00000030559	ENSMUSG00000030638	ENSMUSG00000030669	ENSMUSG00000030792	ENSMUSG00000031165	ENSMUSG00000031207	ENSMUSG00000031216
ENSMUSG00000031373	ENSMUSG00000031383	ENSMUSG00000031651	ENSMUSG00000031785	ENSMUSG00000031803	ENSMUSG00000031910	ENSMUSG00000031937
ENSMUSG00000031965	ENSMUSG00000031994	ENSMUSG00000032024	ENSMUSG00000032085	ENSMUSG00000032291	ENSMUSG00000032322	ENSMUSG00000032359
ENSMUSG00000032487	ENSMUSG00000032494	ENSMUSG00000032796	ENSMUSG00000033032	ENSMUSG00000033060	ENSMUSG00000033066	ENSMUSG00000033174
ENSMUSG00000033213	ENSMUSG00000033610	ENSMUSG00000034040	ENSMUSG00000034258	ENSMUSG00000034320	ENSMUSG00000034416	ENSMUSG00000034486
ENSMUSG00000034613	ENSMUSG00000034684	ENSMUSG00000034758	ENSMUSG00000034947	ENSMUSG00000035000	ENSMUSG00000035283	ENSMUSG00000035356
ENSMUSG00000035498	ENSMUSG00000035504	ENSMUSG00000035557	ENSMUSG00000035697	ENSMUSG00000035783	ENSMUSG00000036242	ENSMUSG00000036446
ENSMUSG00000037033	ENSMUSG00000037139	ENSMUSG00000037279	ENSMUSG00000037280	ENSMUSG00000037295	ENSMUSG00000037440	ENSMUSG00000037686
ENSMUSG00000037989	ENSMUSG00000038151	ENSMUSG00000038239	ENSMUSG00000038264	ENSMUSG00000038508	ENSMUSG00000038576	ENSMUSG00000038600
ENSMUSG00000038775	ENSMUSG00000038843	ENSMUSG00000038859	ENSMUSG00000039116	ENSMUSG00000039209	ENSMUSG00000039238	ENSMUSG00000039252
ENSMUSG00000039347	ENSMUSG00000039616	ENSMUSG00000039716	ENSMUSG00000040133	ENSMUSG00000040152	ENSMUSG00000040345	ENSMUSG00000040434
ENSMUSG00000040498	ENSMUSG00000040564	ENSMUSG00000040703	ENSMUSG00000041119	ENSMUSG00000041287	ENSMUSG00000041323	ENSMUSG00000041577
ENSMUSG00000042035	ENSMUSG00000042099	ENSMUSG00000042129	ENSMUSG00000042228	ENSMUSG00000042357	ENSMUSG00000042367	ENSMUSG00000042510
ENSMUSG00000042684	ENSMUSG00000042759	ENSMUSG00000042903	ENSMUSG00000043085	ENSMUSG00000043110	ENSMUSG00000043924	ENSMUSG00000044317
ENSMUSG00000044393	ENSMUSG00000044468	ENSMUSG00000044595	ENSMUSG00000044626	ENSMUSG00000044628	ENSMUSG00000044788	ENSMUSG00000045314
ENSMUSG00000045319	ENSMUSG00000045573	ENSMUSG00000045672	ENSMUSG00000046133	ENSMUSG00000046179	ENSMUSG00000046410	ENSMUSG00000046727
ENSMUSG00000047409	ENSMUSG00000048087	ENSMUSG00000048126	ENSMUSG00000048373	ENSMUSG00000048538	ENSMUSG00000048915	ENSMUSG00000049382
ENSMUSG00000050106	ENSMUSG00000050761	ENSMUSG00000050777	ENSMUSG00000050931	ENSMUSG00000051159	ENSMUSG00000052180	ENSMUSG00000052852
ENSMUSG00000052854	ENSMUSG00000053559	ENSMUSG00000054150	ENSMUSG00000054385	ENSMUSG00000054727	ENSMUSG00000054753	ENSMUSG00000054889
ENSMUSG00000054893	ENSMUSG00000055936	ENSMUSG00000056004	ENSMUSG00000056220	ENSMUSG00000056411	ENSMUSG00000056413	ENSMUSG00000056436
ENSMUSG00000056888	ENSMUSG00000057000	ENSMUSG00000057378	ENSMUSG00000057948	ENSMUSG00000058806	ENSMUSG00000059022	ENSMUSG00000059430
ENSMUSG00000061232	ENSMUSG00000061601	ENSMUSG00000062157	ENSMUSG00000063018	ENSMUSG00000063354	ENSMUSG00000063632	ENSMUSG00000063804
ENSMUSG00000064194	ENSMUSG00000064337	ENSMUSG00000066438	ENSMUSG00000066861	ENSMUSG00000067276	ENSMUSG00000067338	ENSMUSG00000067389
ENSMUSG00000067561	ENSMUSG00000067562	ENSMUSG00000067702	ENSMUSG00000067818	ENSMUSG00000067873	ENSMUSG00000068735	ENSMUSG00000068762
ENSMUSG00000068876	ENSMUSG00000069053	ENSMUSG00000069601	ENSMUSG00000069620	ENSMUSG00000070644	ENSMUSG00000070780	ENSMUSG00000071964
ENSMUSG00000072214	ENSMUSG00000073408	ENSMUSG00000073411	ENSMUSG00000073421	ENSMUSG00000074207	ENSMUSG00000074259	ENSMUSG00000074272
ENSMUSG00000074489	ENSMUSG00000075707	ENSMUSG00000078670	ENSMUSG00000078937	ENSMUSG00000078954	ENSMUSG00000079259	ENSMUSG00000081044
ENSMUSG00000081965	ENSMUSG00000083657	ENSMUSG00000085006	ENSMUSG00000085009	ENSMUSG00000085106	ENSMUSG00000085309	ENSMUSG00000085595
ENSMUSG00000085974	ENSMUSG00000086780	ENSMUSG00000086844	ENSMUSG00000087135	ENSMUSG00000090062	ENSMUSG00000091106	ENSMUSG00000091479
ENSMUSG00000091490	ENSMUSG00000091594	ENSMUSG00000092193	ENSMUSG00000092327	ENSMUSG00000092335	ENSMUSG00000092627	ENSMUSG00000000223
ENSMUSG00000000385	ENSMUSG00000000392	ENSMUSG00000000440	ENSMUSG00000000690	ENSMUSG00000000805	ENSMUSG00000000942	ENSMUSG00000001166
ENSMUSG00000001510	ENSMUSG00000001741	ENSMUSG00000001946	ENSMUSG00000002100	ENSMUSG00000002944	ENSMUSG00000003341	ENSMUSG00000003484
ENSMUSG00000003505	ENSMUSG00000003555	ENSMUSG00000004366	ENSMUSG00000004540	ENSMUSG00000004542	ENSMUSG00000004655	ENSMUSG00000004791
ENSMUSG00000005057	ENSMUSG00000005268	ENSMUSG00000005952	ENSMUSG00000006200	ENSMUSG00000006362	ENSMUSG00000006488	ENSMUSG00000006490
ENSMUSG00000006777	ENSMUSG00000007030	ENSMUSG00000007279	ENSMUSG00000007805	ENSMUSG00000007908	ENSMUSG00000008601	ENSMUSG00000008789
ENSMUSG00000009378	ENSMUSG00000009646	ENSMUSG00000010086	ENSMUSG00000010529	ENSMUSG00000010601	ENSMUSG00000011463	ENSMUSG00000013611
ENSMUSG00000015627	ENSMUSG00000015966	ENSMUSG00000015970	ENSMUSG00000016942	ENSMUSG00000017868	ENSMUSG00000017950	ENSMUSG00000019278
ENSMUSG00000019756	ENSMUSG00000019900	ENSMUSG00000019936	ENSMUSG00000020077	ENSMUSG00000020080	ENSMUSG00000020101	ENSMUSG00000020154
ENSMUSG00000020159	ENSMUSG00000020411	ENSMUSG00000020429	ENSMUSG00000020486	ENSMUSG00000020609	ENSMUSG00000020620	ENSMUSG00000020641
ENSMUSG00000020682	ENSMUSG00000020701	ENSMUSG00000020723	ENSMUSG00000020805	ENSMUSG00000020810	ENSMUSG00000020826	ENSMUSG00000020838
ENSMUSG00000020901	ENSMUSG00000021087	ENSMUSG00000021123	ENSMUSG00000021208	ENSMUSG00000021211	ENSMUSG00000021213	ENSMUSG00000021280
ENSMUSG00000021345	ENSMUSG00000021346	ENSMUSG00000021347	ENSMUSG00000021348	ENSMUSG00000021363	ENSMUSG00000021384	ENSMUSG00000021404
ENSMUSG00000021439	ENSMUSG00000021440	ENSMUSG00000021509	ENSMUSG00000021573	ENSMUSG00000021587	ENSMUSG00000021604	ENSMUSG00000021708
ENSMUSG00000021904	ENSMUSG00000021974	ENSMUSG00000022144	ENSMUSG00000022225	ENSMUSG00000022408	ENSMUSG00000022824	ENSMUSG00000022831
ENSMUSG00000022875	ENSMUSG00000022886	ENSMUSG00000022949	ENSMUSG00000022996	ENSMUSG00000023046	ENSMUSG00000023120	ENSMUSG00000023159
ENSMUSG00000023185	ENSMUSG00000023959	ENSMUSG00000024029	ENSMUSG00000024053	ENSMUSG00000024064	ENSMUSG00000024164	ENSMUSG00000024172
ENSMUSG00000024386	ENSMUSG00000024440	ENSMUSG00000024485	ENSMUSG00000024500	ENSMUSG00000024503	ENSMUSG00000024552	ENSMUSG00000024663
ENSMUSG00000024727	ENSMUSG00000024990	ENSMUSG00000025020	ENSMUSG00000025075	ENSMUSG00000025105	ENSMUSG00000025165	ENSMUSG00000025279
ENSMUSG00000025375	ENSMUSG00000025497	ENSMUSG00000025582	ENSMUSG00000025876	ENSMUSG00000026073	ENSMUSG00000026090	ENSMUSG00000026180
ENSMUSG00000026227	ENSMUSG00000026241	ENSMUSG00000026295	ENSMUSG00000026304	ENSMUSG00000026347	ENSMUSG00000026417	ENSMUSG00000026527
ENSMUSG00000026582	ENSMUSG00000026630	ENSMUSG00000026676	ENSMUSG00000026726	ENSMUSG00000026765	ENSMUSG00000026971	ENSMUSG00000027004
ENSMUSG00000027015	ENSMUSG00000027016	ENSMUSG00000027068	ENSMUSG00000027186	ENSMUSG00000027215	ENSMUSG00000027219	ENSMUSG00000027224
ENSMUSG00000027225	ENSMUSG00000027444	ENSMUSG00000027457	ENSMUSG00000027524	ENSMUSG00000027643	ENSMUSG00000027765	ENSMUSG00000027827
ENSMUSG00000027875	ENSMUSG00000027895	ENSMUSG00000027954	ENSMUSG00000028020	ENSMUSG00000028033	ENSMUSG00000028036	ENSMUSG00000028125
ENSMUSG00000028176	ENSMUSG00000028337	ENSMUSG00000028351	ENSMUSG00000028356	ENSMUSG00000028539	ENSMUSG00000028631	ENSMUSG00000028655
ENSMUSG00000028778	ENSMUSG00000028871	ENSMUSG00000028965	ENSMUSG00000029096	ENSMUSG00000029123	ENSMUSG00000029195	ENSMUSG00000029260
ENSMUSG00000029272	ENSMUSG00000029369	ENSMUSG00000029370	ENSMUSG00000029608	ENSMUSG00000029759	ENSMUSG00000029875	ENSMUSG00000029919
ENSMUSG00000030049	ENSMUSG00000030050	ENSMUSG00000030092	ENSMUSG00000030109	ENSMUSG00000030110	ENSMUSG00000030217	ENSMUSG00000030237
ENSMUSG00000030366	ENSMUSG00000030368	ENSMUSG00000030373	ENSMUSG00000030468	ENSMUSG00000030747	ENSMUSG00000031125	ENSMUSG00000031133
ENSMUSG00000031137	ENSMUSG00000031179	ENSMUSG00000031202	ENSMUSG00000031273	ENSMUSG00000031283	ENSMUSG00000031284	ENSMUSG00000031285
ENSMUSG00000031323	ENSMUSG00000031410	ENSMUSG00000031517	ENSMUSG00000031621	ENSMUSG00000031636	ENSMUSG00000031659	ENSMUSG00000031698
ENSMUSG00000031780	ENSMUSG00000031825	ENSMUSG00000031844	ENSMUSG00000031870	ENSMUSG00000031891	ENSMUSG00000031963	ENSMUSG00000032080
ENSMUSG00000032083	ENSMUSG00000032087	ENSMUSG00000032226	ENSMUSG00000032356	ENSMUSG00000032380	ENSMUSG00000032564	ENSMUSG00000032679
ENSMUSG00000032744	ENSMUSG00000032908	ENSMUSG00000032940	ENSMUSG00000033007	ENSMUSG00000033063	ENSMUSG00000033187	ENSMUSG00000033192
ENSMUSG00000033538	ENSMUSG00000033737	ENSMUSG00000033831	ENSMUSG00000033834	ENSMUSG00000034308	ENSMUSG00000034648	ENSMUSG00000034780
ENSMUSG00000034842	ENSMUSG00000034855	ENSMUSG00000034898	ENSMUSG00000034997	ENSMUSG00000035085	ENSMUSG00000035273	ENSMUSG00000035349
ENSMUSG00000035373	ENSMUSG00000035395	ENSMUSG00000035429	ENSMUSG00000035513	ENSMUSG00000035852	ENSMUSG00000036062	ENSMUSG00000036109
ENSMUSG00000036412	ENSMUSG00000036570	ENSMUSG00000036832	ENSMUSG00000036964	ENSMUSG00000037014	ENSMUSG00000037060	ENSMUSG00000037124
ENSMUSG00000037335	ENSMUSG00000037370	ENSMUSG00000037406	ENSMUSG00000037624	ENSMUSG00000037754	ENSMUSG00000037962	ENSMUSG00000037994
ENSMUSG00000038115	ENSMUSG00000038224	ENSMUSG00000038253	ENSMUSG00000038327	ENSMUSG00000038370	ENSMUSG00000038415	ENSMUSG00000038530
ENSMUSG00000038580	ENSMUSG00000038624	ENSMUSG00000038721	ENSMUSG00000038725	ENSMUSG00000038751	ENSMUSG00000038891	ENSMUSG00000039236
ENSMUSG00000039385	ENSMUSG00000039865	ENSMUSG00000039878	ENSMUSG00000040065	ENSMUSG00000040164	ENSMUSG00000040380	ENSMUSG00000040413
ENSMUSG00000040543	ENSMUSG00000040569	ENSMUSG00000040605	ENSMUSG00000040808	ENSMUSG00000040856	ENSMUSG00000040891	ENSMUSG00000041078
ENSMUSG00000041439	ENSMUSG00000041608	ENSMUSG00000041616	ENSMUSG00000041731	ENSMUSG00000041737	ENSMUSG00000041842	ENSMUSG00000042115
ENSMUSG00000042182	ENSMUSG00000042501	ENSMUSG00000042784	ENSMUSG00000042985	ENSMUSG00000043017	ENSMUSG00000043029	ENSMUSG00000043219
ENSMUSG00000043498	ENSMUSG00000043501	ENSMUSG00000043549	ENSMUSG00000043760	ENSMUSG00000043953	ENSMUSG00000044534	ENSMUSG00000045094
ENSMUSG00000045382	ENSMUSG00000045777	ENSMUSG00000045915	ENSMUSG00000045991	ENSMUSG00000046169	ENSMUSG00000046318	ENSMUSG00000046413
ENSMUSG00000046607	ENSMUSG00000046807	ENSMUSG00000046856	ENSMUSG00000046899	ENSMUSG00000046961	ENSMUSG00000046971	ENSMUSG00000047182
ENSMUSG00000047330	ENSMUSG00000047661	ENSMUSG00000047728	ENSMUSG00000047842	ENSMUSG00000048120	ENSMUSG00000048387	ENSMUSG00000048489
ENSMUSG00000048572	ENSMUSG00000049107	ENSMUSG00000049191	ENSMUSG00000049265	ENSMUSG00000049404	ENSMUSG00000049436	ENSMUSG00000049511
ENSMUSG00000049555	ENSMUSG00000049709	ENSMUSG00000049719	ENSMUSG00000049892	ENSMUSG00000049928	ENSMUSG00000050022	ENSMUSG00000050063
ENSMUSG00000050064	ENSMUSG00000050234	ENSMUSG00000050295	ENSMUSG00000050345	ENSMUSG00000050395	ENSMUSG00000050423	ENSMUSG00000050854
ENSMUSG00000051076	ENSMUSG00000051279	ENSMUSG00000052005	ENSMUSG00000052085	ENSMUSG00000052560	ENSMUSG00000052914	ENSMUSG00000053024
ENSMUSG00000053063	ENSMUSG00000053093	ENSMUSG00000053199	ENSMUSG00000053228	ENSMUSG00000053897	ENSMUSG00000054146	ENSMUSG00000054161
ENSMUSG00000054252	ENSMUSG00000054258	ENSMUSG00000054640	ENSMUSG00000054932	ENSMUSG00000055298	ENSMUSG00000055360	ENSMUSG00000055368
ENSMUSG00000055413	ENSMUSG00000055639	ENSMUSG00000055679	ENSMUSG00000055976	ENSMUSG00000056222	ENSMUSG00000056296	ENSMUSG00000056380
ENSMUSG00000056457	ENSMUSG00000056492	ENSMUSG00000056643	ENSMUSG00000056648	ENSMUSG00000057195	ENSMUSG00000057726	ENSMUSG00000058153
ENSMUSG00000058248	ENSMUSG00000058360	ENSMUSG00000058620	ENSMUSG00000058624	ENSMUSG00000059334	ENSMUSG00000059668	ENSMUSG00000059741
ENSMUSG00000060470	ENSMUSG00000060550	ENSMUSG00000060981	ENSMUSG00000061143	ENSMUSG00000061451	ENSMUSG00000061808	ENSMUSG00000062342
ENSMUSG00000062551	ENSMUSG00000062591	ENSMUSG00000062705	ENSMUSG00000062960	ENSMUSG00000063303	ENSMUSG00000064016	ENSMUSG00000064039
ENSMUSG00000064246	ENSMUSG00000064293	ENSMUSG00000066687	ENSMUSG00000066760	ENSMUSG00000067235	ENSMUSG00000067771	ENSMUSG00000068048
ENSMUSG00000068227	ENSMUSG00000068452	ENSMUSG00000068587	ENSMUSG00000069258	ENSMUSG00000069259	ENSMUSG00000070719	ENSMUSG00000070796
ENSMUSG00000070797	ENSMUSG00000070798	ENSMUSG00000070867	ENSMUSG00000071001	ENSMUSG00000071042	ENSMUSG00000071317	ENSMUSG00000071452
ENSMUSG00000071506	ENSMUSG00000071745	ENSMUSG00000073012	ENSMUSG00000073027	ENSMUSG00000073130	ENSMUSG00000073514	ENSMUSG00000073530
ENSMUSG00000073731	ENSMUSG00000073795	ENSMUSG00000074359	ENSMUSG00000074361	ENSMUSG00000074373	ENSMUSG00000074418	ENSMUSG00000074420
ENSMUSG00000074505	ENSMUSG00000074788	ENSMUSG00000074870	ENSMUSG00000074874	ENSMUSG00000074923	ENSMUSG00000075224	ENSMUSG00000075225
ENSMUSG00000075296	ENSMUSG00000075463	ENSMUSG00000075604	ENSMUSG00000076928	ENSMUSG00000078117	ENSMUSG00000078793	ENSMUSG00000078851
ENSMUSG00000078921	ENSMUSG00000078922	ENSMUSG00000079017	ENSMUSG00000079021	ENSMUSG00000079049	ENSMUSG00000079071	ENSMUSG00000079092
ENSMUSG00000079103	ENSMUSG00000079227	ENSMUSG00000079479	ENSMUSG00000079492	ENSMUSG00000079499	ENSMUSG00000079507	ENSMUSG00000079531
ENSMUSG00000079534	ENSMUSG00000081237	ENSMUSG00000081778	ENSMUSG00000082618	ENSMUSG00000082629	ENSMUSG00000082674	ENSMUSG00000083814
ENSMUSG00000084308	ENSMUSG00000084803	ENSMUSG00000084843	ENSMUSG00000085114	ENSMUSG00000085139	ENSMUSG00000085832	ENSMUSG00000085957
ENSMUSG00000085990	ENSMUSG00000086141	ENSMUSG00000086255	ENSMUSG00000086358	ENSMUSG00000086391	ENSMUSG00000086549	ENSMUSG00000086742
ENSMUSG00000086806	ENSMUSG00000086878	ENSMUSG00000086982	ENSMUSG00000087143	ENSMUSG00000087583	ENSMUSG00000087623	ENSMUSG00000089635
ENSMUSG00000090316	ENSMUSG00000090425	ENSMUSG00000090442	ENSMUSG00000090847	ENSMUSG00000090863	ENSMUSG00000090962	ENSMUSG00000091412
ENSMUSG00000091439	ENSMUSG00000091626	ENSMUSG00000091663	ENSMUSG00000091705	ENSMUSG00000091746	ENSMUSG00000092215
WNT9A	EGFL6	ACVRL1	GM2A	DNMT3L	ITGB7	ACP5	CNN1	TSPAN33	VWF	CLGN	PRKD1	BICD1	PRODH	MAPK13	CRABP2	NDRG1	KIT	APOA2	UPK1A
SUSD2	SLC5A6	SLC44A4	ATP1A2	CAV1	CABP7	ASCL2	TEX11	SLC38A3	DAZL	B4GALNT2	MERTK	GALNS	ALDH1A3	ARNT2	LONRF3	RAB11FIP4	ADA	JPH2	CLDN7
MYH11	SLFN3	ARID3A	CCDC170	PLAGL1	LAMA4	EGFR	HCN2	GFPT2	ACE	ADAP2	ASPA	CORO6	HOXB9	FOXG1	NOVA1	PYGL	KIF26A	ELOVL2	SEMA4D
GLRX	SRD5A1	IQGAP2	PARP8	PLAU	ERO1L	GATA4	LCP1	RGCC	CLU	NEFL	HR	DOK2	NPR3	TGM1	KHDRBS3	PARVB	EMP2	FETUB	KRT18
PRPH	CCNDBP1	SMOC2	CLDN6	SLC29A1	PIM1	ABCG1	APOM	CAMK2A	CSF1R	PGA5	FAS	PCGF5	CTSW	SLC1A1	ABHD6	EPS8L2	CPEB1	NRP1	HOMER2
MYO5B	MGAT4A	DES	EFHD1	TNNI1	SLC45A3	FAM129A	DUSP27	ATP1B1	PLXNA2	MGST3	RALGDS	PHF19	PSD4	TFPI	ITGA6	LTK	PROCR	GNB4	SOHLH2
DNAJB4	SEMA4A	ECM1	CTH	FAM219A	TPM2	PRAMEF12	COL9A2	GALE	CCDC28B	SLC30A2	EXTL1	FAM126A	ARHGEF16	BST1	PPP2R2C	UCHL1	PLAC8	TESC	NAAA
RASAL1	DTX1	MEDAG	ANXA4	FOXP1	BHLHE41	RHPN2	RAB38	SH3GL3	CALCA	DKKL1	WAS	MSN	STARD8	CAR5B	DUSP9	TRIML1	ADGRG1	B3GNT3	HAS3
VSTM5	TBX20	ADAMTS8	CLMP	TAGLN	CRABP1	PSTPIP1	CTSH	PTGS2	TDGF1	LAMA1	AFAP1L1	LMO7	GAS7	MGLL	AA467197	PANK1	WBSCR17	MFSD7C	SLC26A2
PKD1L2	GBX2	PPM1H	SEMA3F	TLE6	TMEM106A	DPP4	ADRB1	NFKBIZ	CDCP1	REEP6	KRT17	HMHA1	ACTA2	3632451O06RIK	LUM	CLCA3B	MYOM3	OVOL2	GALNT6
LDLRAP1	VNN1	ASPG	WNK2	PRDM1	HRC	SEMA7A	GDF15	SUSD4	ATP6V0A4	VILL	GCNT1	BAIAP2L1	ADGRG6	RPL39L	ZFP750	LGI2	ATP6V0E2	MOCOS	DOCK3
GPR176	THBS1	ARHGAP9	GYLTL1B	IGSF23	APOC1	CYP2S1	PDE9A	SOX15	AK7	PRELP	IGSF3	KANK3	RASSF4	LYN	GJB5	GJB3	AA986860	NPL	APOBR
FOXO4	TMEM82	LRRN4	NCMAP	GPR4	DSG2	FAM46C	DND1	LIPH	RNF208	FADS6	SOWAHB	PROSER2	PENK	COL27A1	C130073F10RIK	E2F8	KCNK6	CYSTM1	CTDSPL
GM4737	COL6A3	FGFBP1	GM9826	EFNA5	KRT8	TMC8	GP1BB	TMEM37	SGMS2	CITED1	SERPINB6C	REEP1	NRK	SMAGP	SYNE3	CEACAM2	1700013H16RIK	AU018091	DSP
ZFP667	NA	9330182L06RIK	PLA2G4A	GM12500	ADAP1	CYCT	GLIPR1	NXF3	RYR3	UNC13D	COL13A1	KCP	ACTG2	H2-K1	PCLO	IFNLR1	2010204K13RIK	SLC39A4	SOX11
LIN28B	ZFP936	MT-RNR1	PLEKHD1	OAS1G	CAPN6	TUBA3B	GM17080	DMRTC1C2	DMRTC1C1	TUBA3A	MYL9	HTATSF1	TRP53I11	GSTM6	CGN	UBA1Y	ANK3	GM5250	ETNK2
RBM47	NA	42618	DPCR1	H2-D1	H2-AB1	ADH1	GRAMD2	CEACAM1	BGLAP3	DIO3	FAM174B	CPT1B	ARHGAP8	TRIM71	AU015836	GM11620	GM12245	BC021767	GM12977
GM16000	NA	GM16090	NA	NA	B230206H07RIK	GM16096	GALNT6OS	NA	GM17035	TRIML2	GM17067	CD9-PS	NA	GM7221	D130058E05RIK	DRP2	TMPRSS2	FAP	PPARG
HOXB6	CAR4	HOXA4	OAS1C	DLX3	IL16	ESAM	MYBPC3	CD36	ATP8B3	CYP4F18	PSG18	CYP17A1	SST	PSG17	PSG19	AQP1	PGF	SH2B2	PRLR
TRPV1	RHOX6	CBFA2T3	PRL7A1	PRL8A9	KRT23	VWA7	SCUBE2	TWIST2	HMGCLL1	RAB25	CEACAM5	SLC16A12	PLA2G12B	RNF112	GM266	APOL7A	CPB1	SNX31	GATA5
IL17RB	CHDH	TMPRSS6	SGK2	HNF4A	DPEP1	PRL8A1	RFX6	EPYC	SRGN	HKDC1	4632428N05RIK	PTPRB	GABRP	NIPAL4	IGFBP1	42617	APOB	ABCA8B	RSAD2
MMP28	TMEM132E	CACNG4	SLC13A5	CYGB	NOS2	SLC6A4	PIK3R5	RTN1	RDH12	IFI27L2B	AKR1C12	AKR1C13	EXOC3L4	PRL8A6	PRL8A8	PRL7B1	PRL7D1	MAK	SUSD3
SERPINB9C	CTSQ	CTS7	SLC25A48	TPPP	PCSK1	IRX4	RASGRF2	SEMA3G	FGF9	GDNF	CMA1	FAM83F	MUC13	HCLS1	KNG1	PRL2A1	CLIC6	WNT10B	IGFBP6
GM853	PSG29	CEACAM14	CLIC5	TFF3	EMILIN2	GALNT14	C3	ST6GAL2	PROC	PCDH12	SLC4A9	PPP2R2B	SPINK1	SLC14A2	RAB3IL1	TRPM6	RBP4	SLIT1	HABP2
BNC1	SECTM1A	DNASE1L3	AATK	CDHR5	NPTX1	UNC5A	IL1R2	2010300C02RIK	CXCR2	2810459M11RIK	NPPC	SPP2	RAB17	TMEM163	PIGR	RGS7	SELE	BATF3	CCDC3
CUBN	LYPD6B	ITGB6	FRZB	CYBRD1	ZFP385B	DHRS9	ELF5	CD82	SLC28A2	DUOXA1	DUOXA2	8030411F24RIK	SNPH	EDN3	GHRH	P2RY1	KCNAB1	HMGCS2	KCNC4
EFNA1	GLRB	KCNQ5	PTGFR	ABCA4	LRRC7	CORO2A	BRINP1	AMBP	ARTN	KCNQ4	MFSD2A	HCRTR1	RSPO1	TNFRSF9	HTRA3	STK32B	KLB	UGT2B34	SULT1E1
AFM	RASSF6	RPH3A	PON3	CCDC184	HPGDS	GKN2	GKN1	CNTN6	SLC6A12	RET	ART4	SLCO1A4	CEACAM12	CEACAM11	PSG28	SIGLECG	DGAT2	3830403N18RIK	ARHGEF6
FGF13	3830417A13RIK	RAB39B	COL4A6	CHRDL1	PAK3	DCX	DMRTC1A	NXF7	GPM6A	ISX	PDLIM3	ADCY7	MYLK3	CCL17	CRISPLD2	HSD17B2	PGR	HSD11B2	BMPER
APOA4	APOA1	DSCAML1	GCNT3	RASGRF1	DAPK2	CPNE4	CD59A	HEYL	SGPP2	RBM11	ASIC4	CNTNAP3	BC016579	LPCAT2	CASP4	FNDC3C1	FGB	TPBPA	SDR42E1
LRRN1	B3GALT1	ART3	CXCL10	FILIP1	HTR2A	1700020L24RIK	HPSE	MIA2	CCL7	PET2	PTPRH	NTNG2	MISP	PHF24	MBNL3	ARSI	FXYD1	LPAR3	TRIM17
SSTR4	PRKCDBP	TRIM58	HAND1	ENPP1	HTRA4	KCNK2	PPP1R16B	FAM101A	SLC9B2	ANO2	SERPINF2	HOXA5	SERPINB9F	PCP4L1	FOXQ1	RGS4	SCT	NEPN	HOXB7
PKHD1L1	PTK6	PRL3B1	ISG20	CDH6	SLC44A3	SLC39A5	PFPL	KCNS1	CBLN3	TIMD2	PITPNM3	SLC26A7	BACE2	S100G	DLK1	FOXA3	GRID1	MFSD6	ENTPD3
NPPA	PGM5	TMEM45B	FHDC1	KLHDC8A	BEND6	CPA6	MUC1	UPK3B	PTGIR	TRPV3	HOXA6	9330132A10RIK	LGALS2	FAM90A1B	PKHD1	CCRL2	ACKR2	ARHGEF37	CXCR4
IFITM10	CCDC42	ONECUT2	ADAMTS6	CCBE1	IRX3OS	HRK	LRRC75B	GPR1	PRL7A2	GPR156	PLA2G4F	IRS3	KCNE4	1600012P17RIK	BC025446	DIRAS2	ENTPD1	OSR1	8430408G22RIK
TMEM252	NTF3	RGAG4	KCNK3	RARRES1	UPK1B	HTR1B	TMIE	NLRP10	PRSS46	RASD1	GLP2R	AMZ1	KLK6	ZFP697	GJA4	FOXC1	4930486L24RIK	TNFSF15	PPP1R3G
TMEM125	VTCN1	GDF6	GM9864	DOCK8	CPNE8	CYP2J6	CNTN2	CLEC12A	MYH7	ARHGAP20	CEACAM3	SLC39A8	KRT15	FAM83E	FGFR3	GM5082	SLC8A1	AFP	CTSJ
PRL2C5	SLC6A2	H2-Q5	DACH1	CTSR	CLDN23	SPOCK1	SYNPR	GPR50	PRL2C3	ADGRF5	CHST13	HOXB8	CEACAM13	SERPINB9G	SEZ6L	KCNH1	GM10040	ADRA2B	GDA
ZFP36L3	KRT4	MYL3	ADGRG3	H2-Q7	HIST1H4H	MAML3	TMEM151A	TTR	SERPINB9E	PRL2C1	TUBB4A	TPBPB	KDR	NA	GM648	CCR1L1	CHIL1	CNTN4	ZBTB16
PSG16	H2-Q10	GM14685	RHOX9	IL2RB	DUOX2	MGAM	PRL2B1	PRL6A1	PLA2G4D	PSG21	PSG27	PSG25	TRABD2B	HRCT1	RASGRP3	BVES	GM11397	TMEM139	DXBAY18
FND3C2	DMRTC1B	GM1141	DOK6	PAPPA2	AI507597	6430531B16RIK	PSG23	C5AR2	GM10680	GM15930	GM10693	FAT3	NA	CTS3	CTLA2B	PAK6	LRRC55	CCDC162	ALDH3B2
4930594M22RIK	CYP11B1	TRAC	GM16485	GM5155	HIST3H2A	TGTP2	TGTP1	IFI27L2A	NA	SERPINB1C	GM14085	PRL2C2	TGM7	CCR5	GM9112	GM11127	6530402F18RIK	H2-Q1	GM5936
GM5640	GM11385	GM6325	GM14852	GM5639	GM11914	GM5133	GM14593	5830444B04RIK	B230312C02RIK	1600025M17RIK	A730046J19RIK	NA	SYNA	GM16731	9030622O22RIK	GM11534	GM13270	1700042O10RIK	GM13648
GM16201	GM13054	NA	NA	A830082K12RIK	NA	GM12404	GM16559	NA	NA	NA	NA	A530084C06RIK	NA	GM2895	NA	NA	NA	H2-Q2	NA
NA
Unique Undiff	N=184
ENSMUSG00000000037	ENSMUSG00000000184	ENSMUSG00000001020	ENSMUSG00000001025	ENSMUSG00000001661	ENSMUSG00000002033	ENSMUSG00000003410
ENSMUSG00000004044	ENSMUSG00000006205	ENSMUSG00000006587	ENSMUSG00000008398	ENSMUSG00000014599	ENSMUSG00000017009	ENSMUSG00000017466
ENSMUSG00000019102	ENSMUSG00000019235	ENSMUSG00000019929	ENSMUSG00000020053	ENSMUSG00000020226	ENSMUSG00000020387	ENSMUSG00000020423
ENSMUSG00000020437	ENSMUSG00000020661	ENSMUSG00000020846	ENSMUSG00000021186	ENSMUSG00000021250	ENSMUSG00000021253	ENSMUSG00000021388
ENSMUSG00000021765	ENSMUSG00000021835	ENSMUSG00000021879	ENSMUSG00000022150	ENSMUSG00000022231	ENSMUSG00000022432	ENSMUSG00000022469
ENSMUSG00000022602	ENSMUSG00000022665	ENSMUSG00000022687	ENSMUSG00000022816	ENSMUSG00000022912	ENSMUSG00000022952	ENSMUSG00000023913
ENSMUSG00000023945	ENSMUSG00000024313	ENSMUSG00000024526	ENSMUSG00000024940	ENSMUSG00000025085	ENSMUSG00000025977	ENSMUSG00000026365
ENSMUSG00000026479	ENSMUSG00000026586	ENSMUSG00000026672	ENSMUSG00000026768	ENSMUSG00000027208	ENSMUSG00000027317	ENSMUSG00000027750
ENSMUSG00000027947	ENSMUSG00000027955	ENSMUSG00000028031	ENSMUSG00000028369	ENSMUSG00000028581	ENSMUSG00000028780	ENSMUSG00000028926
ENSMUSG00000029761	ENSMUSG00000029810	ENSMUSG00000029838	ENSMUSG00000029848	ENSMUSG00000030087	ENSMUSG00000030222	ENSMUSG00000030409
ENSMUSG00000030560	ENSMUSG00000030770	ENSMUSG00000031451	ENSMUSG00000031662	ENSMUSG00000031673	ENSMUSG00000032060	ENSMUSG00000032092
ENSMUSG00000032094	ENSMUSG00000032204	ENSMUSG00000032470	ENSMUSG00000032591	ENSMUSG00000032649	ENSMUSG00000032714	ENSMUSG00000033149
ENSMUSG00000033191	ENSMUSG00000034324	ENSMUSG00000034336	ENSMUSG00000034690	ENSMUSG00000034739	ENSMUSG00000035258	ENSMUSG00000035299
ENSMUSG00000035357	ENSMUSG00000036098	ENSMUSG00000036256	ENSMUSG00000037028	ENSMUSG00000037188	ENSMUSG00000037679	ENSMUSG00000037852
ENSMUSG00000038020	ENSMUSG00000038296	ENSMUSG00000038418	ENSMUSG00000038463	ENSMUSG00000038578	ENSMUSG00000039337	ENSMUSG00000039462
ENSMUSG00000039601	ENSMUSG00000041782	ENSMUSG00000042010	ENSMUSG00000042834	ENSMUSG00000043073	ENSMUSG00000044674	ENSMUSG00000045658
ENSMUSG00000046435	ENSMUSG00000047242	ENSMUSG00000048332	ENSMUSG00000048458	ENSMUSG00000049001	ENSMUSG00000051048	ENSMUSG00000051457
ENSMUSG00000054272	ENSMUSG00000054675	ENSMUSG00000055675	ENSMUSG00000055945	ENSMUSG00000057098	ENSMUSG00000057321	ENSMUSG00000058914
ENSMUSG00000058976	ENSMUSG00000062007	ENSMUSG00000062380	ENSMUSG00000063011	ENSMUSG00000063296	ENSMUSG00000063727	ENSMUSG00000064215
ENSMUSG00000066129	ENSMUSG00000067399	ENSMUSG00000070034	ENSMUSG00000070327	ENSMUSG00000070424	ENSMUSG00000070495	ENSMUSG00000070616
ENSMUSG00000070618	ENSMUSG00000070619	ENSMUSG00000070803	ENSMUSG00000070826	ENSMUSG00000070828	ENSMUSG00000070890	ENSMUSG00000070902
ENSMUSG00000072109	ENSMUSG00000072566	ENSMUSG00000072817	ENSMUSG00000072823	ENSMUSG00000073497	ENSMUSG00000073499	ENSMUSG00000073726
ENSMUSG00000074009	ENSMUSG00000074743	ENSMUSG00000075394	ENSMUSG00000076749	ENSMUSG00000078190	ENSMUSG00000078302	ENSMUSG00000078510
ENSMUSG00000078511	ENSMUSG00000078514	ENSMUSG00000078537	ENSMUSG00000079037	ENSMUSG00000079162	ENSMUSG00000079422	ENSMUSG00000079455
ENSMUSG00000079592	ENSMUSG00000079672	ENSMUSG00000079674	ENSMUSG00000080241	ENSMUSG00000084919	ENSMUSG00000087366	ENSMUSG00000087400
ENSMUSG00000090714	ENSMUSG00000090854	ENSMUSG00000091335	ENSMUSG00000091643	ENSMUSG00000091647	ENSMUSG00000091779	ENSMUSG00000091880
ENSMUSG00000092130	ENSMUSG00000092258
SCML2	CCND2	S100A4	S100A6	HOXC6	CD3G	ELAVL3	PTRF	HTRA1	SNAI3	ELK3	CSF1	SDC4	TIMP2	ALDH3A1	RPS6KL1	DCN	IGF1	SLC5A4B	JADE2
BTG2	MYO1G	DNMT3A	FAM101B	FBLN5	FOS	TGFB3	ASPN	FST	BMP4	DNAH12	DAB2	SEMA5A	SMC1B	RAPGEF3	ARC	CCDC80	BOC	FSTL1	PROS1
RUNX1	PLA2G7	SLC5A7	MEP1B	CIDEA	LTBP3	ABLIM1	BOLL	CFH	LAMC2	PRRX1	OPTN	ITGA8	FGF7	PPP1R14D	POSTN	IL6RA	FAM198B	DKK2	SVEP1
LAPTM5	SEMA3C	CDK14	CALD1	TMEM176B	PTN	STRA8	KLF15	RERG	DMPK	CTSC	PARVA	GAS6	SNX20	CDH11	CRYAB	MPZL2	CD3D	AQP9	MRAS
MST1	COLGALT2	SYDE1	PHLDB2	TIE1	TMEM132C	INA	NLRP4C	MFRP	ABI3BP	MID1	PDZRN3	MYRF	IGFBP7	GM12800	GRHL3	INF2	CPE	RAPGEFL1	GALNT18
EGR1	OLFML2B	SUSD1	TEX19.2	COL10A1	RCAN2	LAD1	ACACB	NREP	USP17LE	FZD1	PID1	GM13078	TAF9B	LHFP	FAM212B	NDNF	P4HA3	SPN	ZSCAN4C
TMEM119	KBTBD11	PRR18	EBF1	USP17LD	C1QTNF3	USP17LC	HSH2D	TUBB3	MSLN	TMEM117	TNFRSF11B	IFI27	KNDC1	TRIM43C	SP110	RNF213	ART5	CTCFL	GM13040
BC080695	GM13119	CITED4	NA	ZSCAN4F	GM12794	ZFP352	A530040E14RIK	NA	NA	NA	AA792892	NA	NA	NA	THBD	HOXC4	TCRG-C1	DNM3OS	FOXD1
GM13101	PRAMEF25	NA	B020031M17RIK	PRNP	TRIM43B	NA	GM16026	C1QTNF5	NA	NA	DPPA3-PS	PTPRTOS	JUNOS	GM15270	ZSCAN4D	GM4340	NA	NA	NA
GM21293	NA	D030025P21RIK	GM20444
Oct1xOct4:	N=325
ENSMUSG00000040280	ENSMUSG00000047787	ENSMUSG00000079470	ENSMUSG00000005198	ENSMUSG00000029475	ENSMUSG00000036106	ENSMUSG00000005973
ENSMUSG00000036114	ENSMUSG00000024955	ENSMUSG00000037552	ENSMUSG00000022245	ENSMUSG00000060244	ENSMUSG00000020993	ENSMUSG00000033955
ENSMUSG00000028678	ENSMUSG00000058761	ENSMUSG00000038970	ENSMUSG00000021175	ENSMUSG00000052713	ENSMUSG00000019961	ENSMUSG00000041164
ENSMUSG00000054302	ENSMUSG00000026917	ENSMUSG00000024517	ENSMUSG00000001039	ENSMUSG00000055723	ENSMUSG00000030337	ENSMUSG00000026189
ENSMUSG00000010362	ENSMUSG00000059939	ENSMUSG00000056592	ENSMUSG00000058756	ENSMUSG00000058070	ENSMUSG00000025241	ENSMUSG00000008140
ENSMUSG00000048000	ENSMUSG00000035762	ENSMUSG00000070002	ENSMUSG00000041329	ENSMUSG00000027803	ENSMUSG00000036907	ENSMUSG00000002799
ENSMUSG00000004895	ENSMUSG00000030400	ENSMUSG00000042320	ENSMUSG00000079179	ENSMUSG00000032754	ENSMUSG00000071645	ENSMUSG00000028677
ENSMUSG00000054263	ENSMUSG00000097711	miRBase:MI0000646	ENSMUSG00000044857	ENSMUSG00000025024	ENSMUSG00000021264	ENSMUSG00000034928
ENSMUSG00000029427	ENSMUSG00000067787	ENSMUSG00000068758	ENSMUSG00000041548	ENSMUSG00000046062	ENSMUSG00000021749	miRBase:MI0004694
ENSMUSG00000069308	ENSMUSG00000041308	ENSMUSG00000093806	ENSMUSG00000017144	ENSMUSG00000018604	ENSMUSG00000021277	ENSMUSG00000022200
ENSMUSG00000045763	ENSMUSG00000026594	ENSMUSG00000063334	ENSMUSG00000046546	ENSMUSG00000095024	ENSMUSG00000042451	ENSMUSG00000038807
ENSMUSG00000025571	ENSMUSG00000030970	ENSMUSG00000015882	ENSMUSG00000025215	ENSMUSG00000040943	ENSMUSG00000037415	ENSMUSG00000050199
ENSMUSG00000085860	ENSMUSG00000016477	ENSMUSG00000024456	ENSMUSG00000014551	ENSMUSG00000096807	ENSMUSG00000071076	ENSMUSG00000028398
ENSMUSG00000006705	ENSMUSG00000013089	ENSMUSG00000002396	ENSMUSG00000042901	ENSMUSG00000055531	ENSMUSG00000030583	ENSMUSG00000075415
ENSMUSG00000060860	ENSMUSG00000024222	ENSMUSG00000029726	ENSMUSG00000048078	ENSMUSG00000003360	ENSMUSG00000021359	ENSMUSG00000045591
ENSMUSG00000038467	ENSMUSG00000056752	ENSMUSG00000042331	ENSMUSG00000003779	ENSMUSG00000051329	ENSMUSG00000028796	ENSMUSG00000027035
ENSMUSG00000031843	ENSMUSG00000028782	ENSMUSG00000032816	ENSMUSG00000039844	ENSMUSG00000039050	ENSMUSG00000024565	ENSMUSG00000026283
ENSMUSG00000037791	ENSMUSG00000001785	ENSMUSG00000004040	miRBase:MI0021901	ENSMUSG00000021464	ENSMUSG00000021217	ENSMUSG00000056493
ENSMUSG00000005148	ENSMUSG00000035161	ENSMUSG00000024393	ENSMUSG00000085772	ENSMUSG00000030124	ENSMUSG00000038910	ENSMUSG00000008200
ENSMUSG00000015605	ENSMUSG00000025316	ENSMUSG00000029657	ENSMUSG00000018906	ENSMUSG00000090206	ENSMUSG00000020092	ENSMUSG00000045962
ENSMUSG00000027168	ENSMUSG00000020042	ENSMUSG00000030519	ENSMUSG00000068329	ENSMUSG00000001211	ENSMUSG00000047832	ENSMUSG00000027012
ENSMUSG00000000884	ENSMUSG00000047777	ENSMUSG00000078923	ENSMUSG00000041930	ENSMUSG00000044276	ENSMUSG00000040896	ENSMUSG00000051435
ENSMUSG00000031155	ENSMUSG00000020134	ENSMUSG00000002341	ENSMUSG00000024530	ENSMUSG00000027985	ENSMUSG00000038914	ENSMUSG00000046668
ENSMUSG00000029655	ENSMUSG00000032076	ENSMUSG00000028284	ENSMUSG00000052658	ENSMUSG00000041075	ENSMUSG00000021326	ENSMUSG00000055024
ENSMUSG00000028690	ENSMUSG00000005312	ENSMUSG00000069769	ENSMUSG00000007603	ENSMUSG00000021115	ENSMUSG00000098090	ENSMUSG00000042700
ENSMUSG00000038292	ENSMUSG00000025086	ENSMUSG00000009418	ENSMUSG00000033669	ENSMUSG00000049878	ENSMUSG00000024451	ENSMUSG00000027534
ENSMUSG00000020599	ENSMUSG00000033186	ENSMUSG00000048904	ENSMUSG00000032012	ENSMUSG00000044647	ENSMUSG00000005442	ENSMUSG00000000606
ENSMUSG00000022391	ENSMUSG00000023027	ENSMUSG00000021952	ENSMUSG00000019982	ENSMUSG00000021823	ENSMUSG00000027293	ENSMUSG00000024096
ENSMUSG00000030213	ENSMUSG00000029710	ENSMUSG00000036613	ENSMUSG00000020271	ENSMUSG00000025578	ENSMUSG00000022265	ENSMUSG00000042535
ENSMUSG00000007817	ENSMUSG00000026610	ENSMUSG00000029814	ENSMUSG00000026074	ENSMUSG00000019731	ENSMUSG00000028857	ENSMUSG00000016559
ENSMUSG00000042699	ENSMUSG00000055491	ENSMUSG00000056608	ENSMUSG00000001285	ENSMUSG00000025203	ENSMUSG00000019831	ENSMUSG00000051391
ENSMUSG00000022510	ENSMUSG00000034880	ENSMUSG00000036676	ENSMUSG00000010048	ENSMUSG00000023927	ENSMUSG00000026398	ENSMUSG00000058656
ENSMUSG00000059552	ENSMUSG00000003380	ENSMUSG00000028136	ENSMUSG00000062785	ENSMUSG00000025575	miRBase:MI0009934	ENSMUSG00000020232
ENSMUSG00000004637	ENSMUSG00000022529	ENSMUSG00000025532	ENSMUSG00000020238	ENSMUSG00000087590	ENSMUSG00000020598	ENSMUSG00000078794
ENSMUSG00000022463	ENSMUSG00000033730	ENSMUSG00000042502	ENSMUSG00000072582	ENSMUSG00000030401	ENSMUSG00000057133	ENSMUSG00000029465
ENSMUSG00000028614	ENSMUSG00000030091	ENSMUSG00000052040	ENSMUSG00000049550	ENSMUSG00000020876	ENSMUSG00000035011	ENSMUSG00000031822
ENSMUSG00000036990	ENSMUSG00000042625	ENSMUSG00000028465	ENSMUSG00000052889	ENSMUSG00000020521	ENSMUSG00000005534	ENSMUSG00000036390
ENSMUSG00000020770	ENSMUSG00000074466	ENSMUSG00000039850	ENSMUSG00000078768	ENSMUSG00000098230	ENSMUSG00000024642	ENSMUSG00000029439
ENSMUSG00000024947	ENSMUSG00000041112	ENSMUSG00000025290	ENSMUSG00000027547	ENSMUSG00000008475	ENSMUSG00000097543	ENSMUSG00000025371
ENSMUSG00000036158	ENSMUSG00000026608	ENSMUSG00000085214	ENSMUSG00000038150	ENSMUSG00000021913	ENSMUSG00000038375	ENSMUSG00000045095
ENSMUSG00000030613	ENSMUSG00000036913	ENSMUSG00000014329	ENSMUSG00000017764	ENSMUSG00000005718	ENSMUSG00000030536	ENSMUSG00000041773
ENSMUSG00000008028	ENSMUSG00000026643	ENSMUSG00000037326	ENSMUSG00000060032	ENSMUSG00000030060	ENSMUSG00000050910	ENSMUSG00000038765
ENSMUSG00000007458	ENSMUSG00000015711	ENSMUSG00000038406	ENSMUSG00000053654	ENSMUSG00000001227	ENSMUSG00000038893	miRBase:MI0000564
ENSMUSG00000025558	ENSMUSG00000020843	ENSMUSG00000058709	ENSMUSG00000005370	ENSMUSG00000090071	ENSMUSG00000072872	ENSMUSG00000024687
ENSMUSG00000031906	ENSMUSG00000048988	ENSMUSG00000036904	ENSMUSG00000053129	ENSMUSG00000040721	ENSMUSG00000061517	ENSMUSG00000004231
miRBase:MI0021932	ENSMUSG00000021474	ENSMUSG00000037747	ENSMUSG00000029576	ENSMUSG00000079557	ENSMUSG00000039323	ENSMUSG00000028344
ENSMUSG00000053730	ENSMUSG00000032235	ENSMUSG00000028483
NDUFA4L2	FLRT1	UTP14B	POLR2A	KDM2B	PRR5	RCN1	RPP25L	ESRRA	PLEKHG2	SKOR1	ALYREF2	TRAPPC6B	TNKS1BP1	KIF2C	RNF169	LMTK2	CDCA7L	ZFP608	TMPO
ZMIZ2	EAPP	WDR5	GRP	B9D1	RRAS2	VAMP1	PECR	RDM1	9430015G10RIK	ZFP658	THRA	EML1	FYCO1	EMC10	GIGYF2	TMEM161B	ELL	ATP1B2	WWTR1
C1QL2	JAG2	PRCC	ERCC2	PROX2	RAB10OS	SLC8B1	TUT1	RNF220	LIFR	GM5523	MIR135B	LEMD2	SMNDC1	YY1	RNF44	ZCCHC8	BLCAP	IL3RA	HSPB8
PPP1R15B	OIT1	MIR710	HIST1H2BP	SNTB2	ASMT	RND3	TBX3	TRAF3	GOLPH3	BASP1	RALGPS2	KRR1	FAM43A	GM5458	MYBPH	RAP1GAP2	TNRC6C	CTBP2	LCORL
TLX1	TET2	RANBP10	LGR4	2410003L11RIK	E2F3	DIAP1	MRPS25	HIST1H2BM	JUND	TMEM261	PKNOX1	ETV5	OCEL1	AIDA	CPSF6	SIPA1L3	FNBP1	UBE2S	FKBP5
MEPCE	TENM4	DDX23	TFAP2A	OLIG3	CHMP4B	DNAH9	SPECC1	KIF20A	NUP160	PHC2	CERS6	MPHOSPH6	BAI2	IGDCC4	RAPGEF1	OSBPL2	SALL3	ING5	PHF12
PWP1	STAT3	MIR6372	ROR2	TSHZ3	FOXK1	KLF5	INTS6	PRRC2A	D630024D03RIK	LAG3	PLCL2	FNBP4	SRF	BANP	HSPH1	P4HA2	TEPP	PALD1	WNK1
PAX6	BTBD11	APBA2	HTRA2	AGPAT3	CDCA4	DYNC1I2	GNB1L	PHF13	UBE2V1	FAM222A	4933427E11RIK	KCND3	FHAD1	PIM2	PELI1	NCAN	SLMO1	LEF1	DIDO1
CXXC5	N4BP2L2	CADM1	MAP3K7	5830454E08RIK	FZD7	TRIM27	EP300	MMACHC	UBQLN1	MSI2	DUS3L	VRK1	2700099C18RIK	SIPA1L1	CCDC155	TRUB1	NAV1	ZFP7	RLF
ARAP3	SNX16	RGS9	MZT1	NEUROG1	PVRL1	CSRNP3	CIC	VMN2R88	RANGAP1	ATF1	XPO4	MYB	VCL	EHD4	RALBP1	ATF7IP	EPHB4	TSSC1	FBXW11
CBX8	ANK	GTPBP1	ZMIZ1	ESRRG	IGF2BP3	MAP4K4	SLC35E1	TMEM222	H3F3B	DHX9	PPRC1	CHD9	MYG1	SCD2	WASF1	YWHAG	TRP63	MRPL34	TMTC3
IFRD2	SATB1	NR5A2	SAMD12	TRP53	RABAC1	SNX27	KCNC3	CANT1	MIR1945	HMG20B	WWOX	ZFP263	CRCP	NCLN	2410004N09RIK	NRCAM	DACT3	SREBF2	EGR3
CD2BP2	PTRH2	RTN2	CHD6	ARPC3	NDC1	NUP210	KLF13	CLIP1	SNX11	ZBTB7A	GSE1	OTUD4	SAFB2	TLN1	PRKCB	RNFT1	INSR	GADD45A	UNK
GM15417	ENDOV	ZFP566	1700095B10RIK	TLE4	SFSWAP	MEN1	ELMO1	RPS24	SALL4	ARPC5	GM805	CHMP6	PRICKLE1	KCTD3	0610005C13RIK	ORMDL3	OGDHL	TRP53INP2	MAGI1
CCDC90B	TRIM67	BICC1	ZSWIM1	TFAP4	IQGAP1	ENC1	1700008O03RIK	NMT2	CAPN15	H2AFJ	HMCES	CDR2L	LMX1B	M6PR	PRUNE	SCAF1	KRT42	SEMA6B	FAM117A
MIR15A	DOCK9	TIMM22	EGLN2	MSH6	CDK5R2	RYBP	OSBP	SMPD3	ELFN1	FZD8	GSX1	ZFHX2	SOX21	PAX2	MIR21C	SFXN1	D630013N20RIK	RADIL	MARCH2
IGFBP2	INVS	TMEM39B	ICE2	SNAPC3
Oct4x:RA diff. day 14	N=185
ENSMUSG00000022371	ENSMUSG00000063919	ENSMUSG00000079445	ENSMUSG00000023243	ENSMUSG00000019987	ENSMUSG00000035491	ENSMUSG00000032666
ENSMUSG00000032420	ENSMUSG00000053062	ENSMUSG00000004891	ENSMUSG00000028226	ENSMUSG00000035104	ENSMUSG00000041817	ENSMUSG00000025780
ENSMUSG00000061576	ENSMUSG00000069171	ENSMUSG00000055312	ENSMUSG00000022415	ENSMUSG00000036510	ENSMUSG00000028370	ENSMUSG00000066113
ENSMUSG00000030650	ENSMUSG00000030769	ENSMUSG00000050541	ENSMUSG00000027463	ENSMUSG00000035615	ENSMUSG00000025017	ENSMUSG00000035566
ENSMUSG00000044768	ENSMUSG00000051951	ENSMUSG00000032625	ENSMUSG00000054728	ENSMUSG00000050211	ENSMUSG00000034738	ENSMUSG00000039546
ENSMUSG00000030214	ENSMUSG00000026389	ENSMUSG00000020589	ENSMUSG00000028435	ENSMUSG00000050240	ENSMUSG00000029188	ENSMUSG00000031665
ENSMUSG00000030342	ENSMUSG00000020407	ENSMUSG00000057615	ENSMUSG00000043388	ENSMUSG00000045179	ENSMUSG00000029553	ENSMUSG00000032849
ENSMUSG00000039910	ENSMUSG00000000732	ENSMUSG00000029103	ENSMUSG00000021214	ENSMUSG00000001300	ENSMUSG00000041372	ENSMUSG00000039621
ENSMUSG00000035158	ENSMUSG00000038143	ENSMUSG00000049112	ENSMUSG00000063972	ENSMUSG00000034391	ENSMUSG00000028766	ENSMUSG00000031245
ENSMUSG00000028640	ENSMUSG00000027500	ENSMUSG00000066477	ENSMUSG00000047669	ENSMUSG00000021360	ENSMUSG00000017861	ENSMUSG00000074736
ENSMUSG00000074303	ENSMUSG00000042246	ENSMUSG00000027478	ENSMUSG00000027996	ENSMUSG00000019891	ENSMUSG00000037020	ENSMUSG00000028255
ENSMUSG00000026235	ENSMUSG00000052331	ENSMUSG00000021638	ENSMUSG00000001901	ENSMUSG00000045731	ENSMUSG00000087166	ENSMUSG00000028587
ENSMUSG00000039959	ENSMUSG00000021895	ENSMUSG00000001131	ENSMUSG00000030428	ENSMUSG00000018500	ENSMUSG00000068748	ENSMUSG00000021678
ENSMUSG00000032902	ENSMUSG00000048978	ENSMUSG00000040118	ENSMUSG00000022661	ENSMUSG00000035769	ENSMUSG00000029436	ENSMUSG00000001604
ENSMUSG00000030353	ENSMUSG00000060461	ENSMUSG00000029201	ENSMUSG00000061393	ENSMUSG00000071757	ENSMUSG00000057719	ENSMUSG00000032495
ENSMUSG00000031681	ENSMUSG00000036466	ENSMUSG00000029108	ENSMUSG00000041488	ENSMUSG00000020844	ENSMUSG00000024036	ENSMUSG00000052397
ENSMUSG00000028078	ENSMUSG00000002985	ENSMUSG00000020427	ENSMUSG00000030800	ENSMUSG00000006567	ENSMUSG00000031790	ENSMUSG00000051379
ENSMUSG00000028354	ENSMUSG00000048096	ENSMUSG00000027495	ENSMUSG00000050966	ENSMUSG00000047878	ENSMUSG00000028933	ENSMUSG00000038618
ENSMUSG00000029648	ENSMUSG00000047085	ENSMUSG00000022321	ENSMUSG00000026628	ENSMUSG00000004661	ENSMUSG00000024331	ENSMUSG00000072244
ENSMUSG00000027296	ENSMUSG00000091387	ENSMUSG00000029669	ENSMUSG00000028680	ENSMUSG00000072572	ENSMUSG00000020183	ENSMUSG00000034127
ENSMUSG00000022885	ENSMUSG00000025478	ENSMUSG00000071369	ENSMUSG00000042379	ENSMUSG00000037463	ENSMUSG00000037600	ENSMUSG00000024140
ENSMUSG00000021108	ENSMUSG00000018822	ENSMUSG00000051176	ENSMUSG00000041594	ENSMUSG00000027562	ENSMUSG00000089922	ENSMUSG00000033768
ENSMUSG00000032013	ENSMUSG00000033597	ENSMUSG00000044117	ENSMUSG00000027508	ENSMUSG00000037469	ENSMUSG00000019894	ENSMUSG00000022034
ENSMUSG00000027654	ENSMUSG00000029646	ENSMUSG00000040329	ENSMUSG00000033676	ENSMUSG00000025608	ENSMUSG00000044461	ENSMUSG00000003948
ENSMUSG00000041757	ENSMUSG00000029330	ENSMUSG00000003153	ENSMUSG00000045294	ENSMUSG00000028909	ENSMUSG00000005251	ENSMUSG00000046593
ENSMUSG00000037315	ENSMUSG00000028019	ENSMUSG00000031734	ENSMUSG00000021684	ENSMUSG00000043068	ENSMUSG00000057751	ENSMUSG00000040728
ENSMUSG00000075588	ENSMUSG00000043439	ENSMUSG00000042817
COL14A1	SRRM4	B3GNT7	KCNK5	ARG1	FTHL17A	1700025G04RIK	NT5E	JAM2	NES	MMP16	EVA1A	FAM169A	ITIH5	DPP6	NR2F1	THEM7	SYNGR1	CDH8	PAPPA
ADAMTSL1	TMC5	SLC5A11	ADRA1B	SLC52A3	FRMPD1	PIK3AP1	PCDH17	D1ERTD622E	XKR4	THSD7A	PHACTR1	PLA2G4E	NOSTRIN	AJAP1	PLBD1	STEAP3	FAM49A	AQP3	HIC2
SLC34A2	SALL1	CD9	UPP1	LDOC1	TMEM130	SOX3	TFEC	ABCC4	CITED2	ICOSL	LRPAP1	AKR1C18	EFNB2	B4GALNT3	PREX1	MITF	STOX2	OXTR	NR6A1
FBXO15	ALPL	HMGN5	TFAP2C	STMN2	GM16551	MSL3L2	GCNT2	MYBL2	SYNDIG1	NA	TMC7	DNMT3B	SFRP2	DCBLD1	WDR62	CLCA1	EPHA4	ANKRD44	OCLN
KCNH6	PNOC	L1TD1	ORC1	HIP1	ARHGEF3	TIMP1	TTYH1	ADORA2B	PTPRZ1	F2RL1	SLC16A1	NRSN1	CACNA2D1	CD200	XYLB	MMP17	TCEA3	TEAD4	DPPA5A
UGDH	ACVR2B	ZHX2	SH3RF2	LRRC2	SMAD1	MEGF11	PCDH7	STX3	NXN	SLC37A1	EZR	DCLK2	APOE	IGFBP3	PRSS8	ATP7B	MMP15	FLRT3	FMN2
LMOD1	FAM210B	LIN28A	A4GALT	XRCC2	RASSF7	FLT1	LRRC4B	CDH10	ATF3	ARID3B	DSC2	TRIM6	ITPKA	GCNT4	TSPAN12	PLK3	SLC39A2	CPM	TSPAN8
ST6GAL1	DPYSL4	MAP3K5	ESM1	FBXO27	KDF1	EPAS1	PRKCH	SFRP5	ZFP42	TMTC4	CAR2	3110039M20RIK	NRXN2	TRIM29	CASKIN1	2900011O08RIK	PAG1	PAPL	SLC6A15
ESCO2	FAM83D	CDX2	IL7	GABRB3	PODXL	SHISA2	MMD	PLEKHA6	CDS1	SLC2A3	INSIG1	PTPRU	RIPK4	TMEM215	JADE3	PDGFC	IRX3	PDE8B	FAM89A
MEGF6	ESRP1	HOXB2	E130012A19RIK	FLT3
RA diff. day 14xUndiff	N=21
ENSMUSG00000009596	ENSMUSG00000020467	ENSMUSG00000020788	ENSMUSG00000021367	ENSMUSG00000021508	ENSMUSG00000021803	ENSMUSG00000027188
ENSMUSG00000028341	ENSMUSG00000030218	ENSMUSG00000031375	ENSMUSG00000032015	ENSMUSG00000038963	ENSMUSG00000039349	ENSMUSG00000039376
ENSMUSG00000041559	ENSMUSG00000045330	ENSMUSG00000052353	ENSMUSG00000055780	ENSMUSG00000062609	ENSMUSG00000075014	ENSMUSG00000092035
TAF7L	EFEMP1	ATP2A3	EDN1	CXCL14	CDHR1	PAMR1	NR4A3	MGP	BGN	POU2F3	SLCO4A1	C130074G19RIK	SYNPO2L	FMOD	4933402E13RIK	CEMIP	USP26	KCNJ15	GM10800
PEG10
Oct1xOct4xRA diff. day 14	N=21
ENSMUSG00000039395	ENSMUSG00000029056	ENSMUSG00000031749	ENSMUSG00000064264	ENSMUSG00000032452	ENSMUSG00000031871	ENSMUSG00000021255
ENSMUSG00000037035	ENSMUSG00000034295	ENSMUSG00000027597	ENSMUSG00000027849	ENSMUSG00000032368	ENSMUSG00000043592	ENSMUSG00000028977
ENSMUSG00000023990	ENSMUSG00000028645	ENSMUSG00000028158	ENSMUSG00000038009	ENSMUSG00000062859	ENSMUSG00000050334	ENSMUSG00000044646
MREG	PANK4	ST3GAL2	ZFP428	CLSTN2	CDH5	ESRRB	INHBB	FHOD3	AHCY	SYT6	ZIC1	UNC5CL	CASZ1	TFEB	SLC2A1	MTTP	DNAJC22	TCP11	C130071C03RIK
ZBTB7C
Oct4xRA diff. day 14xUndiff	N=2
ENSMUSG00000032548	ENSMUSG00000001985
SLCO2A1	GRIK3
Oct1xRA diff. day 14	N=13
ENSMUSG00000092837	ENSMUSG00000013833	ENSMUSG00000041556	ENSMUSG00000024206	ENSMUSG00000032118	ENSMUSG00000064080	ENSMUSG00000037025
ENSMUSG00000052430	ENSMUSG00000039114	ENSMUSG00000032068	ENSMUSG00000039004	ENSMUSG00000091243	ENSMUSG00000061186
RPPH1	MED16	FBXO2	RFX2	FEZ1	FBLN2	FOXA2	BMPR1B	NRN1	PLET1	BMP6	VGLL3	SFMBT2
Oct4xUndiff	N=33
ENSMUSG00000038793	ENSMUSG00000033256	ENSMUSG00000004631	ENSMUSG00000046323	ENSMUSG00000022240	ENSMUSG00000078234	ENSMUSG00000024521
ENSMUSG00000058571	ENSMUSG00000024063	ENSMUSG00000047501	ENSMUSG00000055403	ENSMUSG00000024837	ENSMUSG00000037736	ENSMUSG00000031709
ENSMUSG00000052684	ENSMUSG00000050737	ENSMUSG00000062184	ENSMUSG00000029484	ENSMUSG00000026904	ENSMUSG00000031788	ENSMUSG00000017417
ENSMUSG00000028195	ENSMUSG00000031740	ENSMUSG00000041482	ENSMUSG00000031548	ENSMUSG00000042417	ENSMUSG00000026335	ENSMUSG00000026826
ENSMUSG00000050069	ENSMUSG00000060512	ENSMUSG00000030208	ENSMUSG00000042622	ENSMUSG00000020299
LEFTY1	SHF	SGCE	DPPA3	CTNND2	KLHDC7A	PMAIP1	GPC6	LBH	CLDN4	4933427D06RIK	DMRT1	LIMCH1	TBC1D9	JUN	PTGES	HS6ST2	ANXA3	SLC4A10	KIFC3
PLXDC1	CYR61	MMP2	PIEZO2	SFRP1	CCNO	PAM	NR4A2	GREM2	0610040J01RIK	EMP1	MAFF	4930524B15RIK
Oct1xOct4xUndiff	N=10
ENSMUSG00000033467	ENSMUSG00000008734	ENSMUSG00000020419	ENSMUSG00000040563	ENSMUSG00000000567	ENSMUSG00000038387	ENSMUSG00000037868
ENSMUSG00000027210	ENSMUSG00000000305	ENSMUSG00000070407
CRLF2	GPRC5B	HORMAD2	LPPR2	SOX9	RRAS	EGR2	MEIS2	CDH4	HS3ST3B1
Oct1xUndiff	N=3
ENSMUSG00000003545	ENSMUSG00000021365	ENSMUSG00000022475
FOSB	NEDD9	HDAC7
