# Supplementary material for: Enforcement of developmental lineage specificity by transcription factor Oct1
Source: eLife. 2017 May 24;6:e20937. doi: 10.7554/eLife.20937 (PMC5466424; doi:10.7554/eLife.20937)
Supplement: Supplementary file 3. — DOI: http://dx.doi.org/10.7554/eLife.20937.033 [file elife-20937-supp3.xlsx]

## Sheet: Sheet1
Shen et al Supplementary file 3-table 3: Oligonucleotides for RT-qPCR and ChIP
RT-qPCR primer sequences:
Name	Sequence (5'-->3')	Source (ref)	notes
RT MmPou2f1V2.for(Oct1)	GACTTTCAGAAACAGCCCGTGC
RT. MmPou2f1V2.rev(Oct1)	CTGAGCAGCAGCCTGTAAACTTG
RT.mOct4.for	TAGTTCGCTTTCTCTTCCGGG
RT.mOct4.rev	GCAGCTCAGCCTTAAGAACATGTG
RT.mSox2.for	GAGTGGAAACTTTTGTCCGAGA
RT.mSox2.rev	GAAGCGTGTACTTATCCTTCTTCAT
RT.mNanog.for	CAGGTGTTTGAGGGTTAGCTC
RT.mNanog.rev	CGGTTCATCATGGTACAGTC
RT.mHoxC6.for	CCCAGGACCAGAAAGCCAGTATC
RT.mHoxC6.rev	CCTTCTCCAGTTCCAGGGTCTG
RT.mHoxA5.for	CTTTCTCCAGCTCCAGGGTCTG
RT.mHoxA5.rev	CCGCTCAGCCCCAGATCTAC
RT.mGATA2.for	CAACGCCTGTGGCCTCTACTAC
RT.mGATA2.rev	TCCTCGAAACATTCAGCCCC
RT.mFGF5-FOR	TGTCTCAGGGGATTGTAGGAATACG
RT.mFGF5-Rev	CTGTTTTCTTGGAATCTCTCCCTG
RT.mSox17.For	CGCTTCTCTGCCAAGGTCAAC
RT.mSox17.Rev	CGATGAACGCCTTTATGGTGTG
RT.mDppa4.for	TGTCTAGTCAACCAAGCACG
RT.mDppa4.rev	ACCTTCCTACGAGTCTGTCC
RT.mCdx2.for	TTATGGACCTCAGGGGAAGACA	(Yeap LS, Hayashi K, Surani MA. 2009 Epigenetics Chromatin 2:12)
RT.mCdx2.rev	GAAGAAGCCCCAGGAATCACTT	(Yeap LS, Hayashi K, Surani MA. 2009 Epigenetics Chromatin 2:12)
RT.mRPL13.for	CTC TGG CCT TTT CCT TTT TG	qPrimerdepot (https://primerdepot.nci.nih.gov)
RT.mRPL13.rev	CCG AAG AAG GGA GAC AGT TC	qPrimerdepot (https://primerdepot.nci.nih.gov)
RT.mHand1.for	CCCCTCTTCCGTCCTCTTAC
RT.mHand1.rev	CTGCGAGTGGTCACACTGAT
RT.mBranchy.for	CCTCCCTTGTTGCCTTAGAGTAGTT
RT.mBranchy.rev	GCAGATTGTCTTTGGCTACTTTGTC
RT.mMap2.for	GAAAAGGCCCAAGCTAAAG
RT.mMap2.rev	GCCTTTGCATGCTCTCTG
RT.mTUBB3.for	ACCTGGAACCATGGACAG
RT.mTUBB3.rev	CCGTATAGTGCCCTTTGG
RT.mNestin.for	TCTGCTGGAGGCTGAGAAC
RT.mNestin.rev	TGCTGGTCCTCTGGTATCC
RT.mMef2c.for	TCCGTAGCAACTCCTACTTTACCAG
RT.mMef2c.rev	CGCACTGGCAGTGTTGAAGC
RT.mMLC2v.for	CTGACCACACAAGCAGAGAGGTTC
RT.mMLC2v.rev	CAGTCCTTCTCTTCTCCGTGGG
RT.mMLC2a.for	GTTCAAGCAGCTTCTCATGACCC
RT.mMLC2a.rev	CCGTGGGTGATGATGTAGCAG
RT.mPrl8a6.for	TTGTGGGTTCCTGGATCAGC	Primer3 (http://bioinfo.ut.ee/primer3-0.4.0/)
RT.mPrl8a6.rev	TCTTCTGTCATCTCTGCCGC	Primer3 (http://bioinfo.ut.ee/primer3-0.4.0/)
RT.mAHCY(1).for	CGCATGCGCATCAATCCTG	(Shakya et al. JBC 2011 286:450)	Fig.1C
RT.mAHCY(1).rev	CCAGCATGTCTGATAAACTGCC	(Shakya et al. JBC 2011 286:450)	Fig.1C
RT.mAHCY(2).for	CGTGATGAGCAACTCCTTCA	Primer3 (http://bioinfo.ut.ee/primer3-0.4.0/)	Fig.5G
RT.mAHCY(2).rev	TGGTCAGCTTCACATTCAGC	Primer3 (http://bioinfo.ut.ee/primer3-0.4.0/)	Fig.5G
RT.mGAPDH.for	CAAGGTCATCCATGACAACTTTG
RT.mGAPDH.rev	GGCCATCCACAGTCTTCTGG
RT.mTBP.for	ACATCTCAGCAACCCACACA	qPrimerdepot (https://primerdepot.nci.nih.gov)
RT.mTBP.rev	CTGGTGTGGCAGGAGTGATA	qPrimerdepot (https://primerdepot.nci.nih.gov)
RT.mPou2F3.for	CTGGAACAGTAACGTCATCCTG	PrimerBank (https://pga.mgh.harvard.edu/primerbank/)
RT.mPou2F3.rev	AGTTCATTGCTGCTTTGGAGTT
ChIP primer sequences:
Name	Sequence (5'-->3')	Source (ref)	notes
ChIP-mPolr2a-F	CCATCTTGCCTGCCTTATGCATATT
ChIP-mPolr2a-R	TAATGAAGGCGGGGCCCTTC
Ch-mCdx2-F	CCAGCGGCCTTACGTGATTAAC
Ch-mCdx2-R	GGTTAAAGTGCACCCAGGTTGG
Ch-mOct4 enh-F	CCCCAGGGAGGTTGAGAGTT	(Shakya et al. MCB 2015 35:1014)
Ch-mOct4 enh-R	AAGGGCTAGGACGAGAGGGA	(Shakya et al. MCB 2015 35:1014)
Ch-m28S ribosome-F	CTGGGTATAGGGGCGAAAGAC
Ch-m28S ribosome-R	GGCCCCAAGACCTCTAATCAT
ChIP-mHoxc5-F	GGTGCTTTCAACTAACCTTTG
ChIP-mHoxc5-R	AGGTATAGAGAGCATAGGACAACC
ChIP-mREST-F	TCCCCTGGACAATAGCTTC
ChIP-mREST-R	CATTTCCTCAGTGTGACTGC
ChIP-mMyf5-F	GGTAGACTGGAAAAAGGGAAG
ChIP-mMyf5-R	AGCAGAGTTCTGCAGGTAGG
